# Supplementary material for: Icosahedron [Cl12]12- Templated Gigantic Gd158Co38 Nanocluster with the Largest Ln158 Core for Magnetic Cooling
Source: Research Square preprint supplement (doi:10.21203/rs.3.rs-699859/v1), 2021-07-26
Supplement: Supplementary file 1 [file 969453a851fc0636768d8ebc.docx]

**Supporting Information**

Icosahedron [Cl12]12- Templated Gigantic Gd158Co38 Nanocluster with the Largest Ln158 Core for Magnetic Cooling

Ning-Fang Li, a Xi-Ming Luo a Jia Wang, b Ji-Lei Wang, a You Song, *b Hua Mei, *, a and Yan Xu *, a, b

aCollege of Chemical Engineering, State Key Laboratory of Materials-Oriented Chemical Engineering, Nanjing Tech University, Nanjing 210009, P. R. China

bState Key Laboratory of Coordination Chemistry, School of Chemistry and Chemical Engineering, Nanjing University, Nanjing 210023, P. R. China.

**Content:**

[**Section 1. Materials and Methods 3**](#_Toc76407426)

[**X-ray crystallography. 3**](#_Toc76407427)

[**Section 2. Synthesis and Discussion 4**](#_Toc76407428)

[**Synthetic Route 4**](#_Toc76407429)

[**Synthetic Discussion 4**](#_Toc76407430)

[**Section 3. Crystal Structures 9**](#_Toc76407431)

[**The Confirmation of Counterions and Guest Molecules 9**](#_Toc76407432)

[**Structure 10**](#_Toc76407433)

[**The Coordination Modes of Ligands 10**](#_Toc76407434)

[**The Coordination Modes of Metal Ions 12**](#_Toc76407435)

[**The Crystal Structure Figures 14**](#_Toc76407436)

[**Section 4. Characterization 23**](#_Toc76407437)

[**PXRD 23**](#_Toc76407438)

[**FT-IR 24**](#_Toc76407439)

[**TGA 26**](#_Toc76407440)

[**XRF 28**](#_Toc76407441)

[**EDS 28**](#_Toc76407442)

[**XPS 31**](#_Toc76407443)

[**Section 5. Thermal Stability 32**](#_Toc76407444)

[**Section 6. Magnetic Studies 34**](#_Toc76407445)

[**Section 6. Tables 40**](#_Toc76407446)

[**Supplementary References 44**](#_Toc76407447)

# Section 1. Materials and Methods

## X-ray crystallography.

Single-crystal XRD value was harvested by a Bruker Apex Ⅱ CCD featuring a sealed tube X-ray source (Mo-Kα radiation, λ = 0.71073 Å). To resolve and refine the structures were performed by SHELX software package. The SADABS program was implemented to obtain empirical absorption corrections. The structures were defined by direct methods. Then full-matrix least-squares in the SHELXL-2018/3 program package were used to refine structures. In addition, anisotropic thermal parameters were utilized empirically in order to refine the whole non-H atoms. The crystallographic data (Table S1), selected bond lengths and selected bond angles (Table S8 – S9) were offered. Some water molecules in both compounds **Cl12@Gd158Co38** and **Br12@Gd158Co38** were removed by SQUEEZE in the refinement, but accurately confirmed by TG and elemental analyses.

#

# Section 2. Synthesis and Discussion

## Synthetic Route

**Scheme S1. Synthetic Route for Cl12@Gd158Co38.**


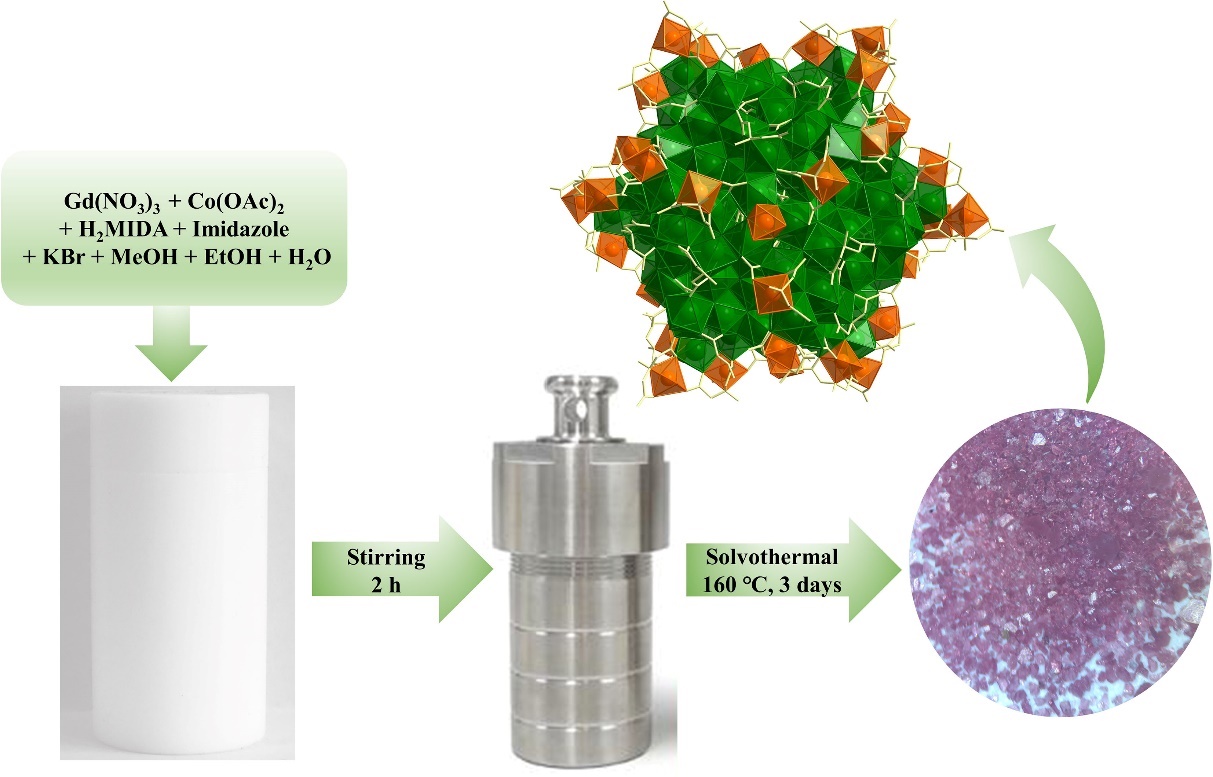


## Synthetic Discussion





**Figure** **S1.** Scheme for H2IDA (a) and H2MIDA (b).

As everyone knows, the successful assembly of high-nuclearity metal clusters is a complex process, which is greatly sensitively dependent on a number of factors.1-3 These involve the reactants (kinds of the metal salts and hydrolysis-limiting ligands, the ligand/metal ratio, possible involvement of anion templates, and so on), and reaction condition (pH, temperature, and duration).1-3

**The hydrolysis-limiting ligand**

In this article, we choose N-Methyliminodiacetic acid (abbreviated as H2MIDA) as the hydrolysis-limiting ligand. In terms of the hard-soft-acid-base theory, the lanthanide ions tend to link with hard atoms such as O and F, while transition metal ions are inclined to coordinate with soft atoms like S and N. At the same time, the reported literature shows controlling the hydrolysis of metal ions in the presence of organic ligands with N and O donors is very powerful to isolate high-nuclearity 3d-4f clusters. The iminodiacetic acid (H2IDA), possessing one -NH and two -COOH groups, is a common organic ligand and a good choice in assembly of 3d-4f complexes. For example, [La76Ni88],7 [La68Ni90],7 [Gd96Ni64],8 [Gd52Ni56],13 [Gd78Ni64],9 [Gd40Ni44],4 and [Gd20Ni21]40 have been isolated by the organic ligands of H2IDA. Owing to the similarity of H2IDA and H2MIDA (Figure S1), H2MIDA is inspired to be as the bridging ligand to construct high-nuclearity 3d-4f clusters. Meanwhile, H2MIDA was chosen its established success in the assembly of 3d-4f metal clusters. In 2013, *Wu* obtained four isostructural cluster complexes based on H2MIDA, {[Ln2Ni(MIDA)4(H2O)6](H2O)4} [Ln=La (1), Ce (2), Pr (3), and Nd (4)].4 In 2006, *Eldik* isolated a 3d metal coordination compound, Na[Fe(MIDA)2][NaClO4]2·3H2O, by the hydrolysis of Fe3+ salts in the presence of H2MIDA under solvothermal conditions.5 So the organic ligand H2MIDA is one of the best candidates for the assembly of 3d-4f metal clusters.

**Anion templates**

Previous literature illustrates that anion template plays a significant role in synthesis of metal high-nuclearity clusters, on the basis of their versatile coordination modes to bridge building units, and various dispersion of positive charges. For example, the halide ions (Cl-, Br-, I-) and oxo-anions (NO3-, ClO4-, CO32-) as simple anion templates have been widely applied in the synthesis of high-nuclearity lanthanide-based clusters.2-3 Similarly, in the synthesis of **Cl12@Gd158Co38** and **Br12@Gd158Co38**, the halide ions (Cl- and Br- as anion template) play a decisive role in the formation of the metal cluster skeletons.

Firstly, Cl- ions (from GdCl3) are used as anion templates. Fortunately, **Cl12@Gd158Co38** was successfully obtained and was templated by 12 Cl- ions (see the structural discussion for detailed information). If Cl- ions were replaced with Br-, **Br12@Gd158Co38** was synthesized and was templated by Br- ions. Interestingly, if I- ions act as the anionic templates, the synthesis is failed. Moreover, without the halide ions in synthetic process, no crystal was obtained, which showed that the halide ions (Br- and Cl- as anion templates) are especially important to assemble compounds **Cl12@Gd158Co38** and **Br12@Gd158Co38**.

**pH**

For **Cl12@Gd158Co38** and **Br12@Gd158Co38**, the pH value of the mixed solution (without imidazole) is about 3.0. In this case, there was no crystal obtained. After adding imidazole, compounds **Cl12@Gd158Co38** and **Br12@Gd158Co38** were successfully synthesized when the pH value increased significantly (pH = 5.5 approximately), suggesting it may exist as a base. Compounds **Cl12@Gd158Co38** and **Br12@Gd158Co38** could not be obtained without imidazole. Meanwhile, though imidazole did not appear in the final structure, it also plays a critical role in the structural orientation. Above all, imidazole is important to assembly of compounds **Cl12@Gd158Co38** and **Br12@Gd158Co38**. Besides, compounds **Cl12@Gd158Co38** was obtained under pH = 5.5 approximately, while **Br12@Gd158Co38** was gained with pH = 4.5.

**
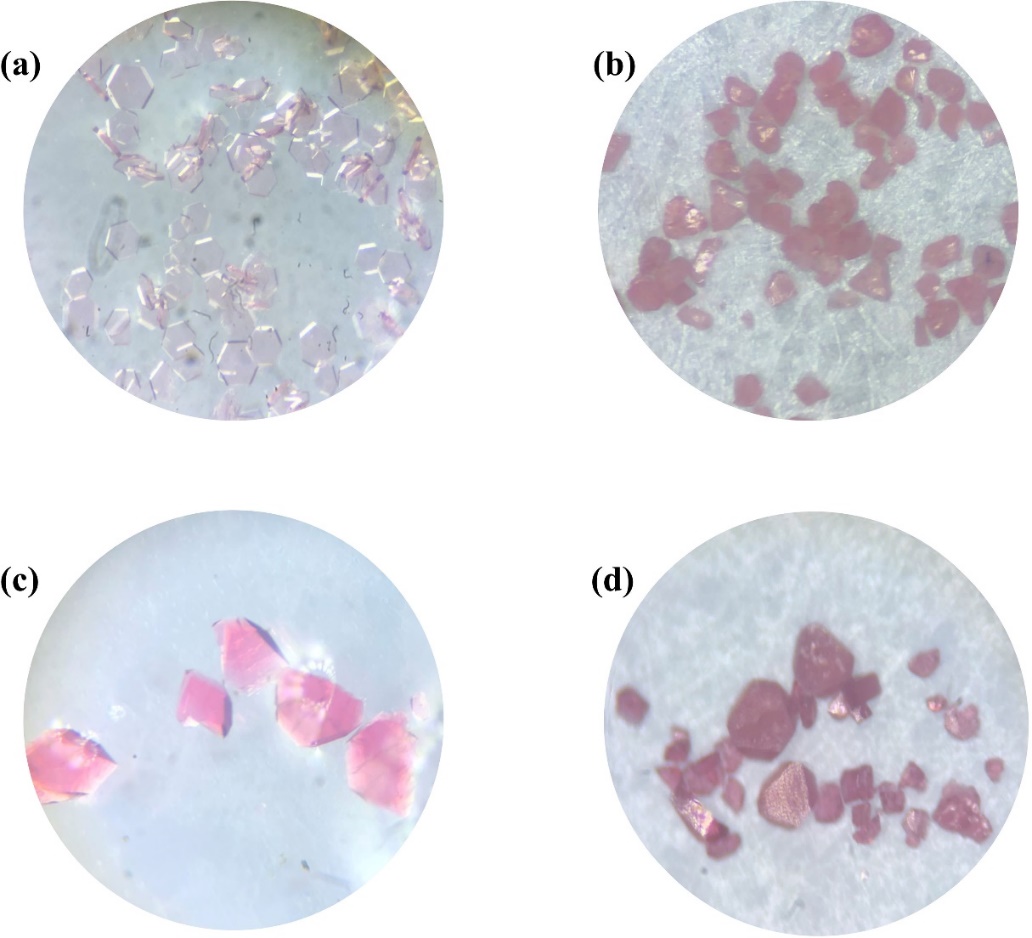
**

**Figure** **S2.** The image of **Cl12@Gd158Co38** crystal under optical microscope (a), (b); the image of **Br12**@**Gd158Co38** crystal under optical microscope (c), (d).

**Temperature**

For **Cl12@Gd158Co38** and **Br12@Gd158Co38**, 160 °C is the best choice (as shown inFigure S2b, S2d), while a small number of crystals can be obtained at 140 °C (as shown inFigure S2a, S2c). Meanwhile, a slow release or production of CO32- ions can be attained via an in-situ decomposition of ligands (H2MIDA) under high temperature (solvothermal conditions). Most importantly, the high temperature and acidic conditions, what makes it possible for a slow release or production of CO32- ions, are beneficial to construct high-nuclearity 3d-4f clusters. Similar cases have been observed before in H2IDA ligands (*Inorg. Chem*. 2019, 58, 10883−10889).6

**Scheme S1.** The situ hydrolysis of H2MIDA.


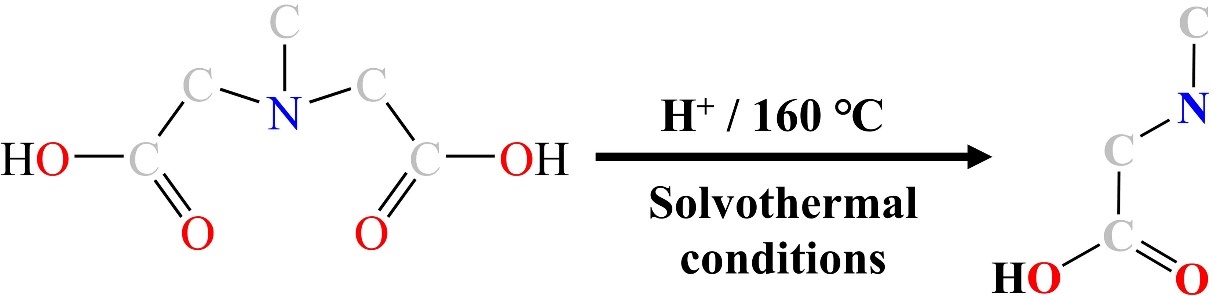


**Table S1.** Crystal data and structure refinements for **Cl12@Gd158Co38** and **Br12@Gd158Co38**.

| Compound | **Cl12@Gd158Co38** | **Br12@Gd158Co38** |
| --- | --- | --- |
| Formula | C354H1124Cl36Co38Gd158N48O950 | C360H1030Br18Cl12Co38Gd158N48O900 |
| Formula weight | 49617.99 | 49382.88 |
| T (K) | 296(2) | 296(2) |
| Crystal system | Trigonal | Trigonal |
| Space group | *R*-3 | *R*-3 |
| *a* (Å) | 37.6349(3) | 37.596(2) |
| *b* (Å) | 37.6349(3) | 37.596(2) |
| *c* (Å) | 88.833(2) | 88.527(10) |
| *α* (deg) | 90 | 90 |
| *β* (deg) | 90 | 90 |
| *γ* (deg) | 120 | 120 |
| *V* (Å3) | 108965(3) | 108364(18) |
| *Z* | 3 | 3 |
| *D*c (mg m-3) | 2.268 | 2.270 |
| *μ* (mm−1) | 7.678 | 8.169 |
| F (000) | 68802 | 68094 |
| *θ* range (deg) | 0.665-25.003 | 1.380-26.158 |
| Crystal size (mm3) | 0.13 × 0.13  × 0.12 | 0.15 × 0.13  × 0.10 |
| Limiting indices | -44<=h<=41,  -41<=k<=44,  -80<=l<=105 | -37<=h<=44,  -46<=k<=34,  -103<=l<=109 |
| Reflections collected / unique | 167088/42686 | 178280/48071 |
| R(int) | 0.0804 | 0.0569 |
| Data/restraints/parameters | 42686 / 506 / 2397 | 48071 / 253 / 2386 |
| GOF | 1.097 | 1.130 |
| *R*1a,  *wR*2[I>2σ(I)] | *R*1 = 0.0453  *wR*2 = 0.1247 | *R*1 = 0.0559  *wR*2 = 0.1352 |
| *R*1, *wR*2  (all data) | *R*1 = 0.0836  *wR*2 = 0.1421 | *R*1 = 0.1033  *wR*2 = 0.1615 |

a *R*1 = Σ||*F*o|－*|F*c||/Σ|*F*o|; b *wR*2 = Σ[*w*(*F*o2－*F*c2)2]/Σ[*w*(*F*o2)2]1/2.

#

# Section 3. Crystal Structures

## The Confirmation of Counterions and Guest Molecules

The skeletons (cationic core [Cl12@Gd158Co38(MIDA)42(CO3)90(*μ*3-OH)236(OAc)18(CH3NH2CH2COO)6(H2O)84]24+) of compound **Cl12@Gd158Co38**, and (cationic core [Br12@Gd158Co38(MIDA)42(CO3)90(*μ*3-OH)236(OAc)18(CH3O)6

(CH3NH2CH2COO)6(H2O)78]18+) of **Br12@Gd158Co38** are determined by SCXRD, while the counterions and guest molecules are confirmed by elemental analysis, TG, IR, XRF, EDS and charge balance.

For compounds **Cl12@Gd158Co38** and **Br12@Gd158Co38**, FT-IR spectra analysis suggested the no existence of NO32- molecules due to no typical peaks of N=O at 1385 cm–1, while compounds should contain CO32- molecules due to typical peaks of C=O at 1409 cm–1. The XRF, EDS, and mapping analysis suggested the present of the halide ions (Cl- ions in **Cl12@Gd158Co38**; Cl- and Br- ions in **Br12@Gd158Co38**). TGA analysis displayed 144 free H2O molecules in **Cl12@Gd158Co38** and 94 free H2O molecules in **Br12@Gd158Co38**. Combining charge conservation, we hold the view that the counterions and guest molecules of compounds **Cl12@Gd158Co38** and **Br12@Gd158Co38**.

**Cl12@Gd158Co38**

[Cl12@Gd158Co38(MIDA)42(CO3)90(*μ*3-OH)236(OAc)18(CH3NH2CH2COO)6 (H2O)84]·

Cl24·144(H2O)

**Br12@Gd158Co38**

[Br12@Gd158Co38(MIDA)42(CO3)90(*μ*3-OH)236(CH3NH2CH2COO)6(OAc)18(CH3O)6

(H2O)78]·Br6Cl12·94(H2O)

##

## Structure

The Coordination Modes of Ligands


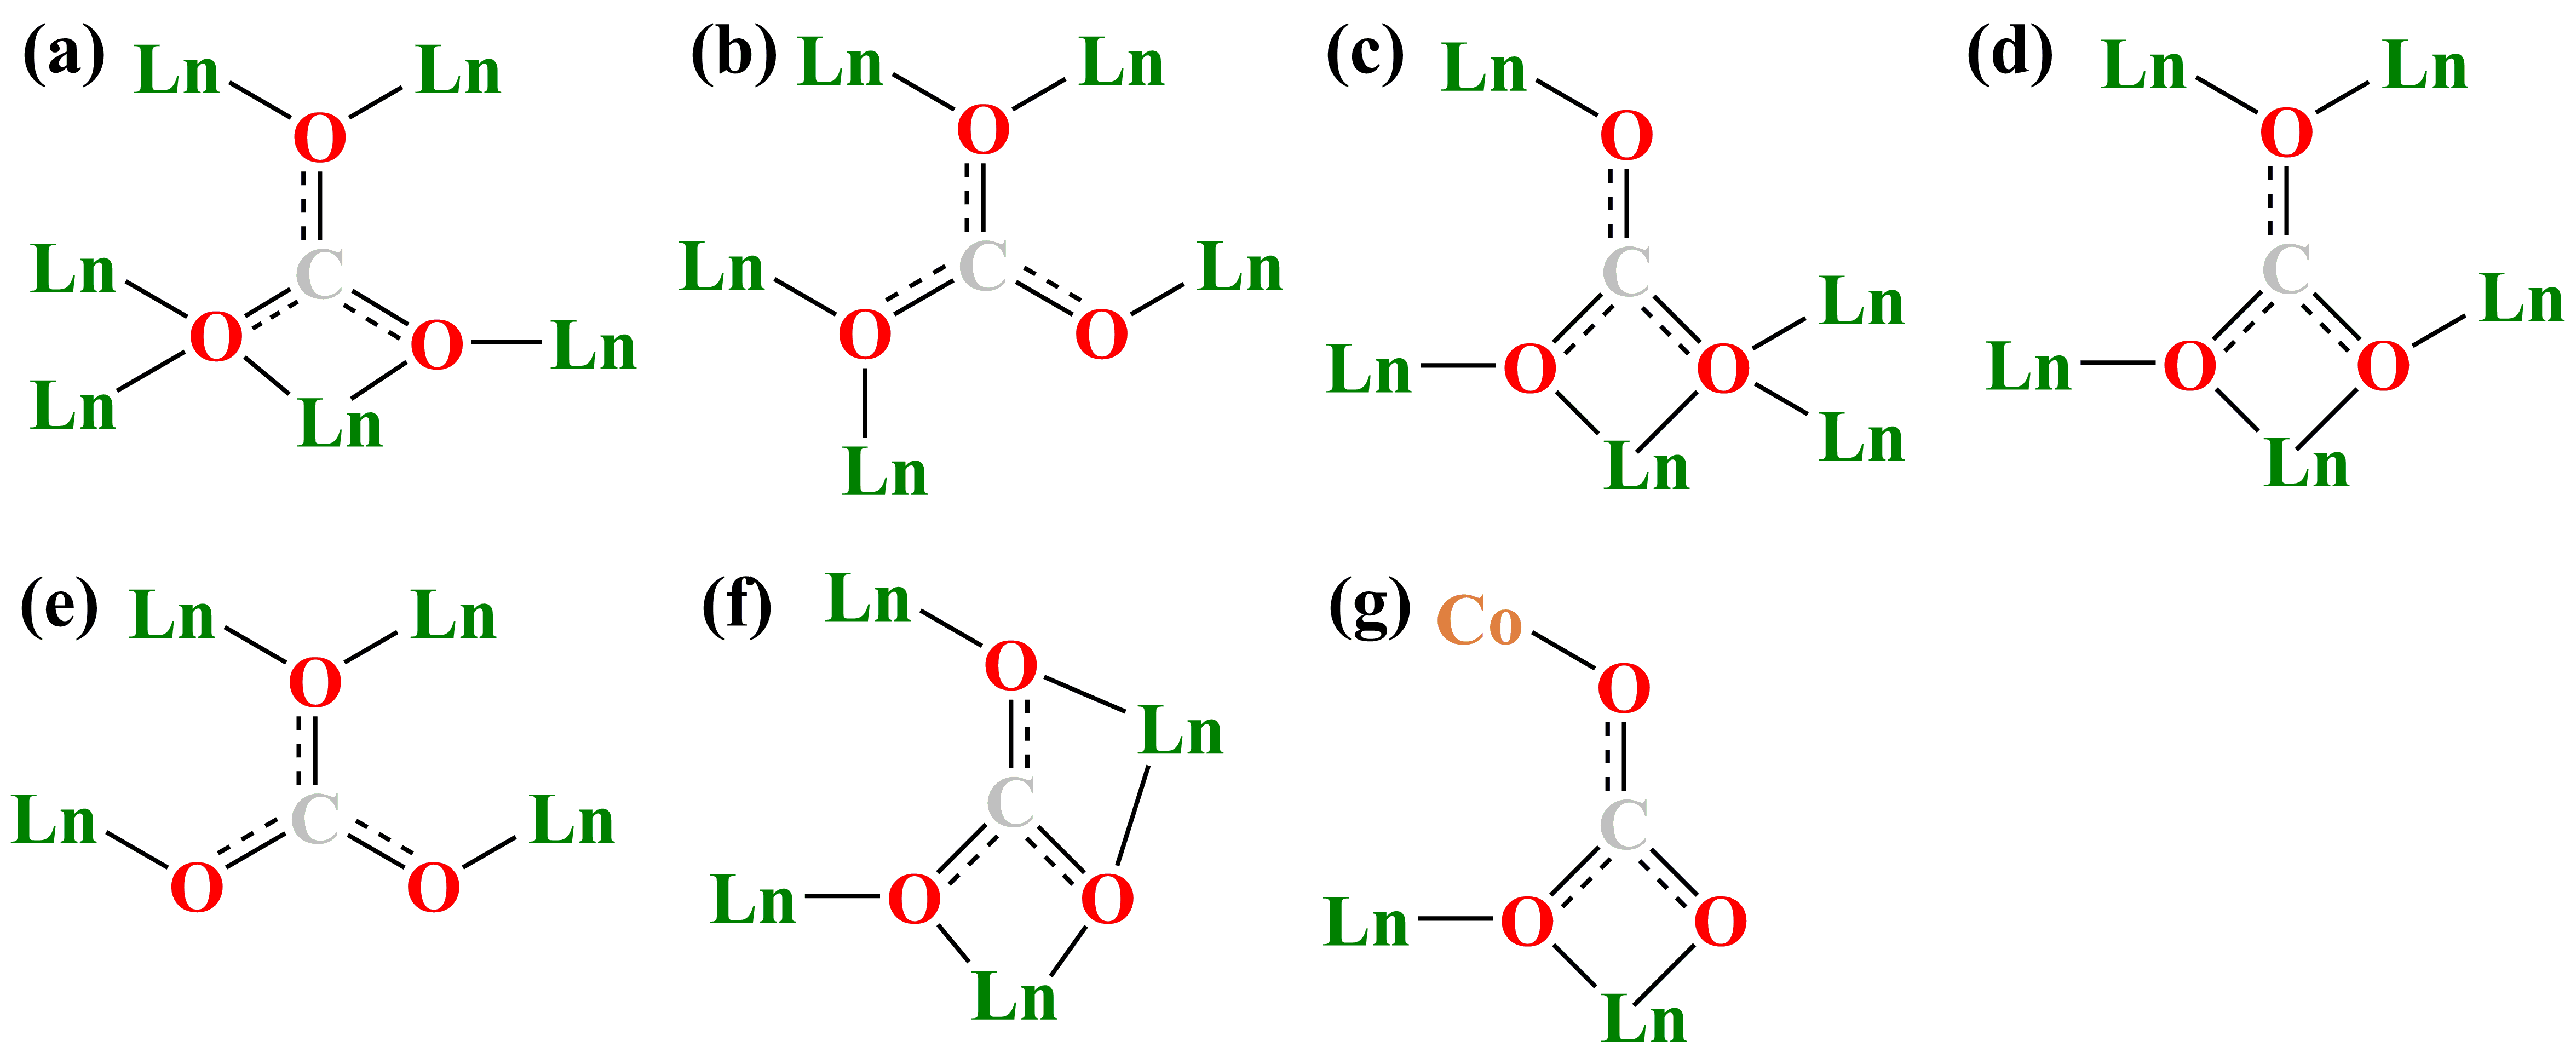


**Figure** **S3.** The coordination modes of CO32- in compound **Cl12@Gd158Co38**.

**
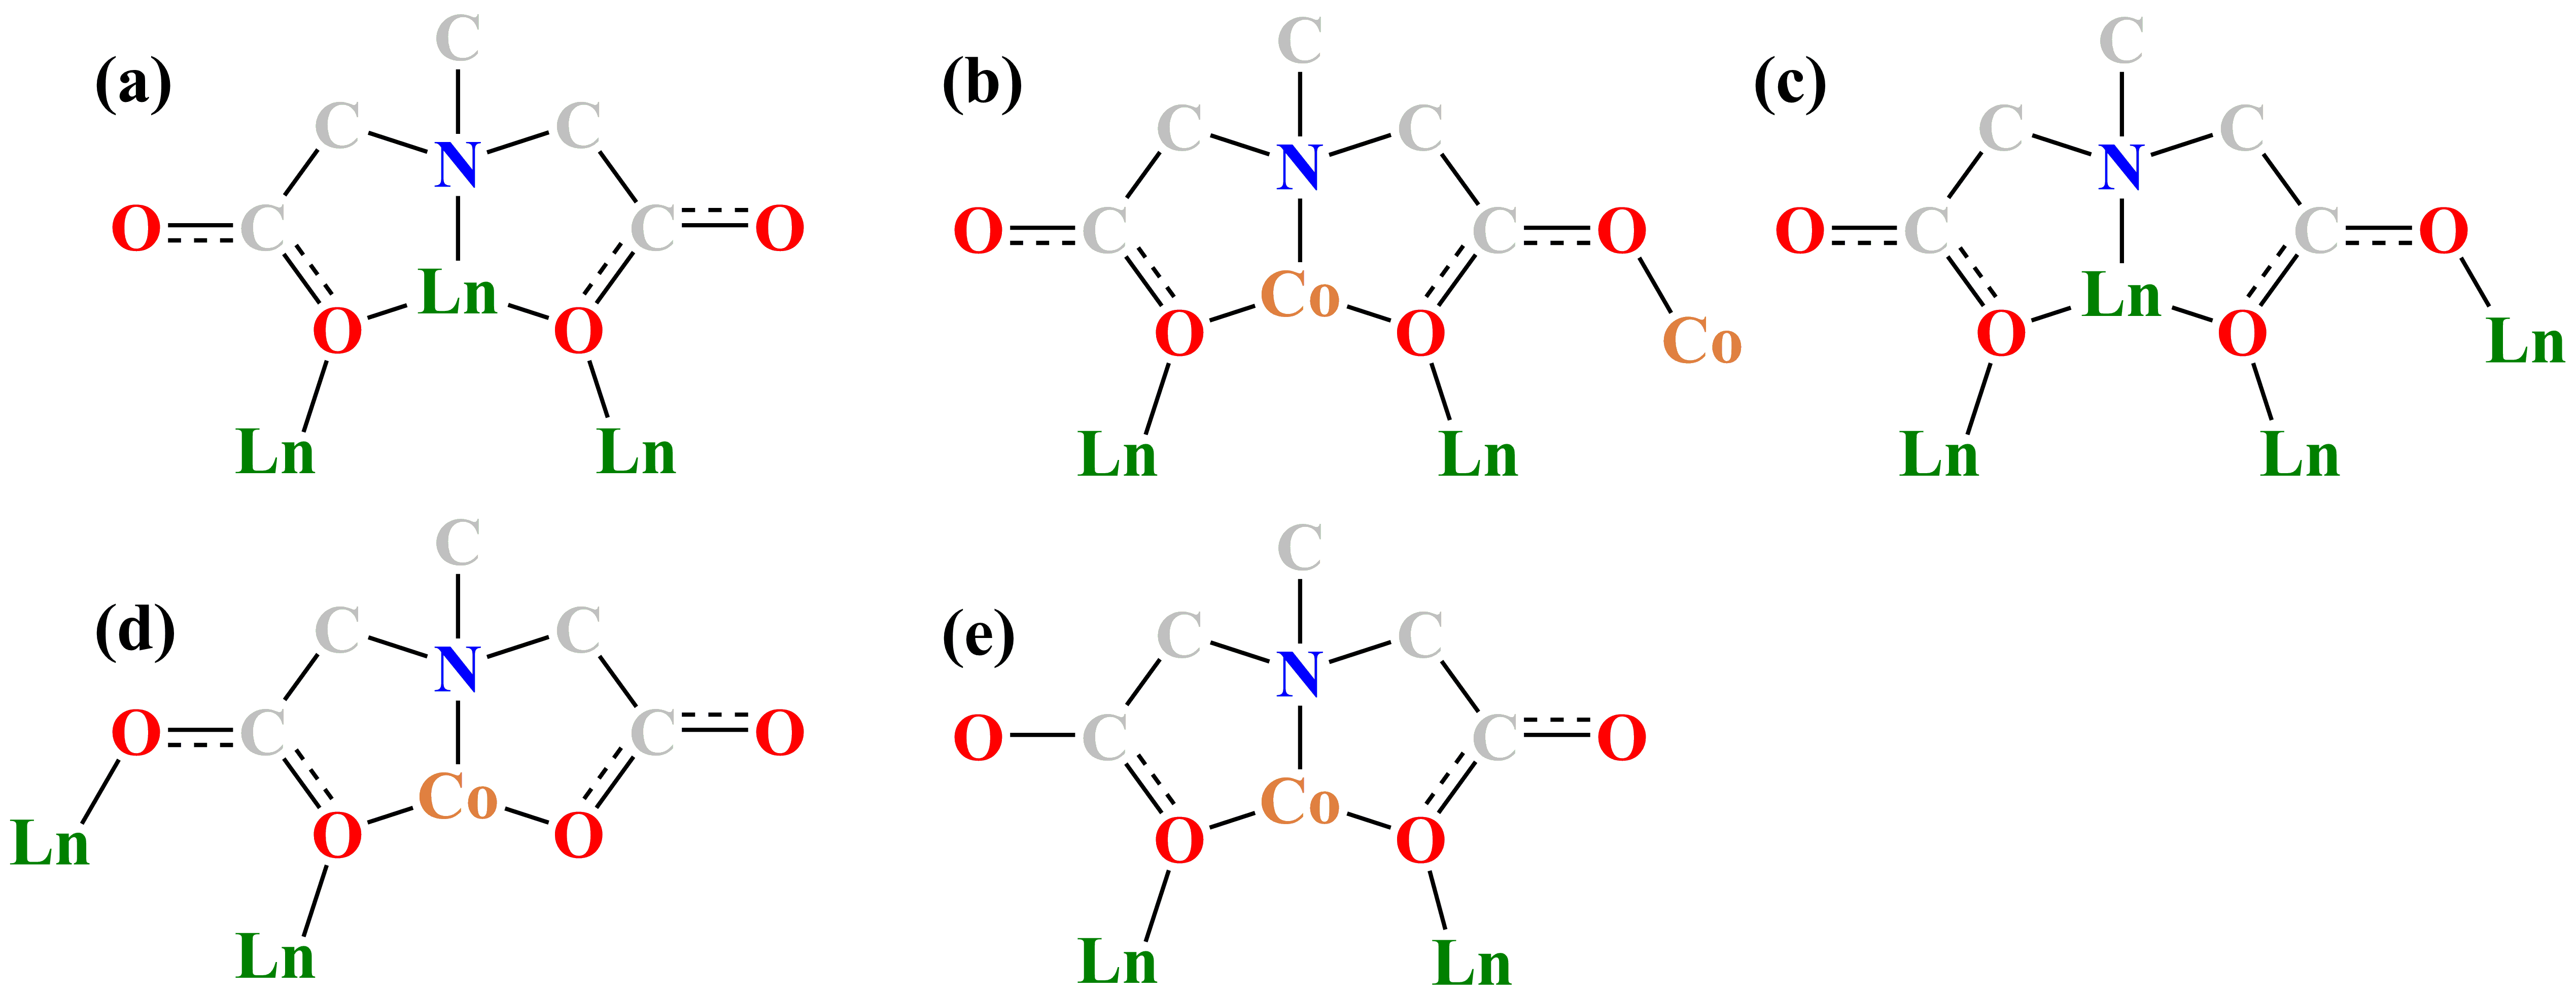
**

**Figure** **S4.** The coordination modes of H2MIDA in compound **Cl12@Gd158Co38**.

**
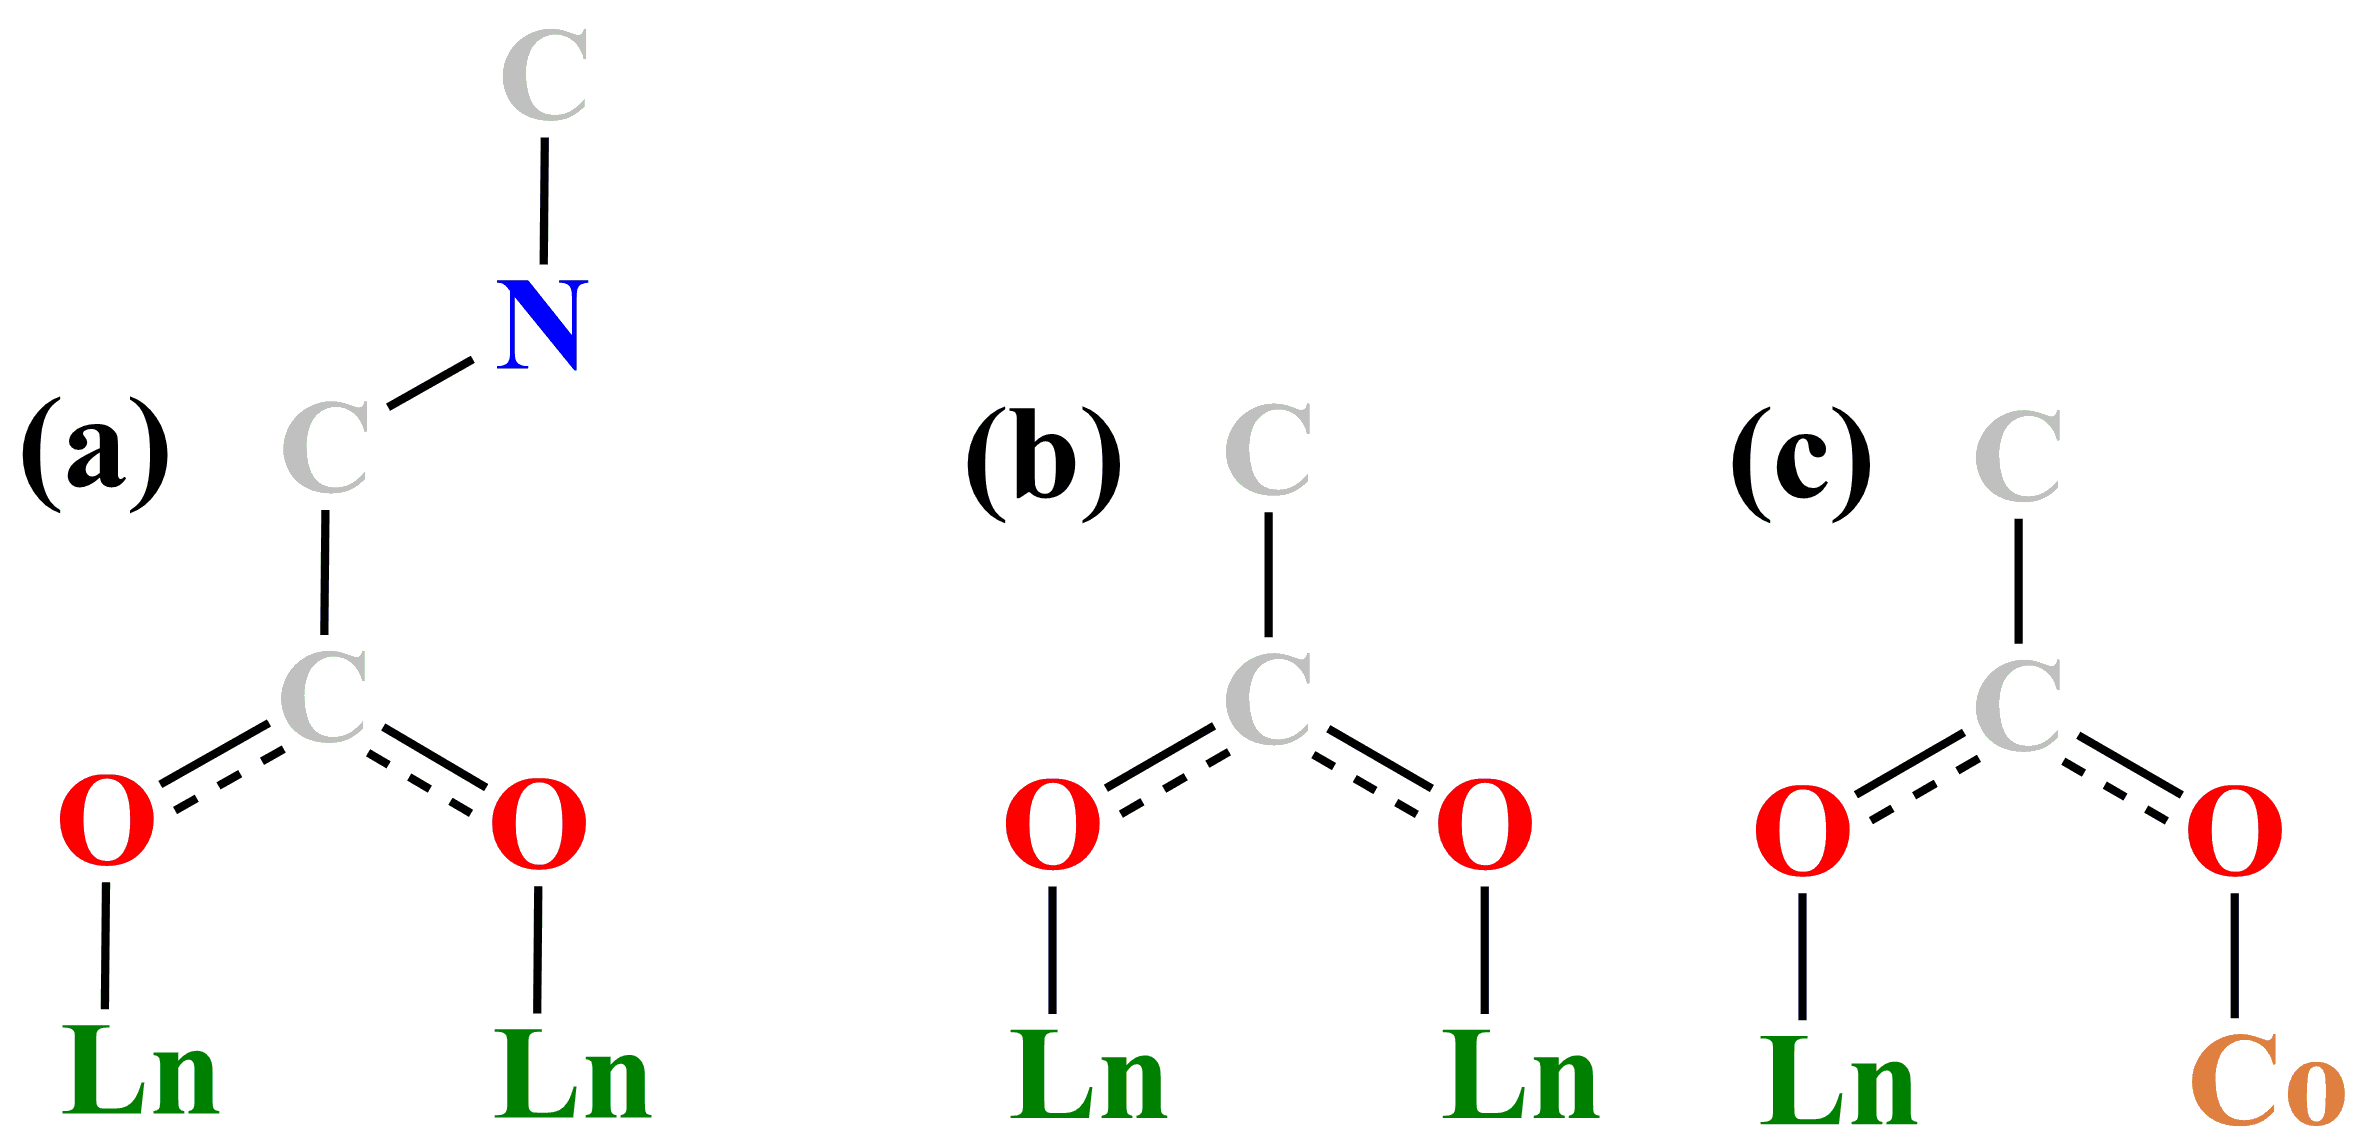
**

**Figure** **S5.** The coordination modes of sarcosine (a), and CH3COO- (b-c) in compound **Cl12@Gd158Co38**.

For ninety CO32- ions in this work show seven coordination modes (Figure S3). (I) CO32- ion is coordinated with six Ln ions, showing *μ*6: *η*2: *η*3: *η*2 (Figure S3a); (II) CO32- ion is coordinated with five Ln ions, showing *μ*5: *η*2: *η*2: *η*1 (Figure S3b); (III) CO32- ion is coordinated with five Ln ions, showing *μ*5: *η*3: *η*2: *η*1 (Figure S3c); (IV) CO32- ion is coordinated with five Ln ions, showing *μ*5: *η*2: *η*2: *η*1 (Figure S3d); (V) CO32- ion is coordinated with four Ln ions, showing *μ*4: *η*2: *η*1: *η*1 (Figure S3e); (VI) CO32- ion is coordinated with four Ln ions, showing *μ*4: *η*2: *η*2: *η*2 (Figure S3f); (VIII) CO32- ion is coordinated with three metal ions (one Co and two Ln ions, showing *μ*3: *η*2: *η*1: *η*1, Figure S3g).

In this work, there are five coordination modes for H2MIDA ligands (Figure S4). (I) MIDA2- ligand is linked with three Ln ions, forming the mode I (*μ*3: *η*2: *η*1: *η*2; Figure S4a); (II) MIDA2- ligand is linked with two Ln and two Co ions, forming the mode II (*μ*4: *η*2: *η*1: *η*2: *η*1; Figure S4b); (III) MIDA2- ligand is linked with four Ln ions, forming the mode III (*μ*4: *η*2: *η*1: *η*2: *η*1; Figure S4c); (IV) MIDA2- ligand is linked with one Co and two Ln ions, forming the mode IV (*μ*3: *η*1: *η*2: *η*1; Figure S4d); (V) MIDA2- ligand is linked with one Co and two Ln ions, forming the mode V (*μ*3: *η*2: *η*1: *η*2; Figure S4e).

Besides, the sarcosine (CH3NH2CH2COO-) only exhibits one coordination mode and links with two Ln ions (Figure S5a), showing *μ*2: *η*1: *η*1.

For CH3COO- ligands, it is coordinated with two Ln ions, forming the mode I (showing *μ*2: *η*1: *η*1, Figure S5b), and CH3COO- ligand is coordinated with one Ln and one Co ion, forming the mode II (showing *μ*2: *η*1: *η*1, Figure S5c).

The Coordination Modes of Metal Ions

**
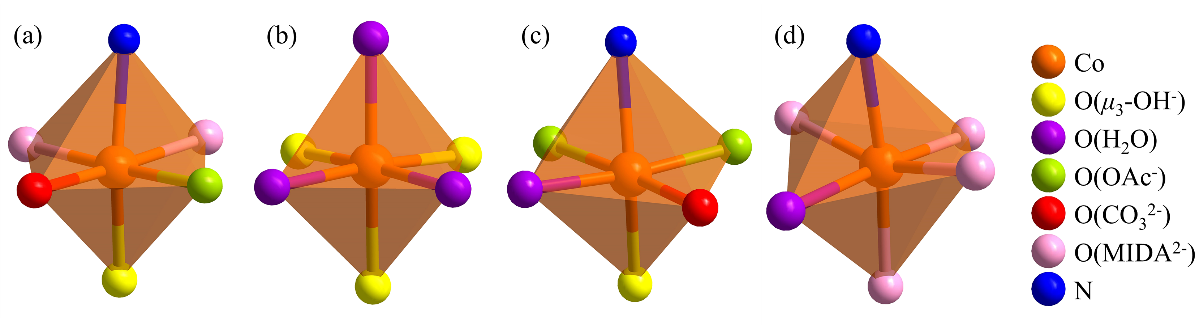
**

**Figure** **S6.** The coordination modes of Co ions in compounds **Cl12@Gd158Co38**.

In compound **1**, there are seven coordination modes of all Co ions. And those Co ions are hexa-coordinate, displaying near-octahedral geometry (Figure S6). (I) as shown in Figure S6a, Co ion is coordinated to one N atom (from one H2MIDA) and five O atoms (from one H2MIDA, one CH3COO-, one CO32-, and one *μ*3-OH- groups); (II) as shown in Figure S6b, Co is coordinated to six O atoms (from one three coordination H2O, and three *μ*3-OH- groups); (III) as shown in Figure S6c, Co3 is coordinated to one N atom (from one H2MIDA) and five O atoms (from one H2MIDA, one H2O, one CO32-, and one *μ*3-OH- groups); (IV) as shown in Figure S6d, Co3 is coordinated to one N atom (from one H2MIDA) and five O atoms (from one H2O, and three H2MIDA groups).

**
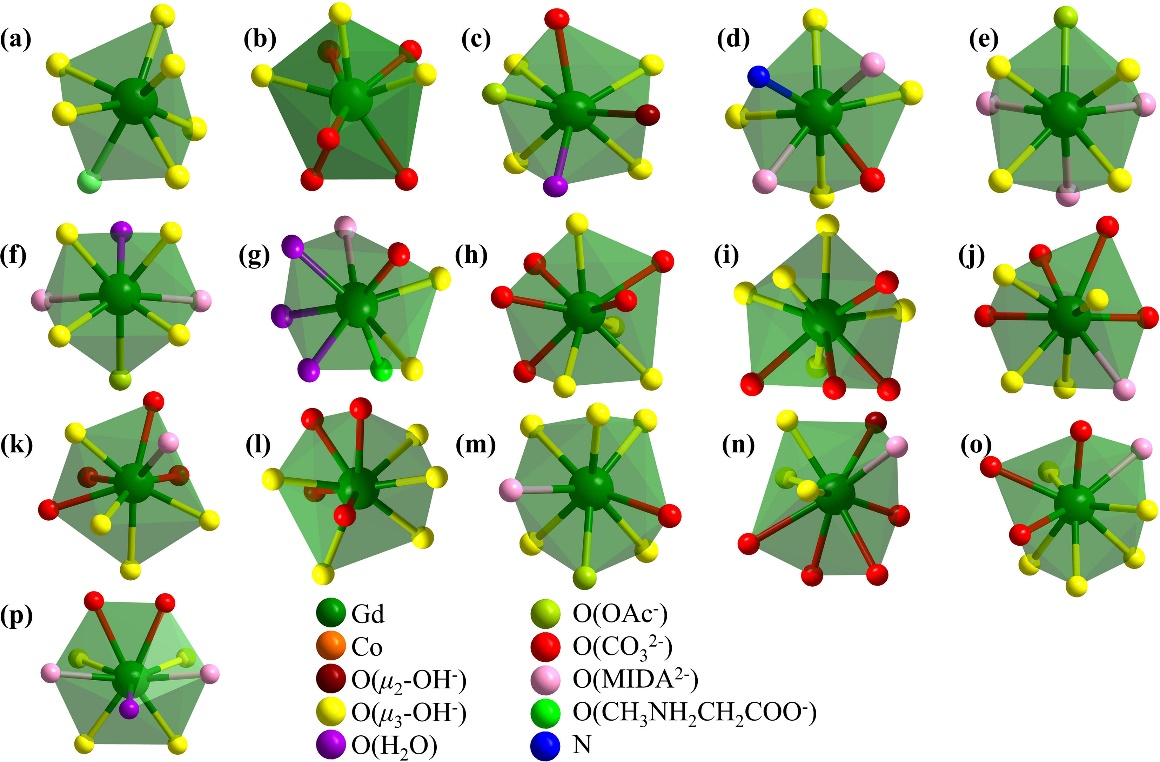
**

**Figure** **S7.** The coordination modes of Gd ions in compounds **Cl12@Gd158Co38**.

As shown in Figure S7a, Gd ion is **seven-coordination**, lined with seven O atoms (from six *μ*3-OH-, and one sarcosine).

As shown in Figure S7b-7h, Gd ions are all **eight-coordination**, showing **seven coordination modes**. Gd (Figure S7b) ion is coordinated to eight O (five O-donors from four CO32-, and three O atoms from the *μ*3-OH- groups); Gd (Figure S7c) ion is coordinated to eight O (from one CO32-, one *μ*2-OH-, four *μ*3-OH-, one H2O, and one CH3COO-); Gd (Figure S7d) ion is coordinated to eight O (from six *μ*3-OH-, one MIDA2-, and one CH3COO-); Gd (Figure S7e) ion is coordinated to seven O and one N (from one CO32-, four *μ*3-OH-, and one MIDA2-); Gd (Figure S7f) ion is coordinated to eight O (from four *μ*3-OH-, three H2MIDA ligands, and one CH3COO-); Gd (Figure S7g) ion is coordinated to eight O (from four *μ*3-OH-, one H2O, two H2MIDA ligands, and one CH3COO-); Gd (Figure S7h) ion is coordinated to eight O (from one CO32-, two *μ*3-OH-, three H2O, one MIDA2- ligand, and one sarcosine).

The rest of Gd ions are all **nine-coordination** (as shown in Figure S7i-7p), showing **eight** coordination modes: (I) Gd (Figure S7i) ion is both coordinated with nine O atoms (from six CO32-, and three *μ*3-OH- groups); (II) Gd (Figure S7j) ion is coordinated with nine O atoms (from three CO32-, and five *μ*3-OH- groups); (III) Gd (Figure S7k) ion is coordinated with nine O atoms (from four CO32-, and four *μ*3-OH- groups); (IV) Gd (Figure S7l) ion is coordinated with nine O atoms (from three CO32-, one CH3COO-, and four *μ*3-OH- groups); (V) Gd (Figure S7m) ion is coordinated with nine O atoms (from three CO32-, one *μ*2-OH-, and four *μ*3-OH- groups); (VI) Gd (Figure S7n) ion is coordinated with nine O atoms (from three CO32-, one CH3COO-, one *μ*2-OH-, and three *μ*3-OH- groups); (VII) Gd (Figure S7o) ion is coordinated with nine O atoms (from three CO32-, one MIDA2- ligand, and four *μ*3-OH- groups); (VIII) Gd (Figure S7p) ion is coordinated with nine O atoms (from one CO32-, two MIDA2- ligands, one H2O, and four *μ*3-OH- groups).

The Crystal Structure Figures


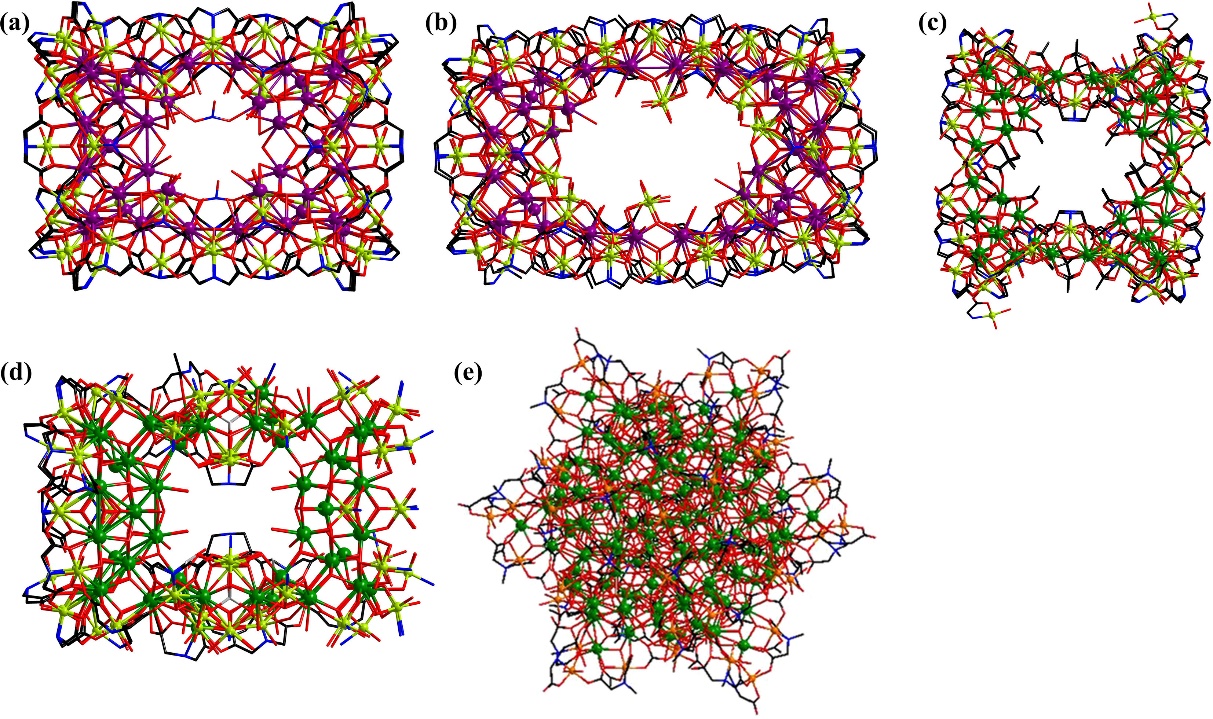


**Figure** **S8.** The view of compounds La76Ni88 (a)7; La68Ni90 (b)7; Gd96Ni64 (c)8; Gd78Ni64 (d)9; **Cl12@Gd158Co38** (e). Color code: green, Gd; purple, La; orange, Co; lime, Ni; blue: N; red, O; black, C.

**
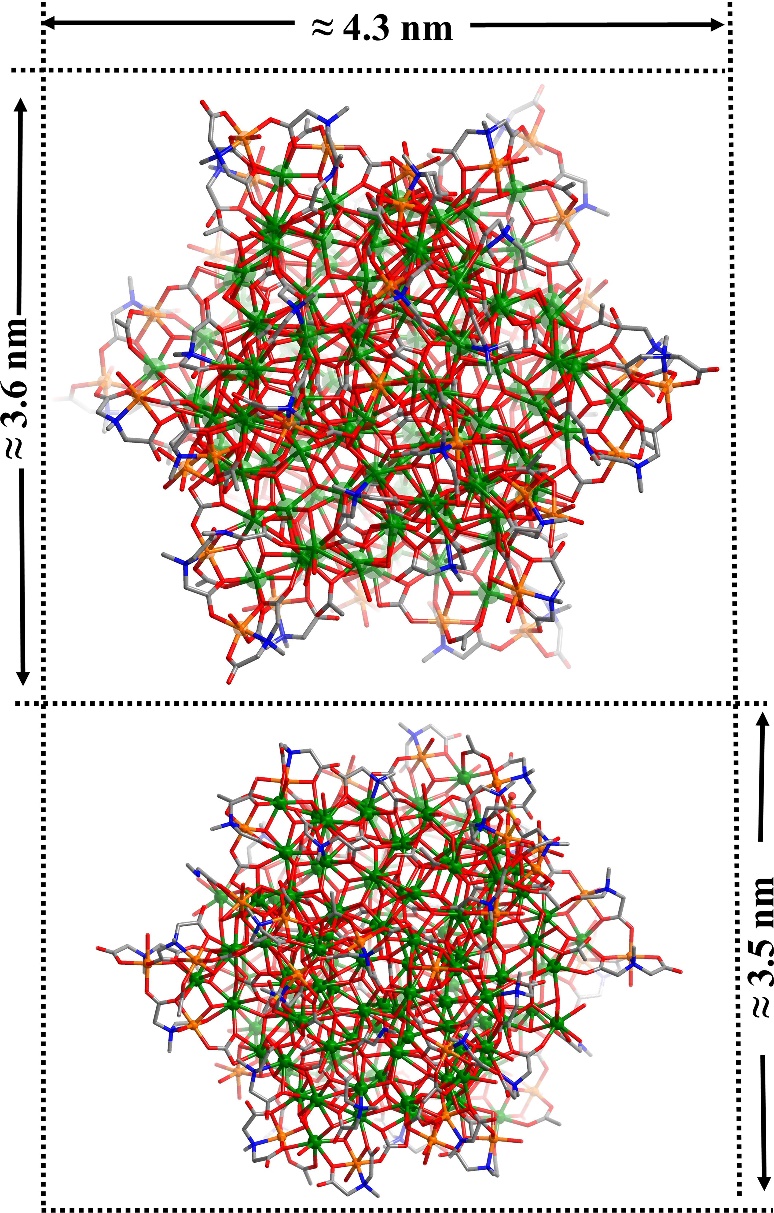
**

**Figure** **S9.** Ball-and-stick views of the cationic **Cl12@Gd158Co38**.

**
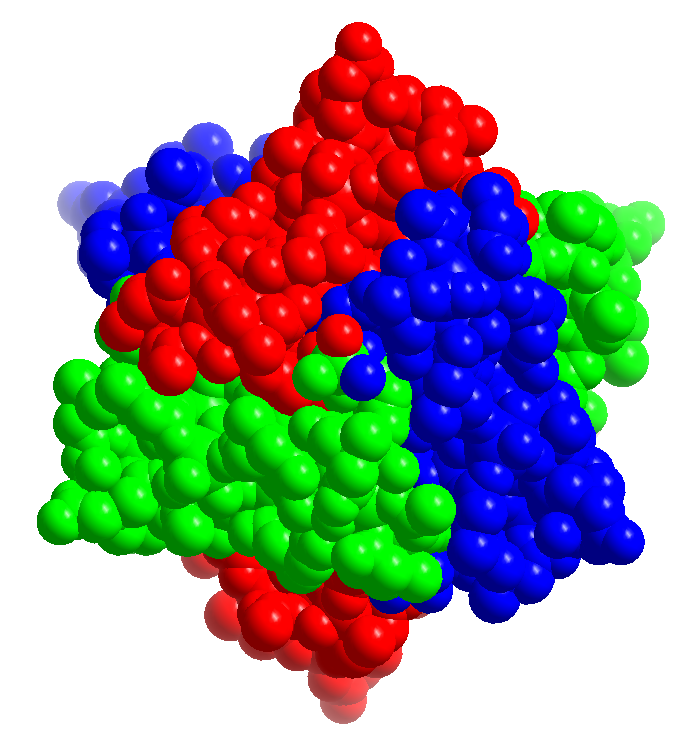
**

**Figure** **S10.** The space-filling view of compound **Cl12@Gd158Co38**.


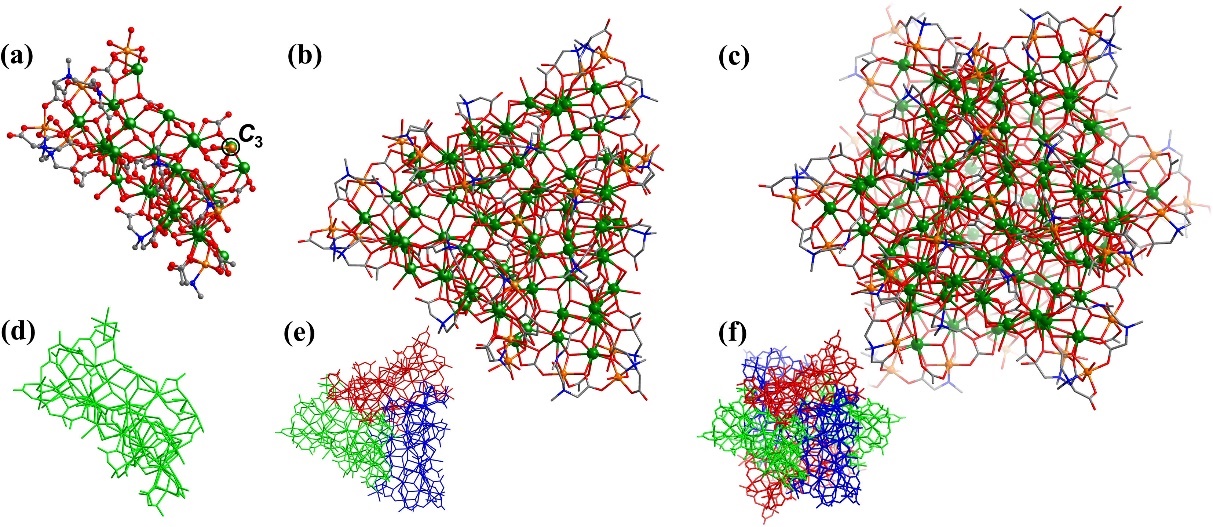


**Figure** **S11.** Ball-and-stick view and the arrangement of asymmetric building block **Gd27Co7** (a, d); ball-and-stick view and the arrangement of **Gd79Co19** (b, e); Ball-and-stick view and the arrangement of **Cl12@Gd158Co38** (c, f).


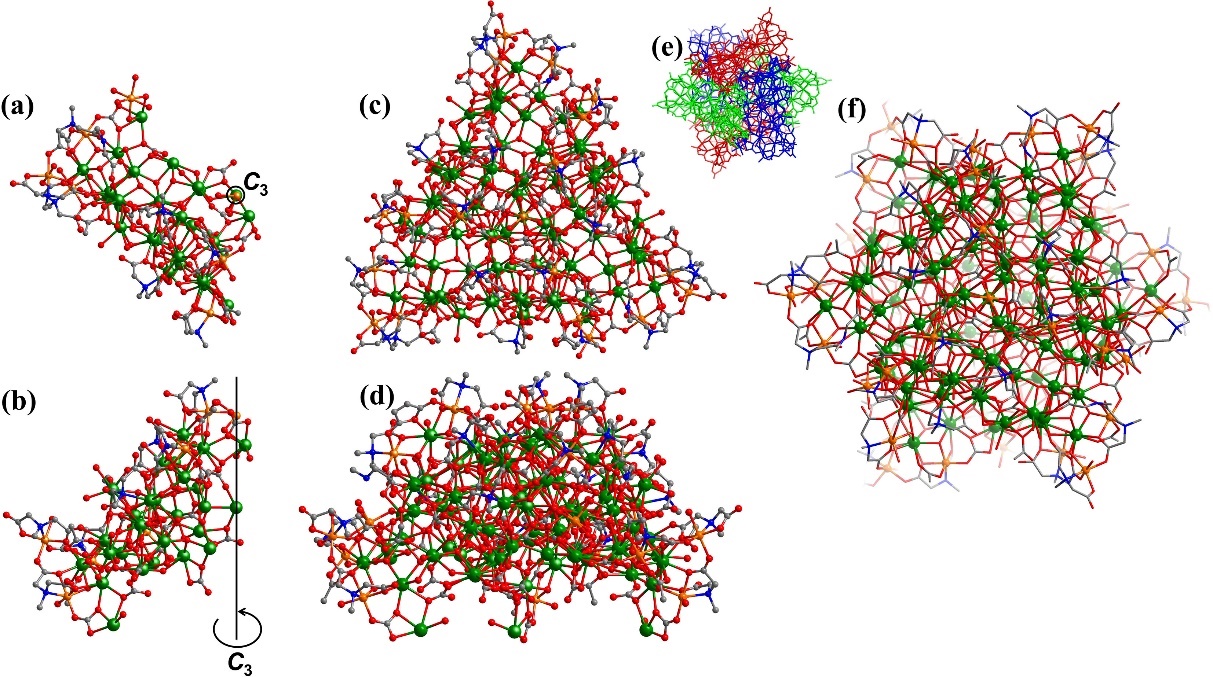


**Figure** **S12.** Ball-and-stick view of asymmetric building block **Gd27Co7** (a, b); ball-and-stick view of **Gd79Co19** (c, d); Ball-and-stick view and the arrangement of **Cl12@Gd158Co38** (e, f).


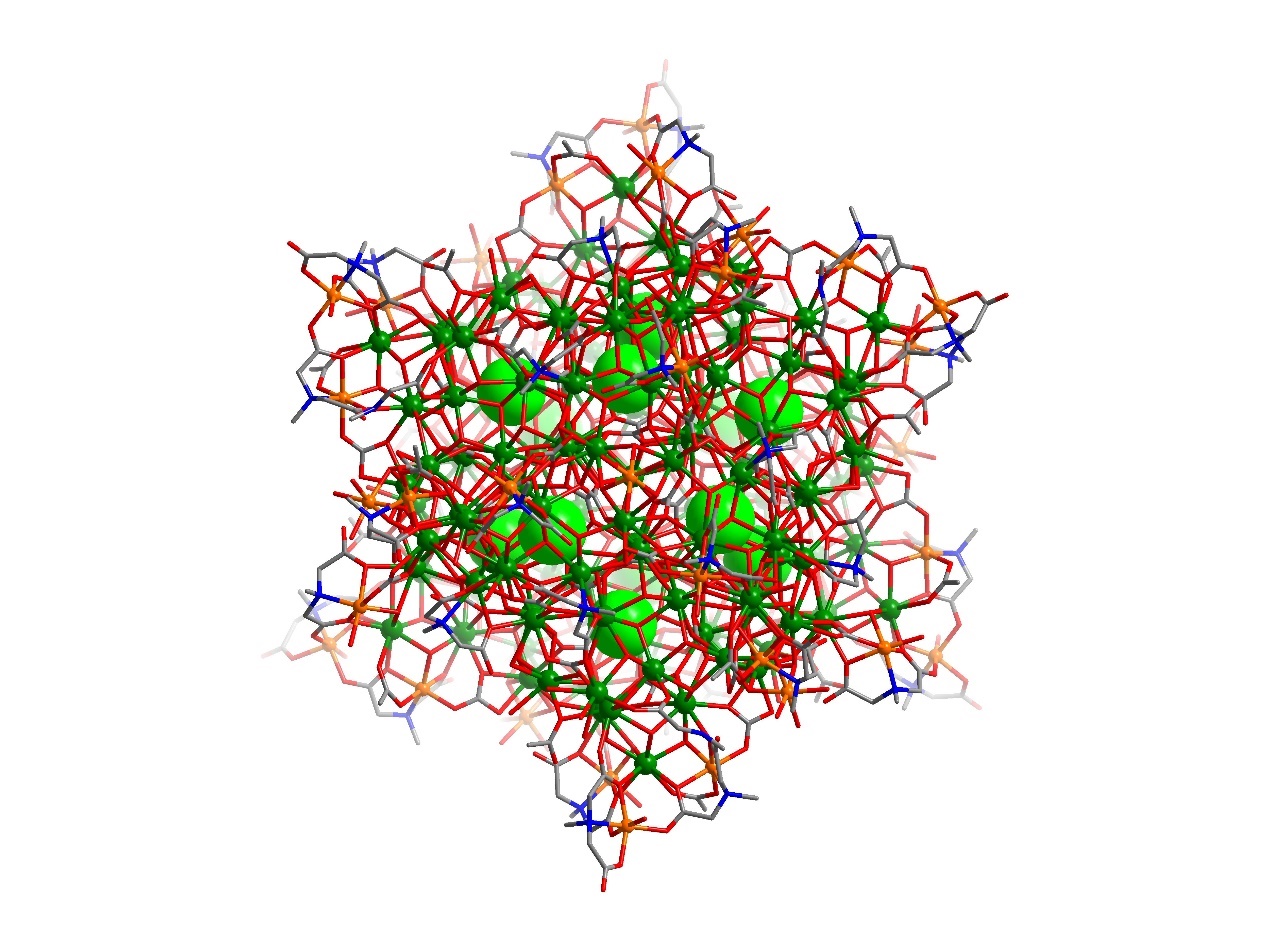


**Figure** **S13.** The arrangement of compound **Cl12@Gd158Co38**.

**
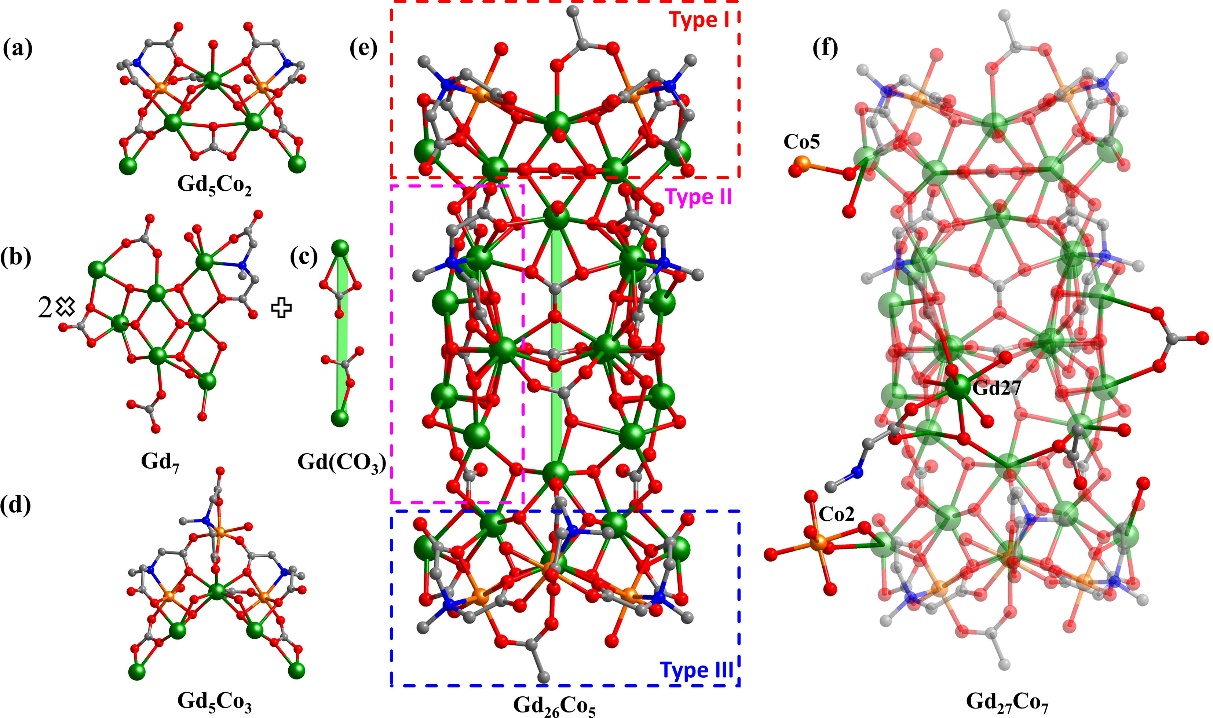
**

**Figure S14.** Ball-and-stick view of **Gd5Co2** (a); **Gd7** (b); **Gd(CO3)** (c); **Gd5Co3** (d); **Gd26Co5** (e); **Gd27Co7** (f). Color code: green, Gd; orange, Co; blue: N; red, O; gray, C. H, Cl atoms and free H2O molecules are omitted for clarity.


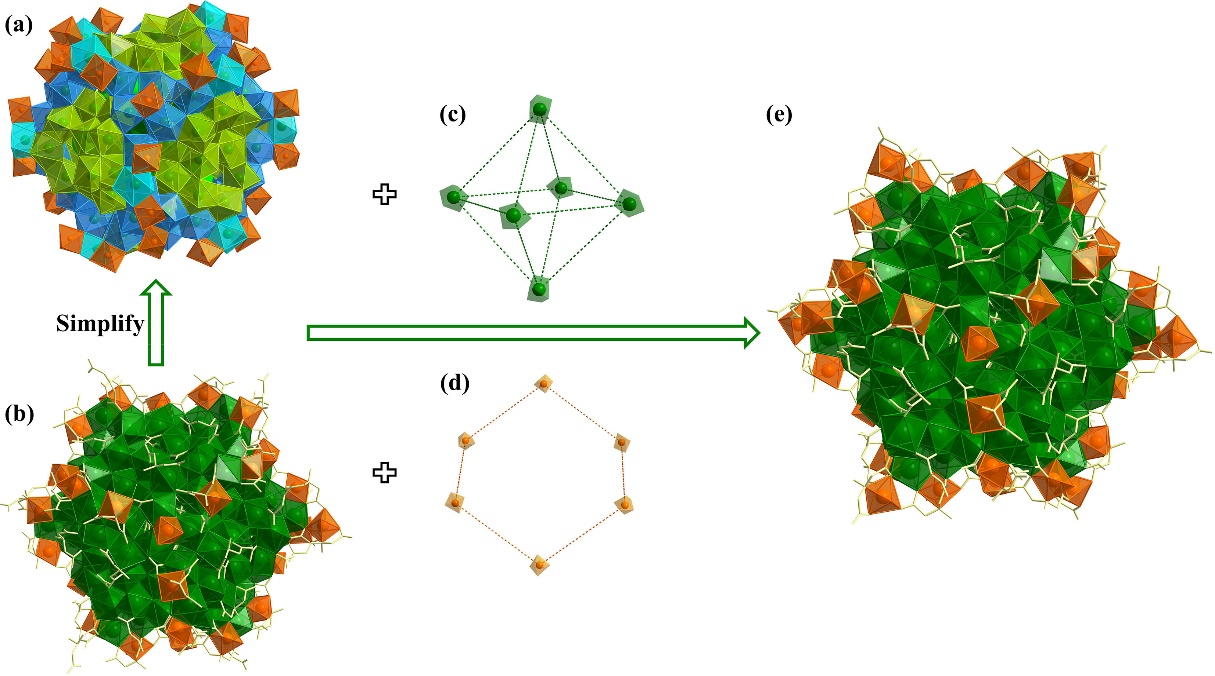


**Figure** **S15.** The view of compound **Gd152Co32** (a), (b); Gd(MIDA)2(CO3)(*μ*3-OH)2 (c); Co(MIDA)3 (d); **Cl12@Gd158Co38** (e).


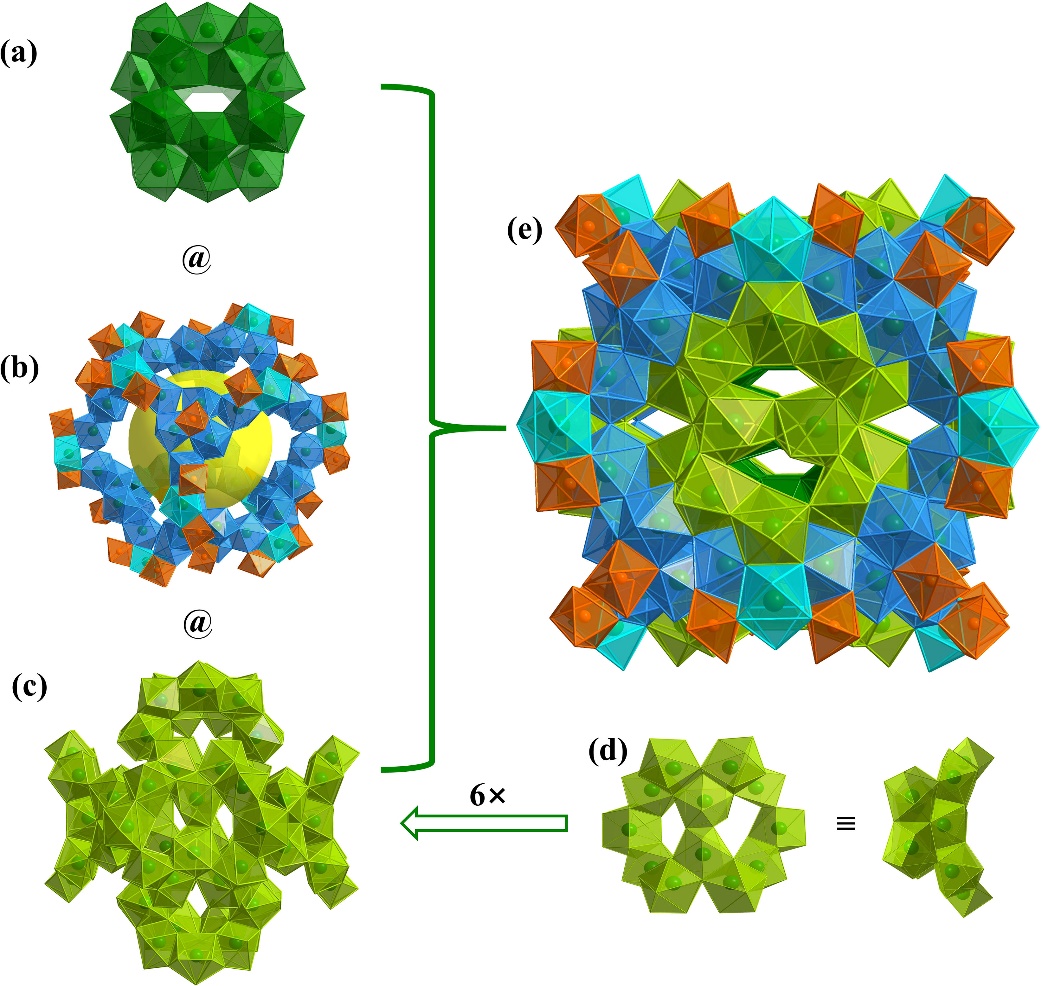


**Figure** **S16.** The view of compound **Gd20** (a); **Gd48Co32@(Gd)12** (b); **(Gd12)6** (c); **Gd12** (d); **Gd152Co32** (e).

**
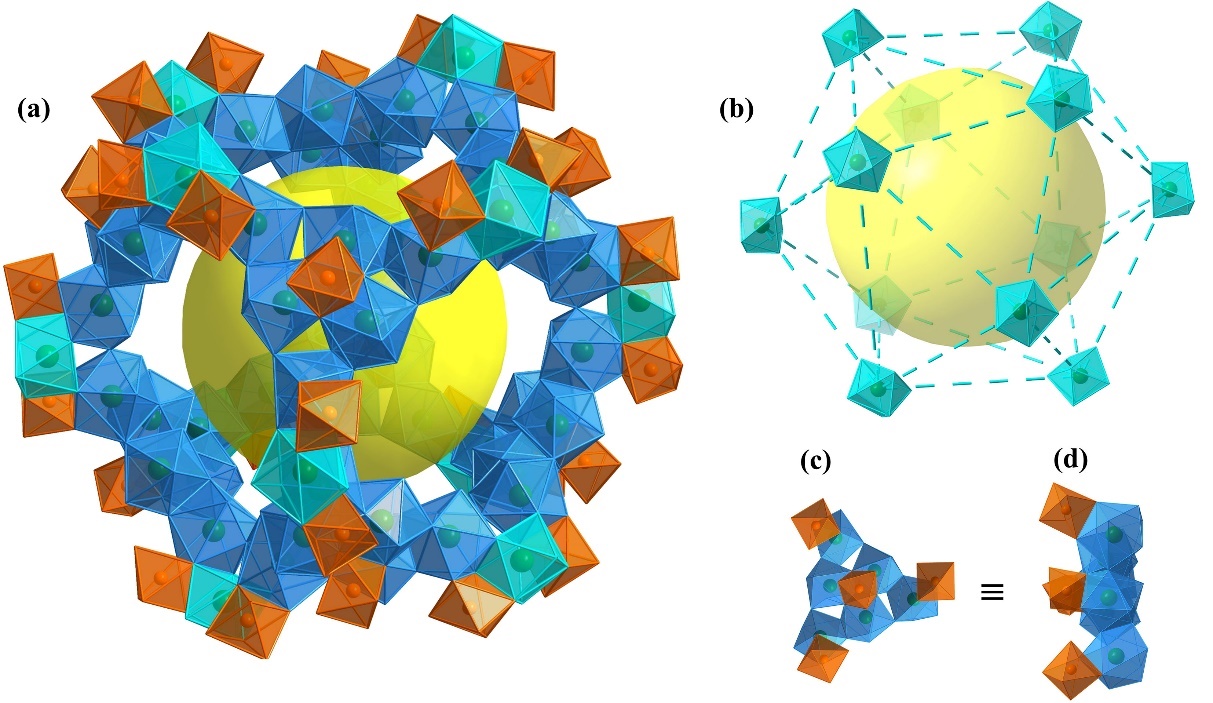
**

**Figure** **S17.** The view of compound **Gd48Co32@(Gd)12** (a); **Gd12** (b); **Gd6Co4** (c), (d).


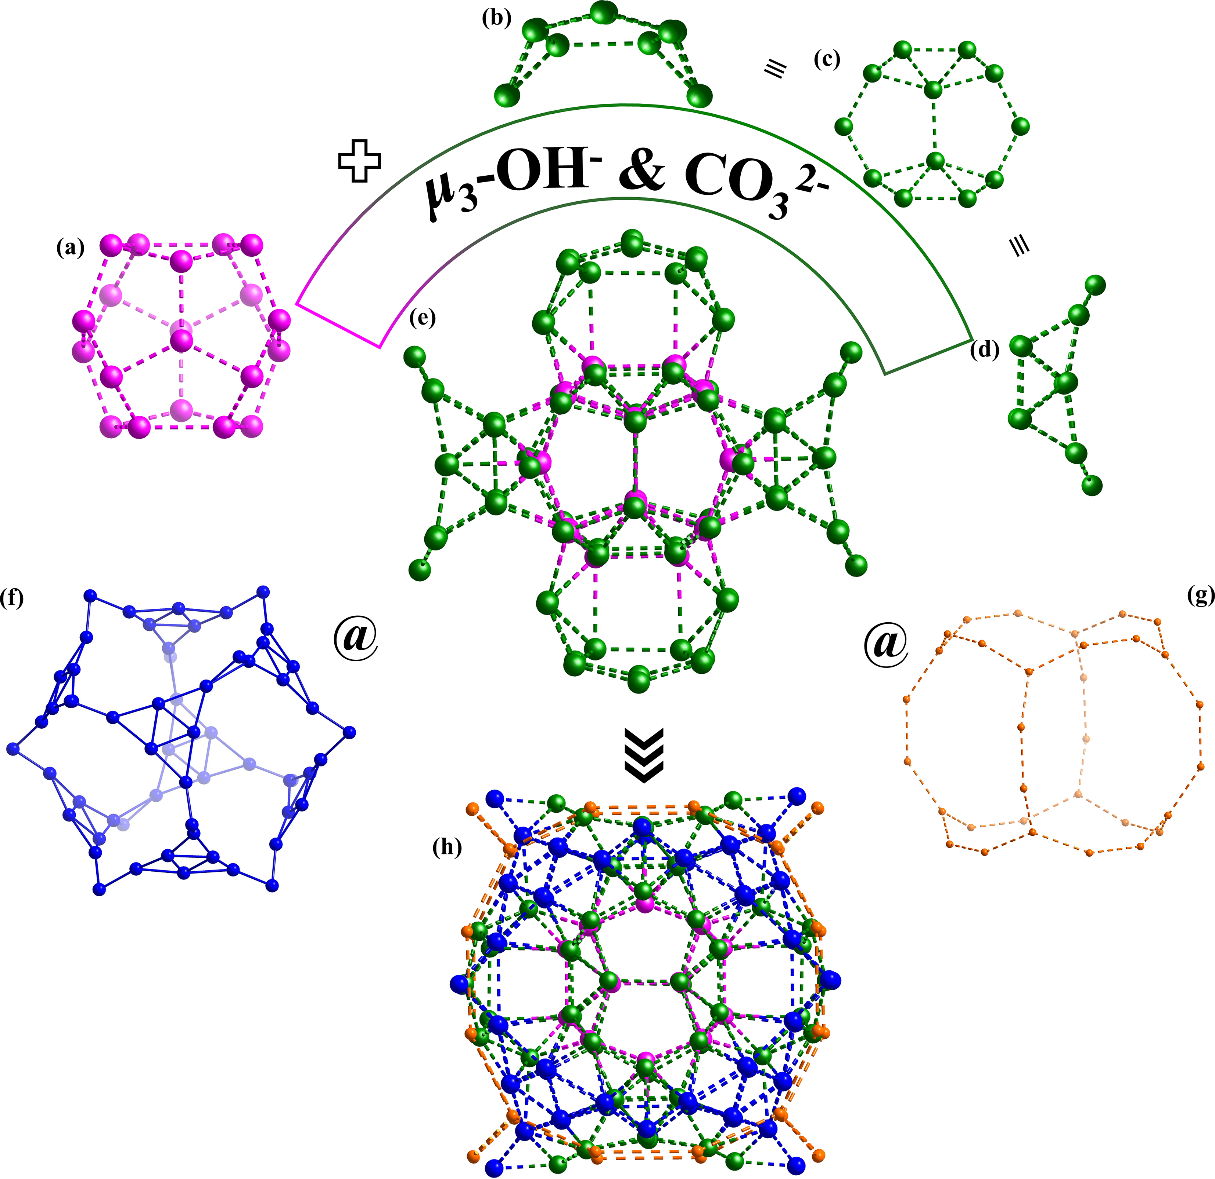


**Figure** **S18.** The view of compound **Gd20** (a); **Gd12** (b), (c), (d); **Gd92** (e); **Gd60** (f); **Co32** (g); **Gd152Co32** (h).


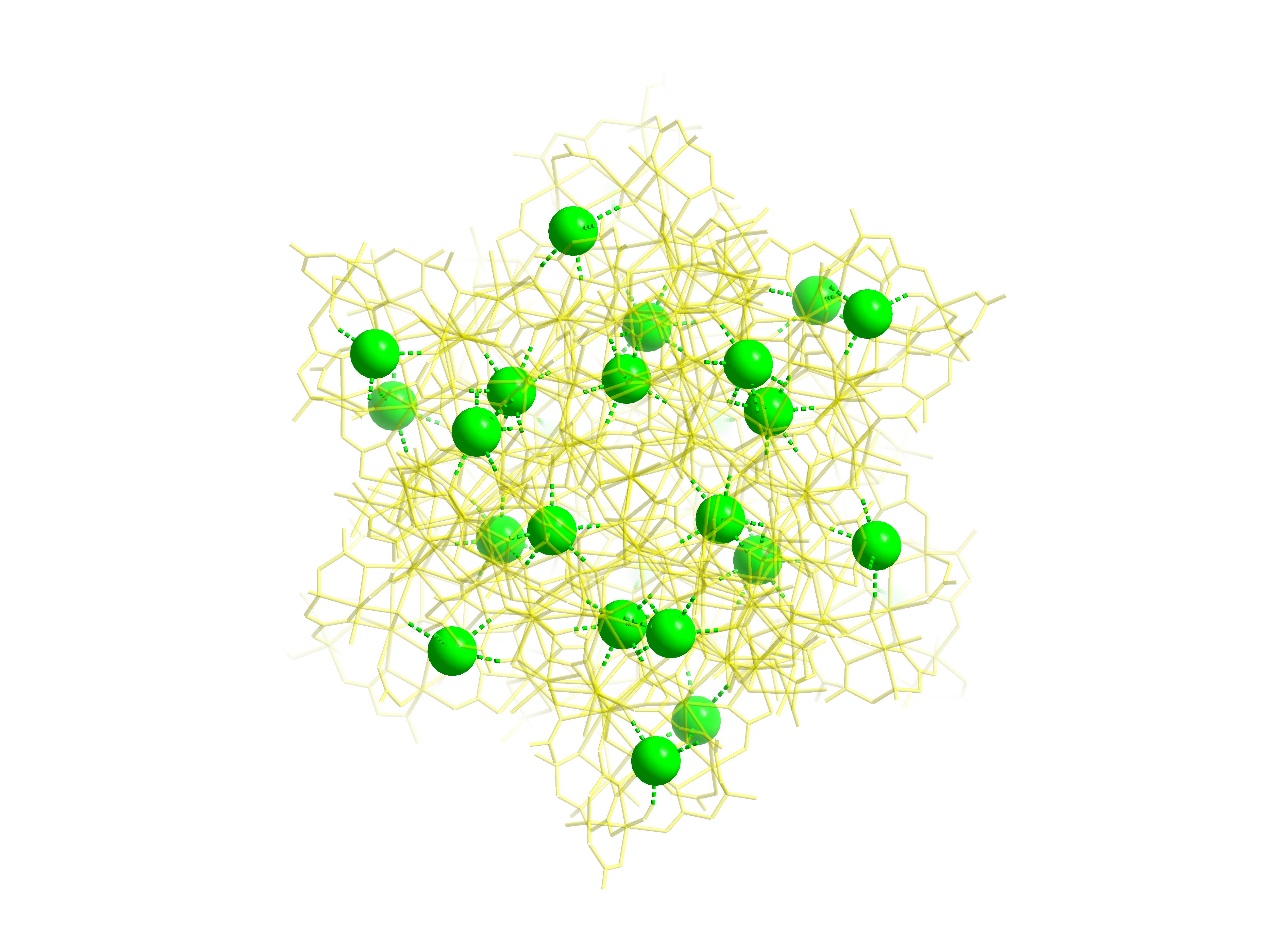


**Figure** **S19.** The view of compound **Cl12@Gd158Co38**. Color code: bright green, Cl; bond with bright green, Cl···H.


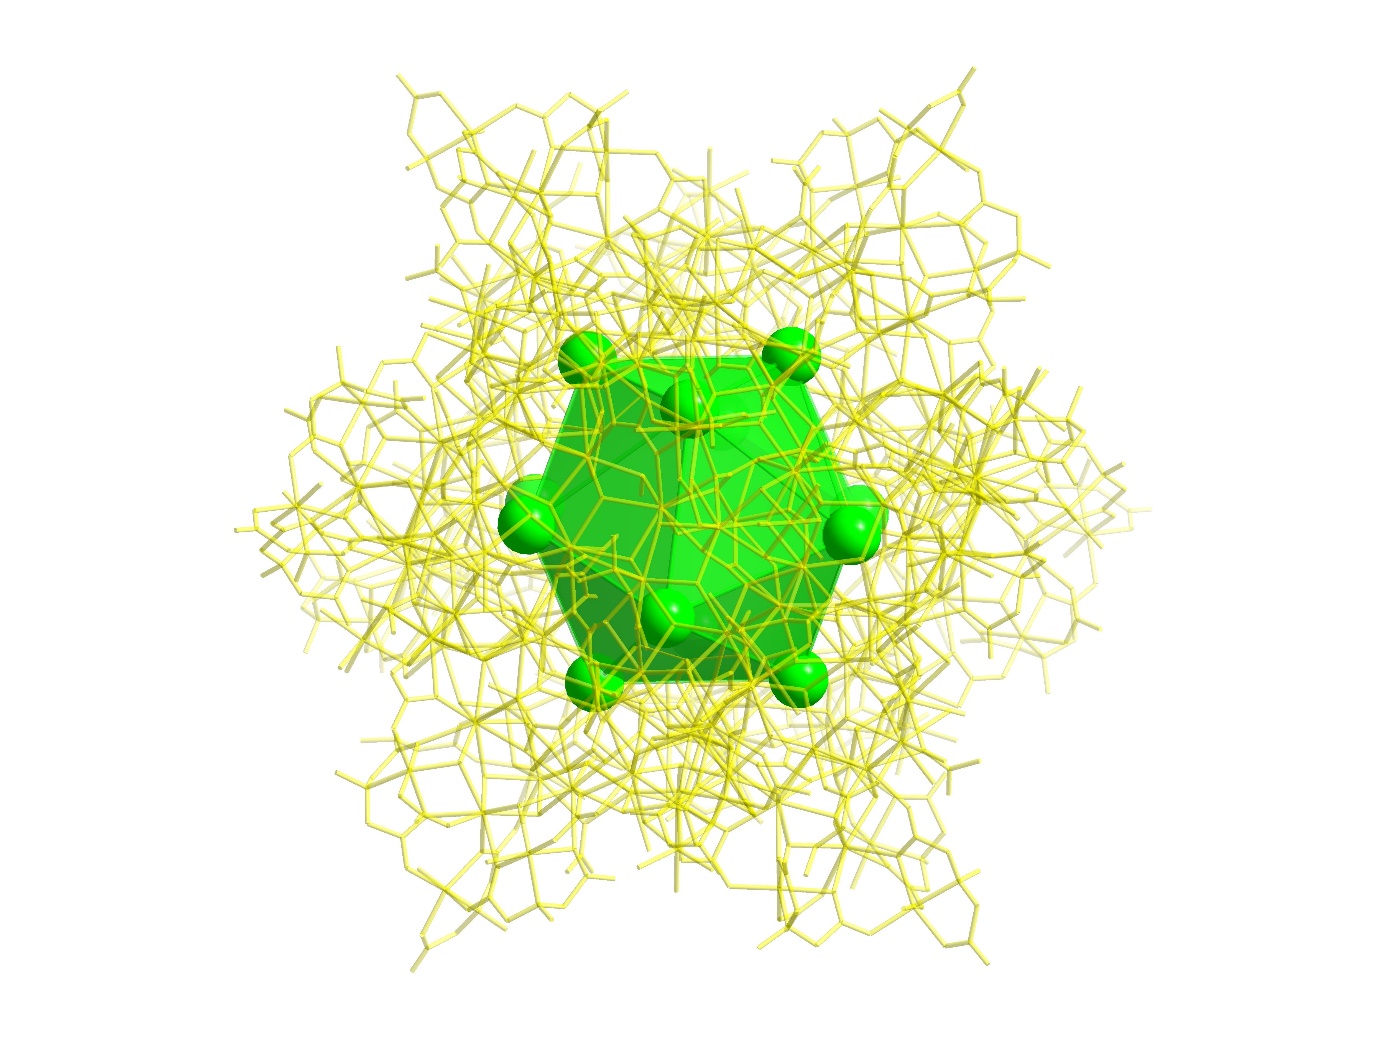


**Figure** **S20.** The view of compound **Cl12@Gd158Co38** templated by [Cl12]12-. Color code: bright green, Cl.


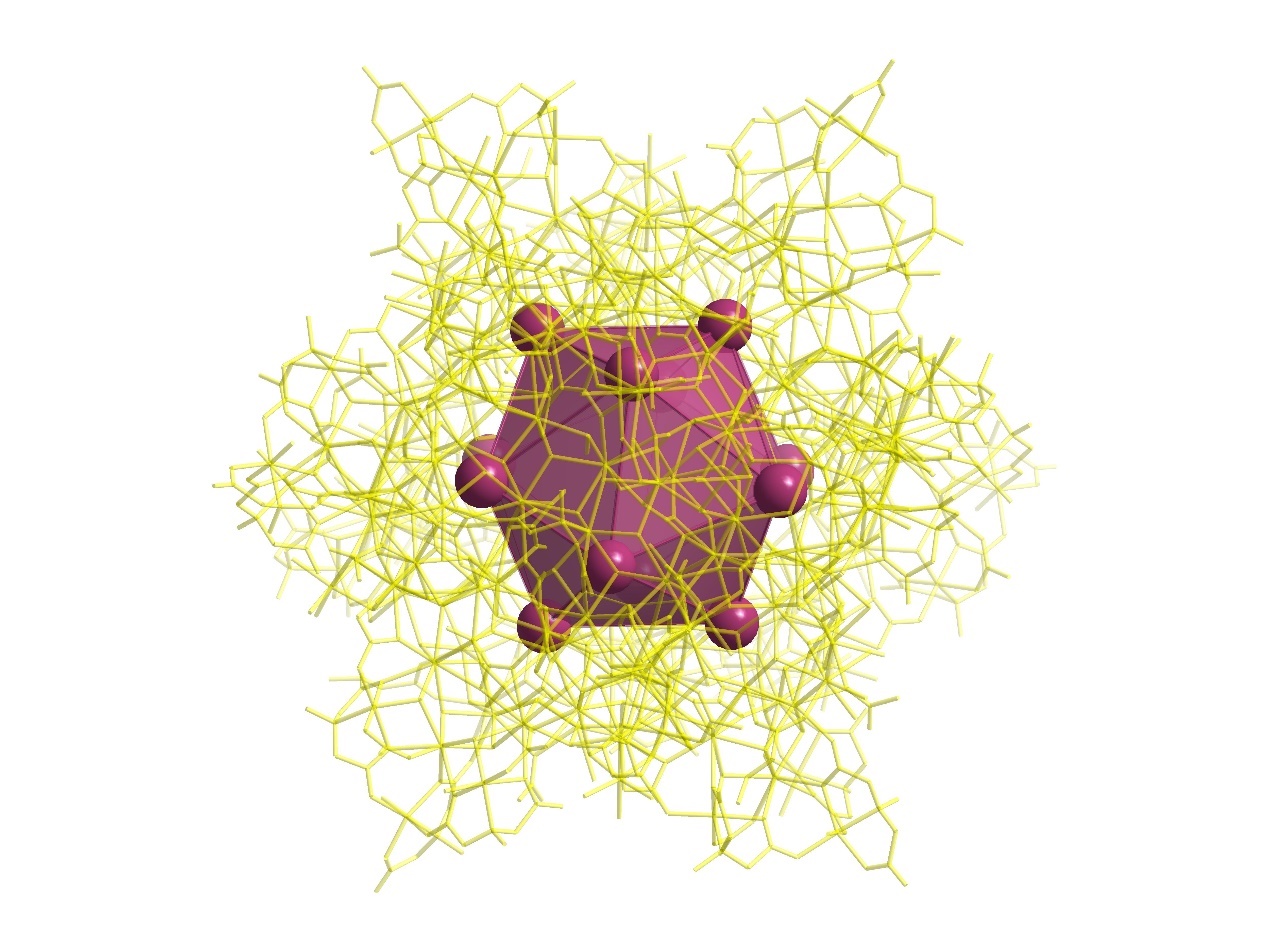


**Figure** **S21.** The view of compound **Br12@Gd158Co38** templated by [Br12]12-. Color code: plum, Br.


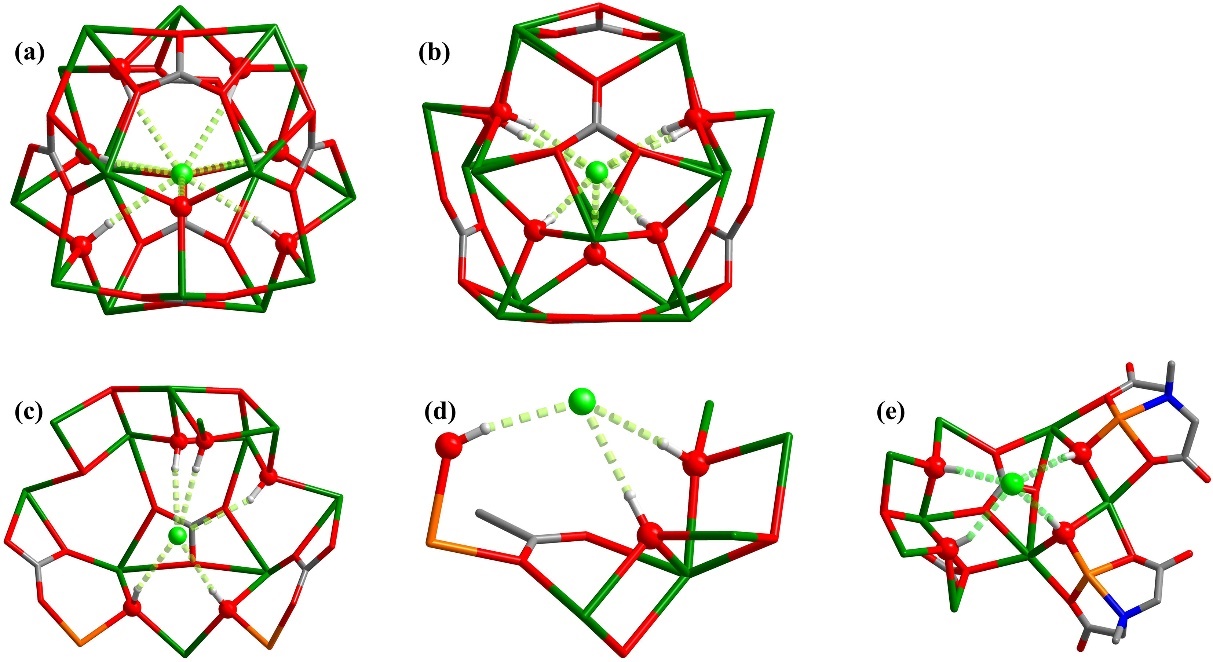


**Figure** **S22.** Ball-and-stick view of Gd16(CO3)6(*μ*3-OH)7 templated by crystallographically independent Cl1 (a) and Cl2 (b); ball-and-stick view of Gd11Co2(CO3)3(μ3-OH)8 is templated by crystallographically independent Cl3 (c); Gd5Co(OAC)(*μ*3-OH)5 is templated by crystallographically independent Cl4 (d); Gd8Co2(MIDA)2(CO3)2(μ3-OH)5 is templated by crystallographically independent Cl5 (e).

**
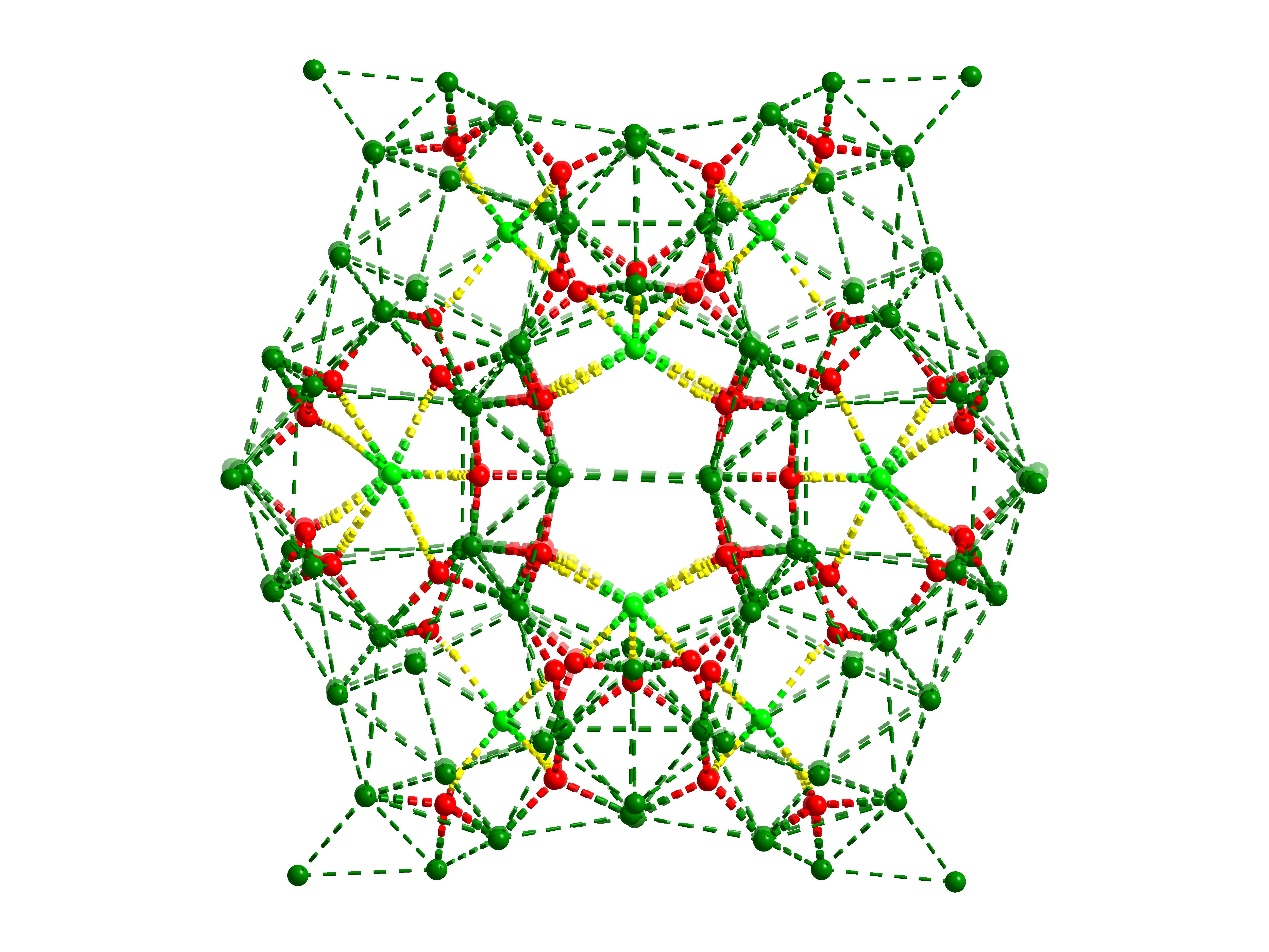
**

**Figure** **S23.** The view of **Gd158** core templated by [Cl12]12- anion template. Color code: bright green, Cl; red, O; green, Gd; bond with yellow, Cl···H.

As shown in Figure S19, **Cl12@Gd158Co38** was induced by 30 Cl- ions, which act as anion templates and play the important role in the assembly of metal frame. Interesting, Cl1 and Cl2 are found in the inside of the metal structure. Cl3, Cl4, and Cl5 are distributed in the periphery of metal skeleton. Gd16(CO3)6(*μ*3-OH)7 unit is templated by **Cl1** (Figure S22a); Gd16(CO3)6(*μ*3-OH)7 is templated by **Cl2** (Figure S22b); Gd11Co2(CO3)3(*μ*3-OH)8 is templated by **Cl3** (Figure S22c); Gd5Co(OAC)(*μ*3-OH)5 is templated by **Cl4** (Figure S22d); Gd8Co2(MIDA)2(CO3)2(*μ*3-OH)5 is templated by **Cl5** (Figure S22e). (Cl···O from 3.08 Å to 3.69 Å, Cl···H-O from 155.15° to 176.16°).

# Section 4. Characterization

## PXRD


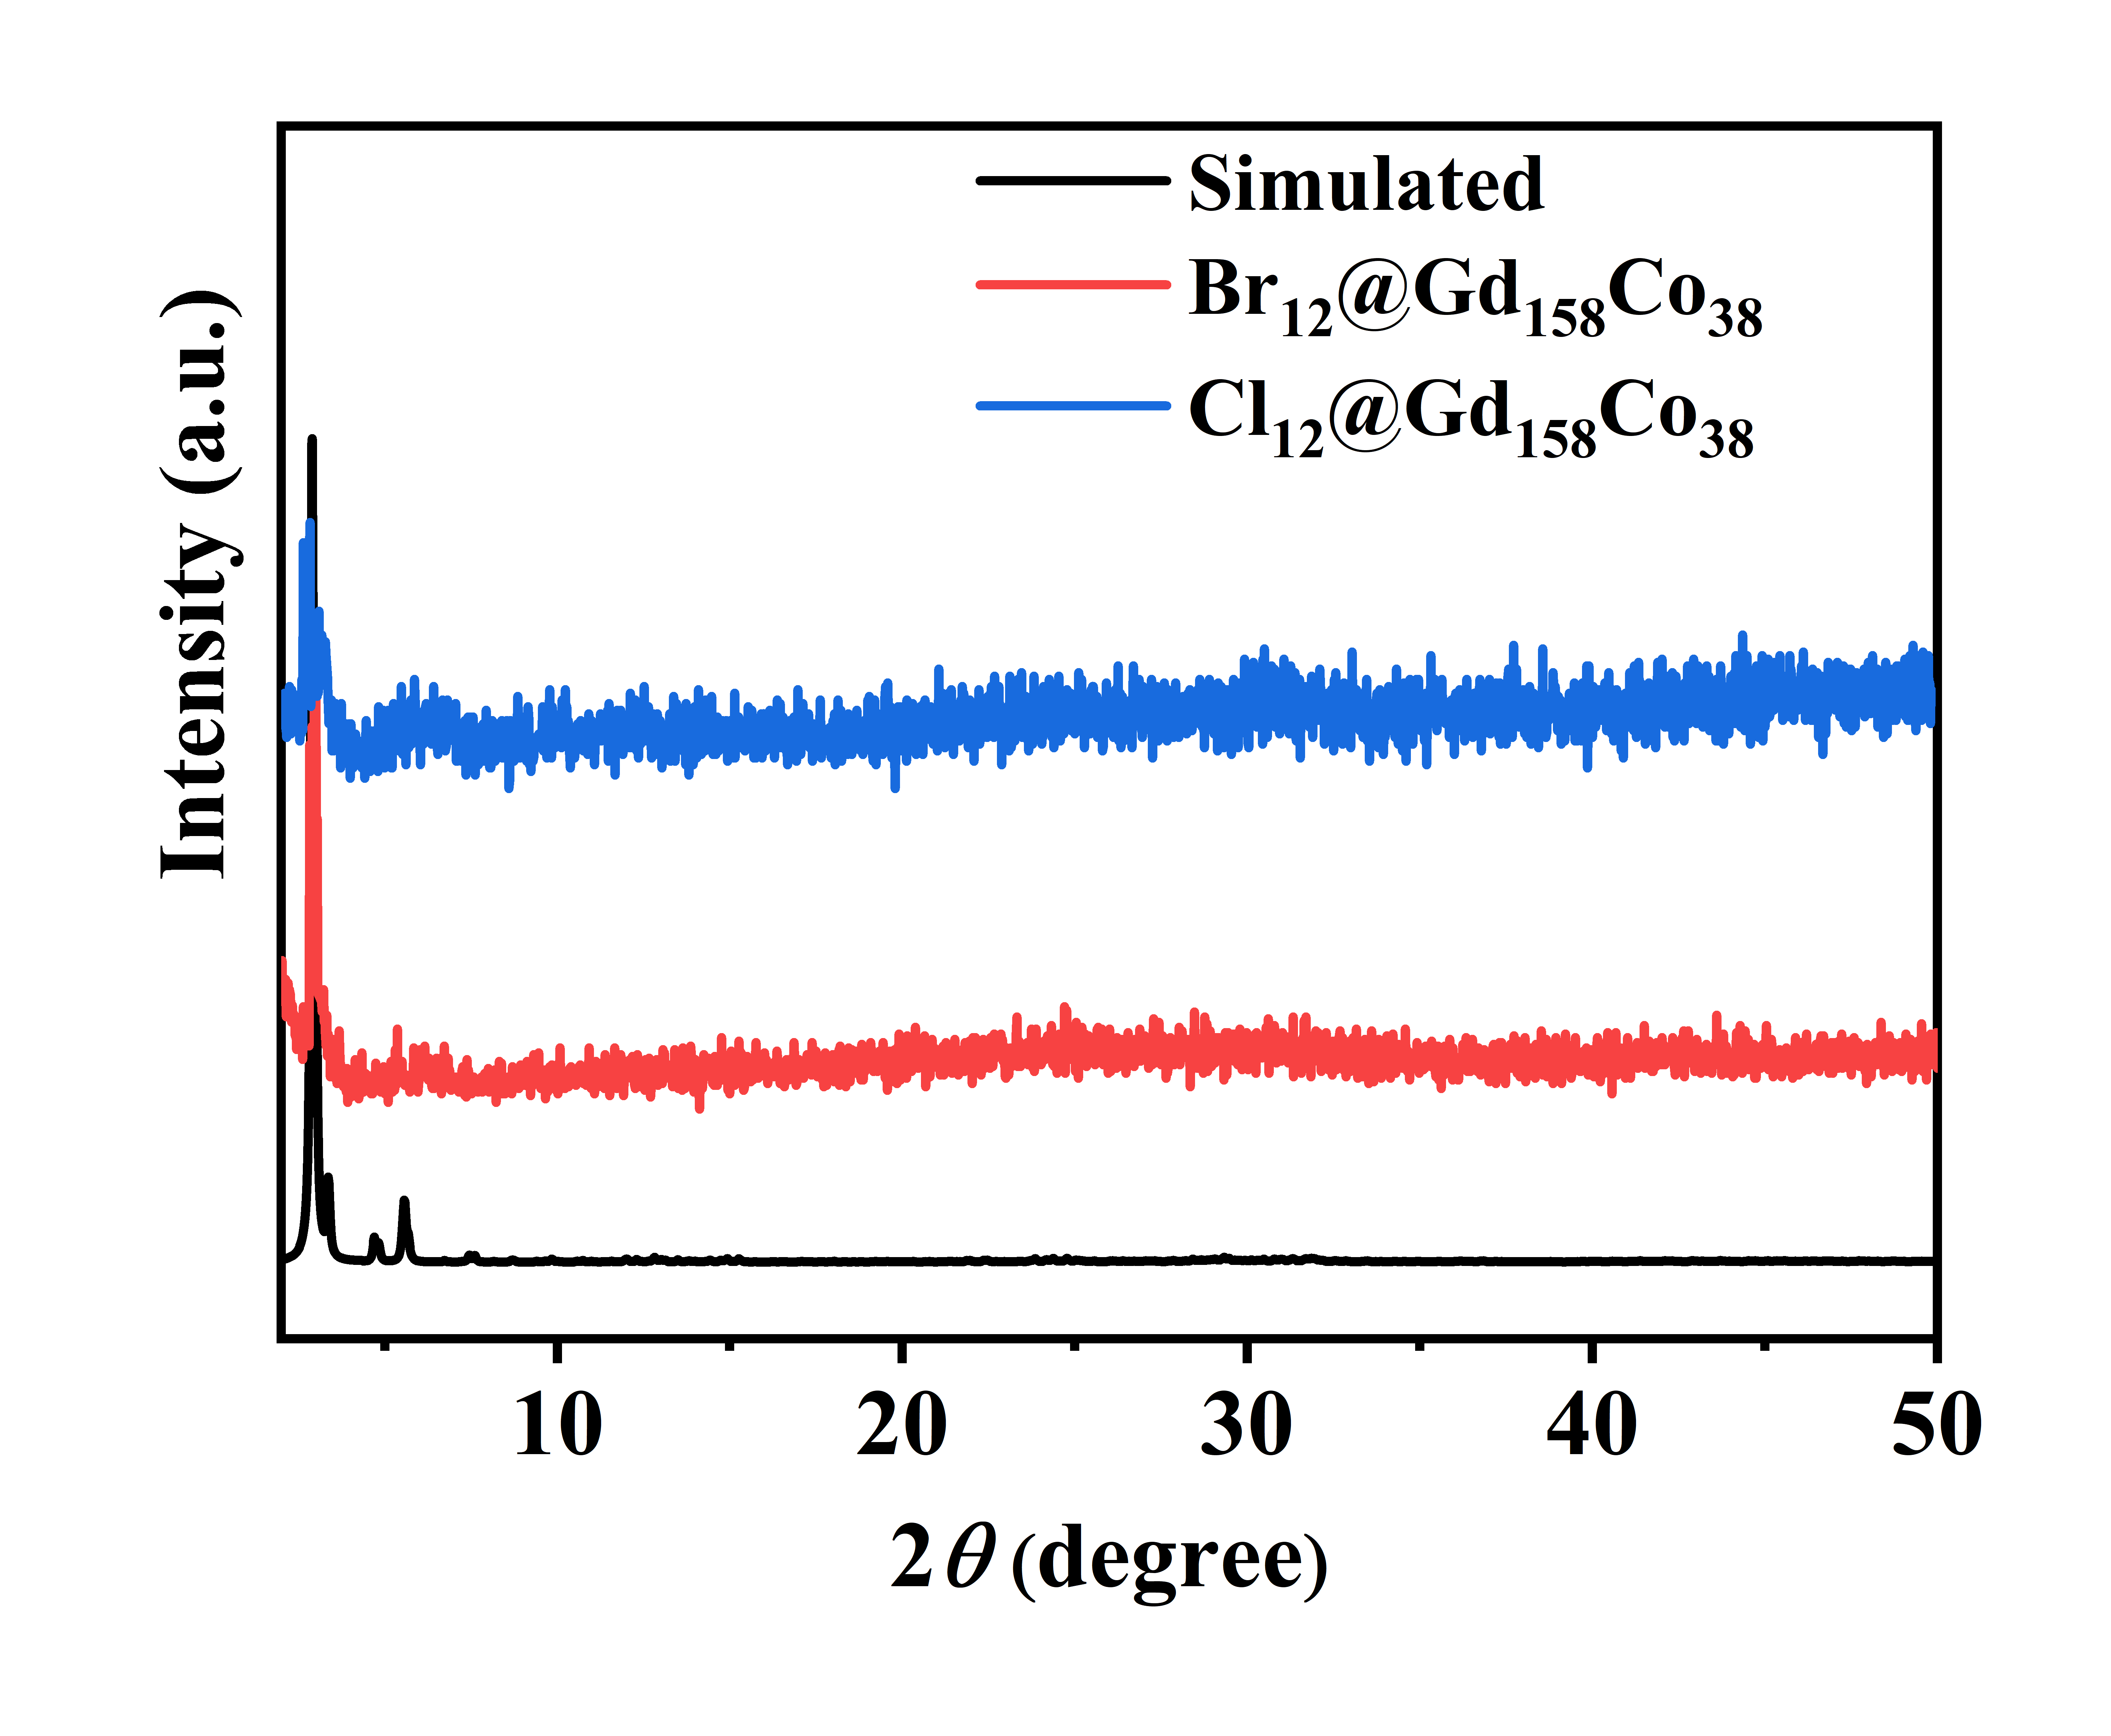


**Figure** **S24.** The simulated and experimental PXRD patterns of **Cl12@Gd158Co38** and **Br12@Gd158Co38**.

PXRD curves were measured with crystalline powder at room temperature. As shown in Figures S24, the experimental curves are likely to the simulated patterns, suggesting that the acquired crystals were pure materials. Meanwhile, the similar curves of Cl12@Gd158Co38 and Br12@Gd158Co38 imply that the structure of two compounds are semblable.

## FT-IR


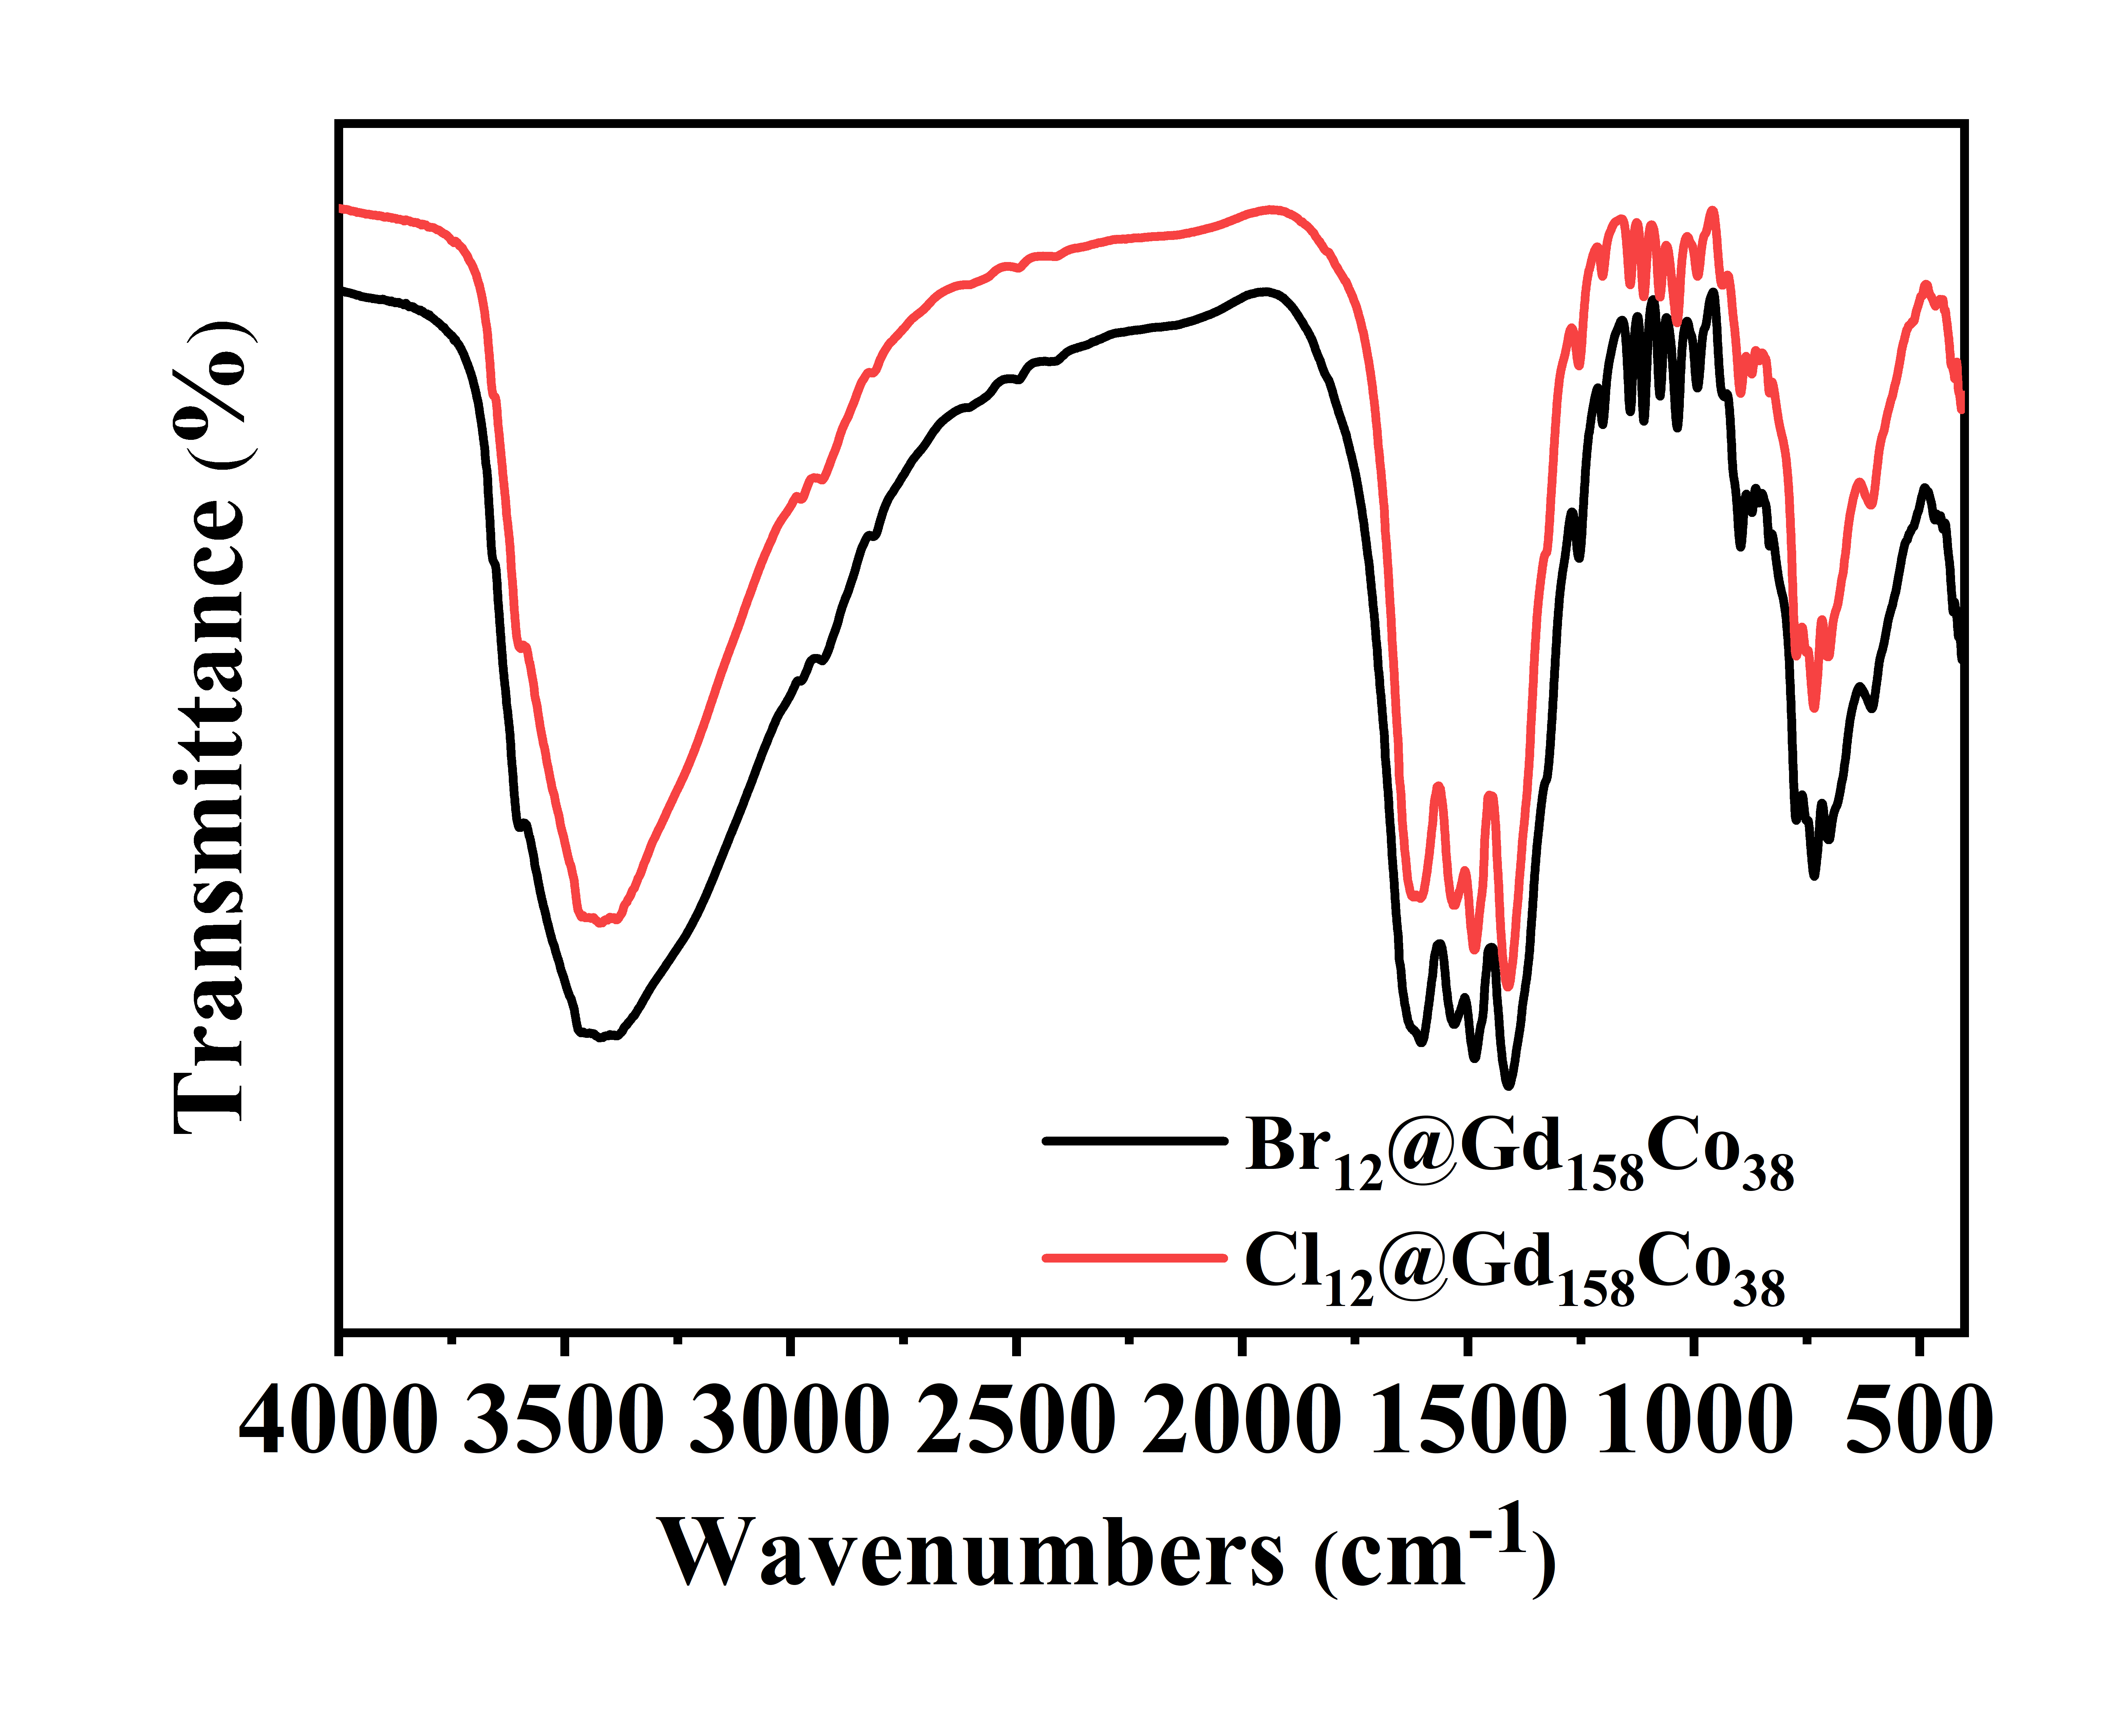


**Figure S25.** FT-IR spectra of of **Cl12@Gd158Co38** and **Br12@Gd158Co38**.


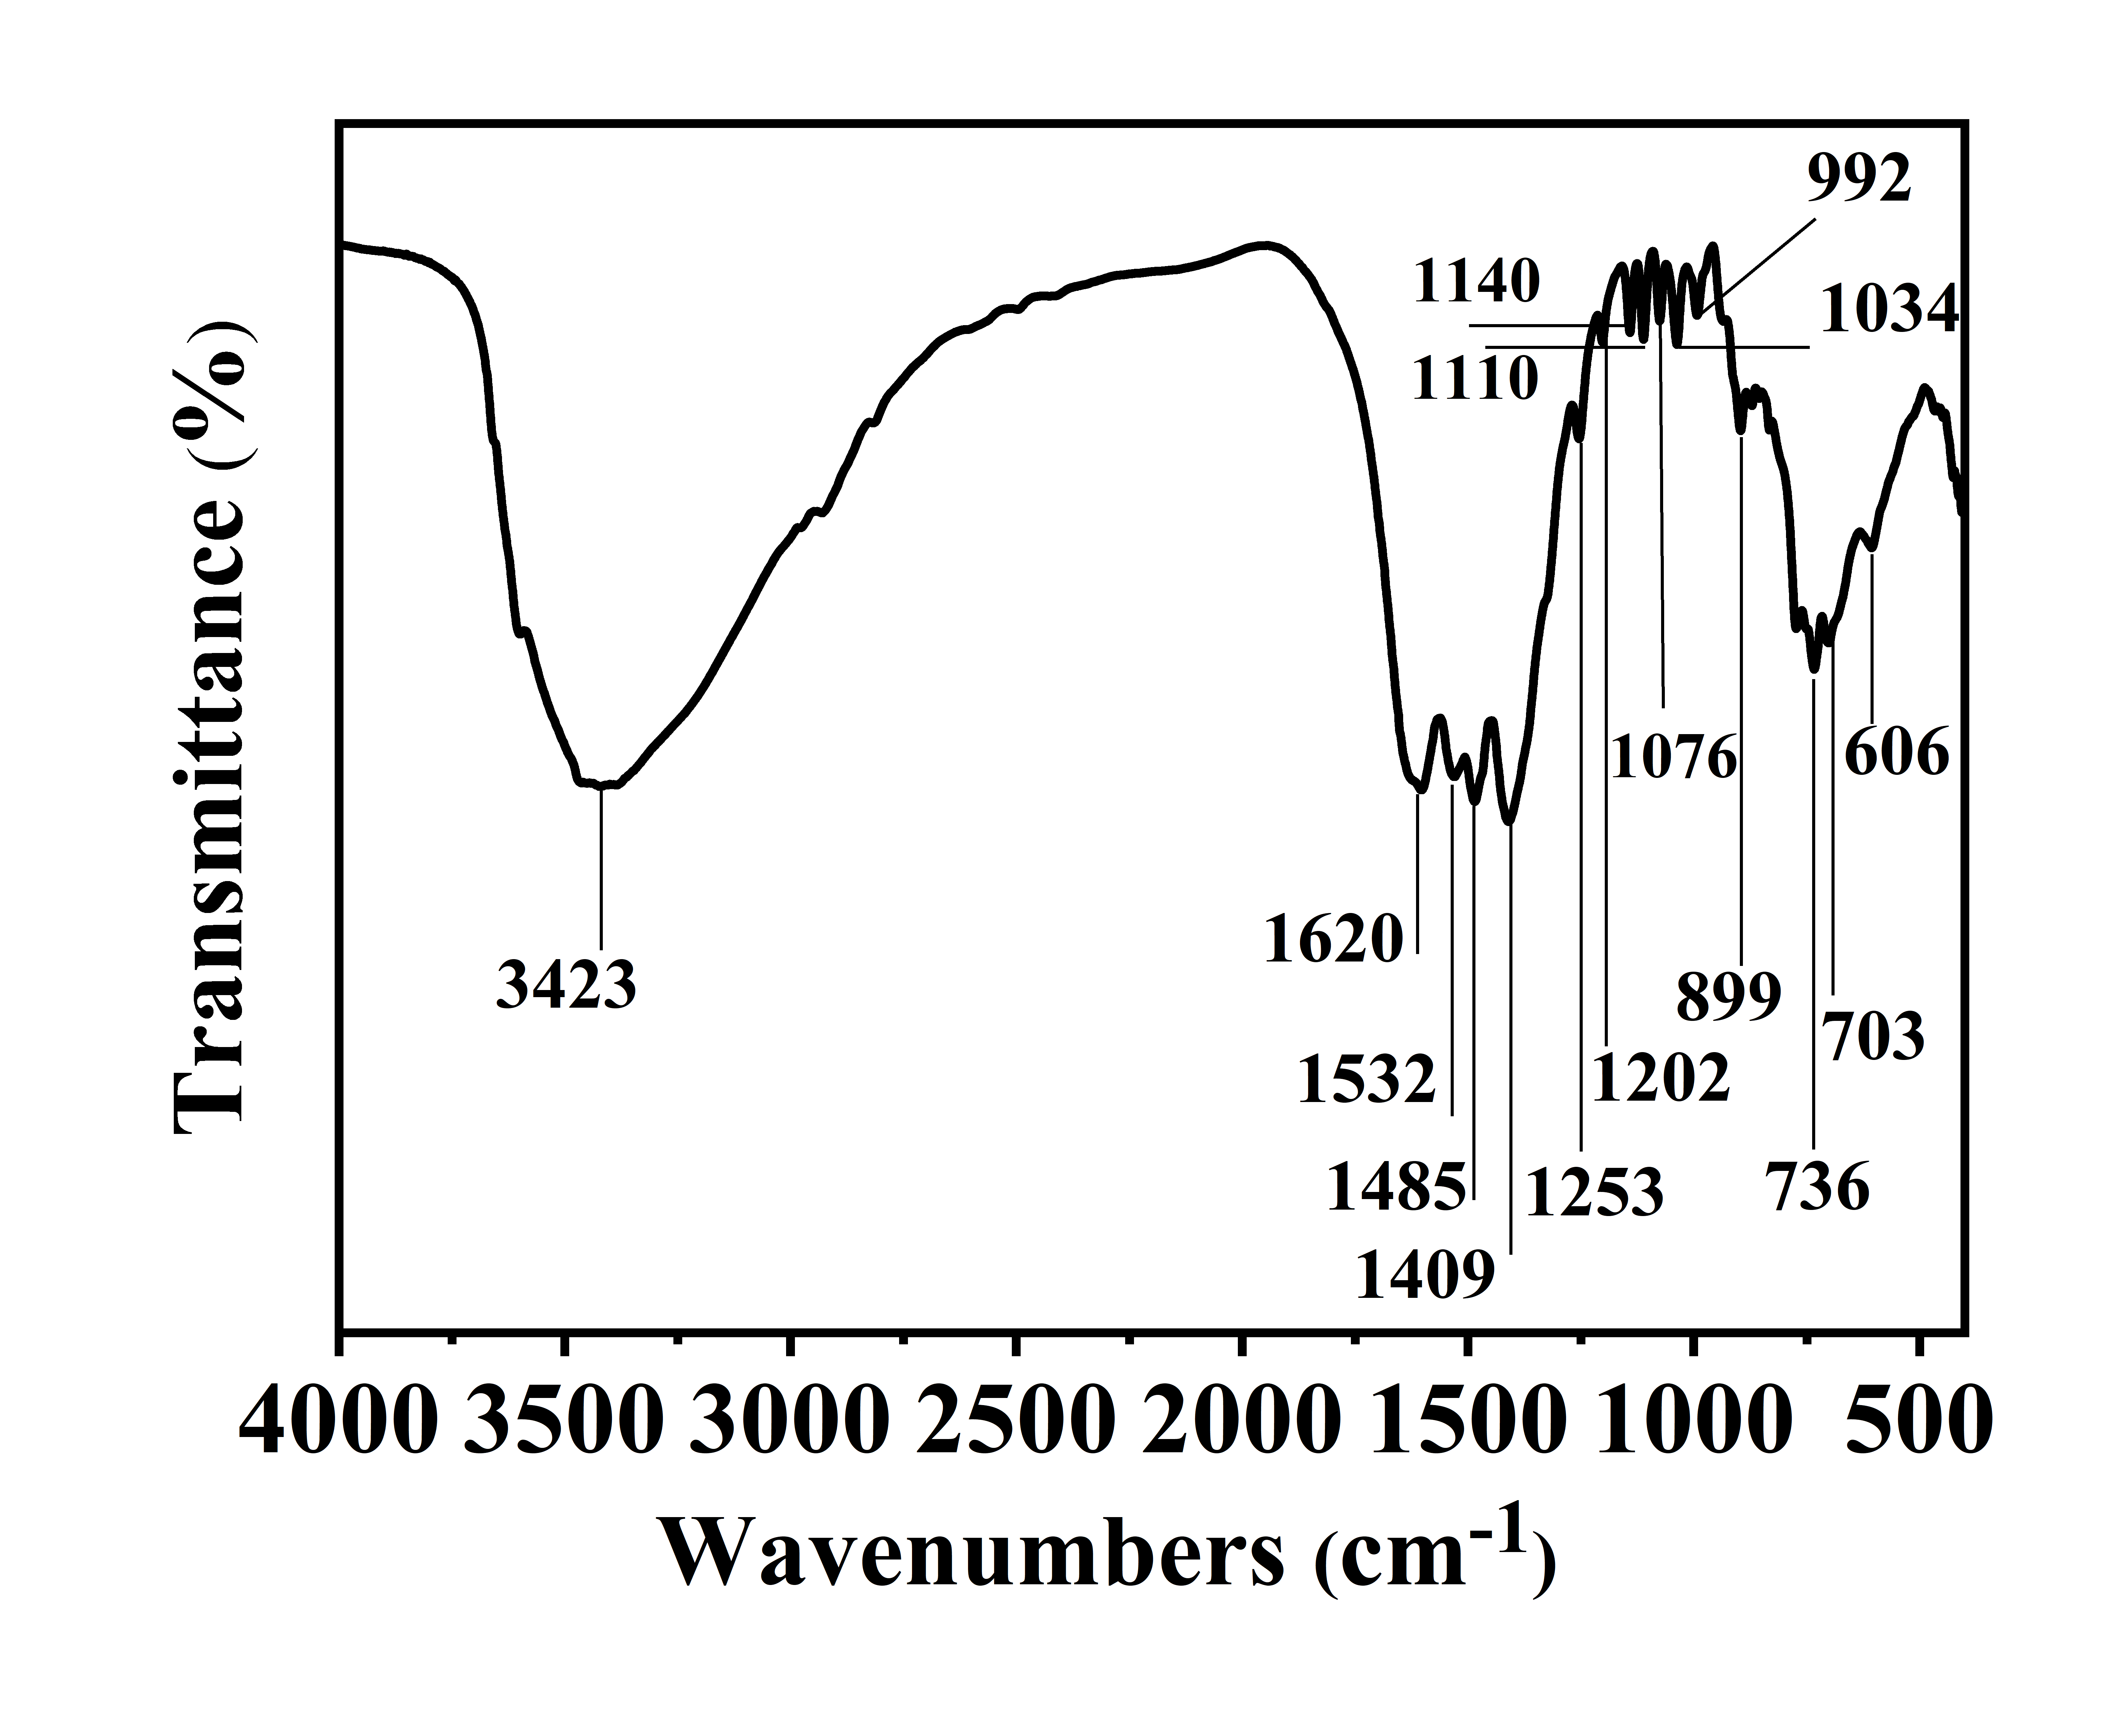


**Figure S26.** FT-IR spectra of **Cl12@Gd158Co38**.

FT-IR spectra (Figure S25 – S26) of **Cl12@Gd158Co38** and **Br12@Gd158Co38** were acquired (*v* = 400 - 4000 cm-1). Taking **Cl12@Gd158Co38** as an example, the strong and broad absorption band in the area around 3423 cm–1 can be considered as the -OH stretching vibration. The sharp peaks at 1620, 1532, and 1485 cm–1 are attributed to the -COO- antisymmetric and symmetric stretching vibration. The peaks at 1409, and 1140 cm–1 are attributed to the presence of CO32- groups. The peaks at 1110, and 1040 cm–1 are attributed to the C-O stretching vibration. Meanwhile, FT-IR spectra analysis suggested the no existence of NO32- molecules due to no typical peaks of N=O at 1385 cm–1. The phenomenon of the above characteristic peaks is accordance with those of analogous compounds documented in literature.1,2,6

##

## TGA


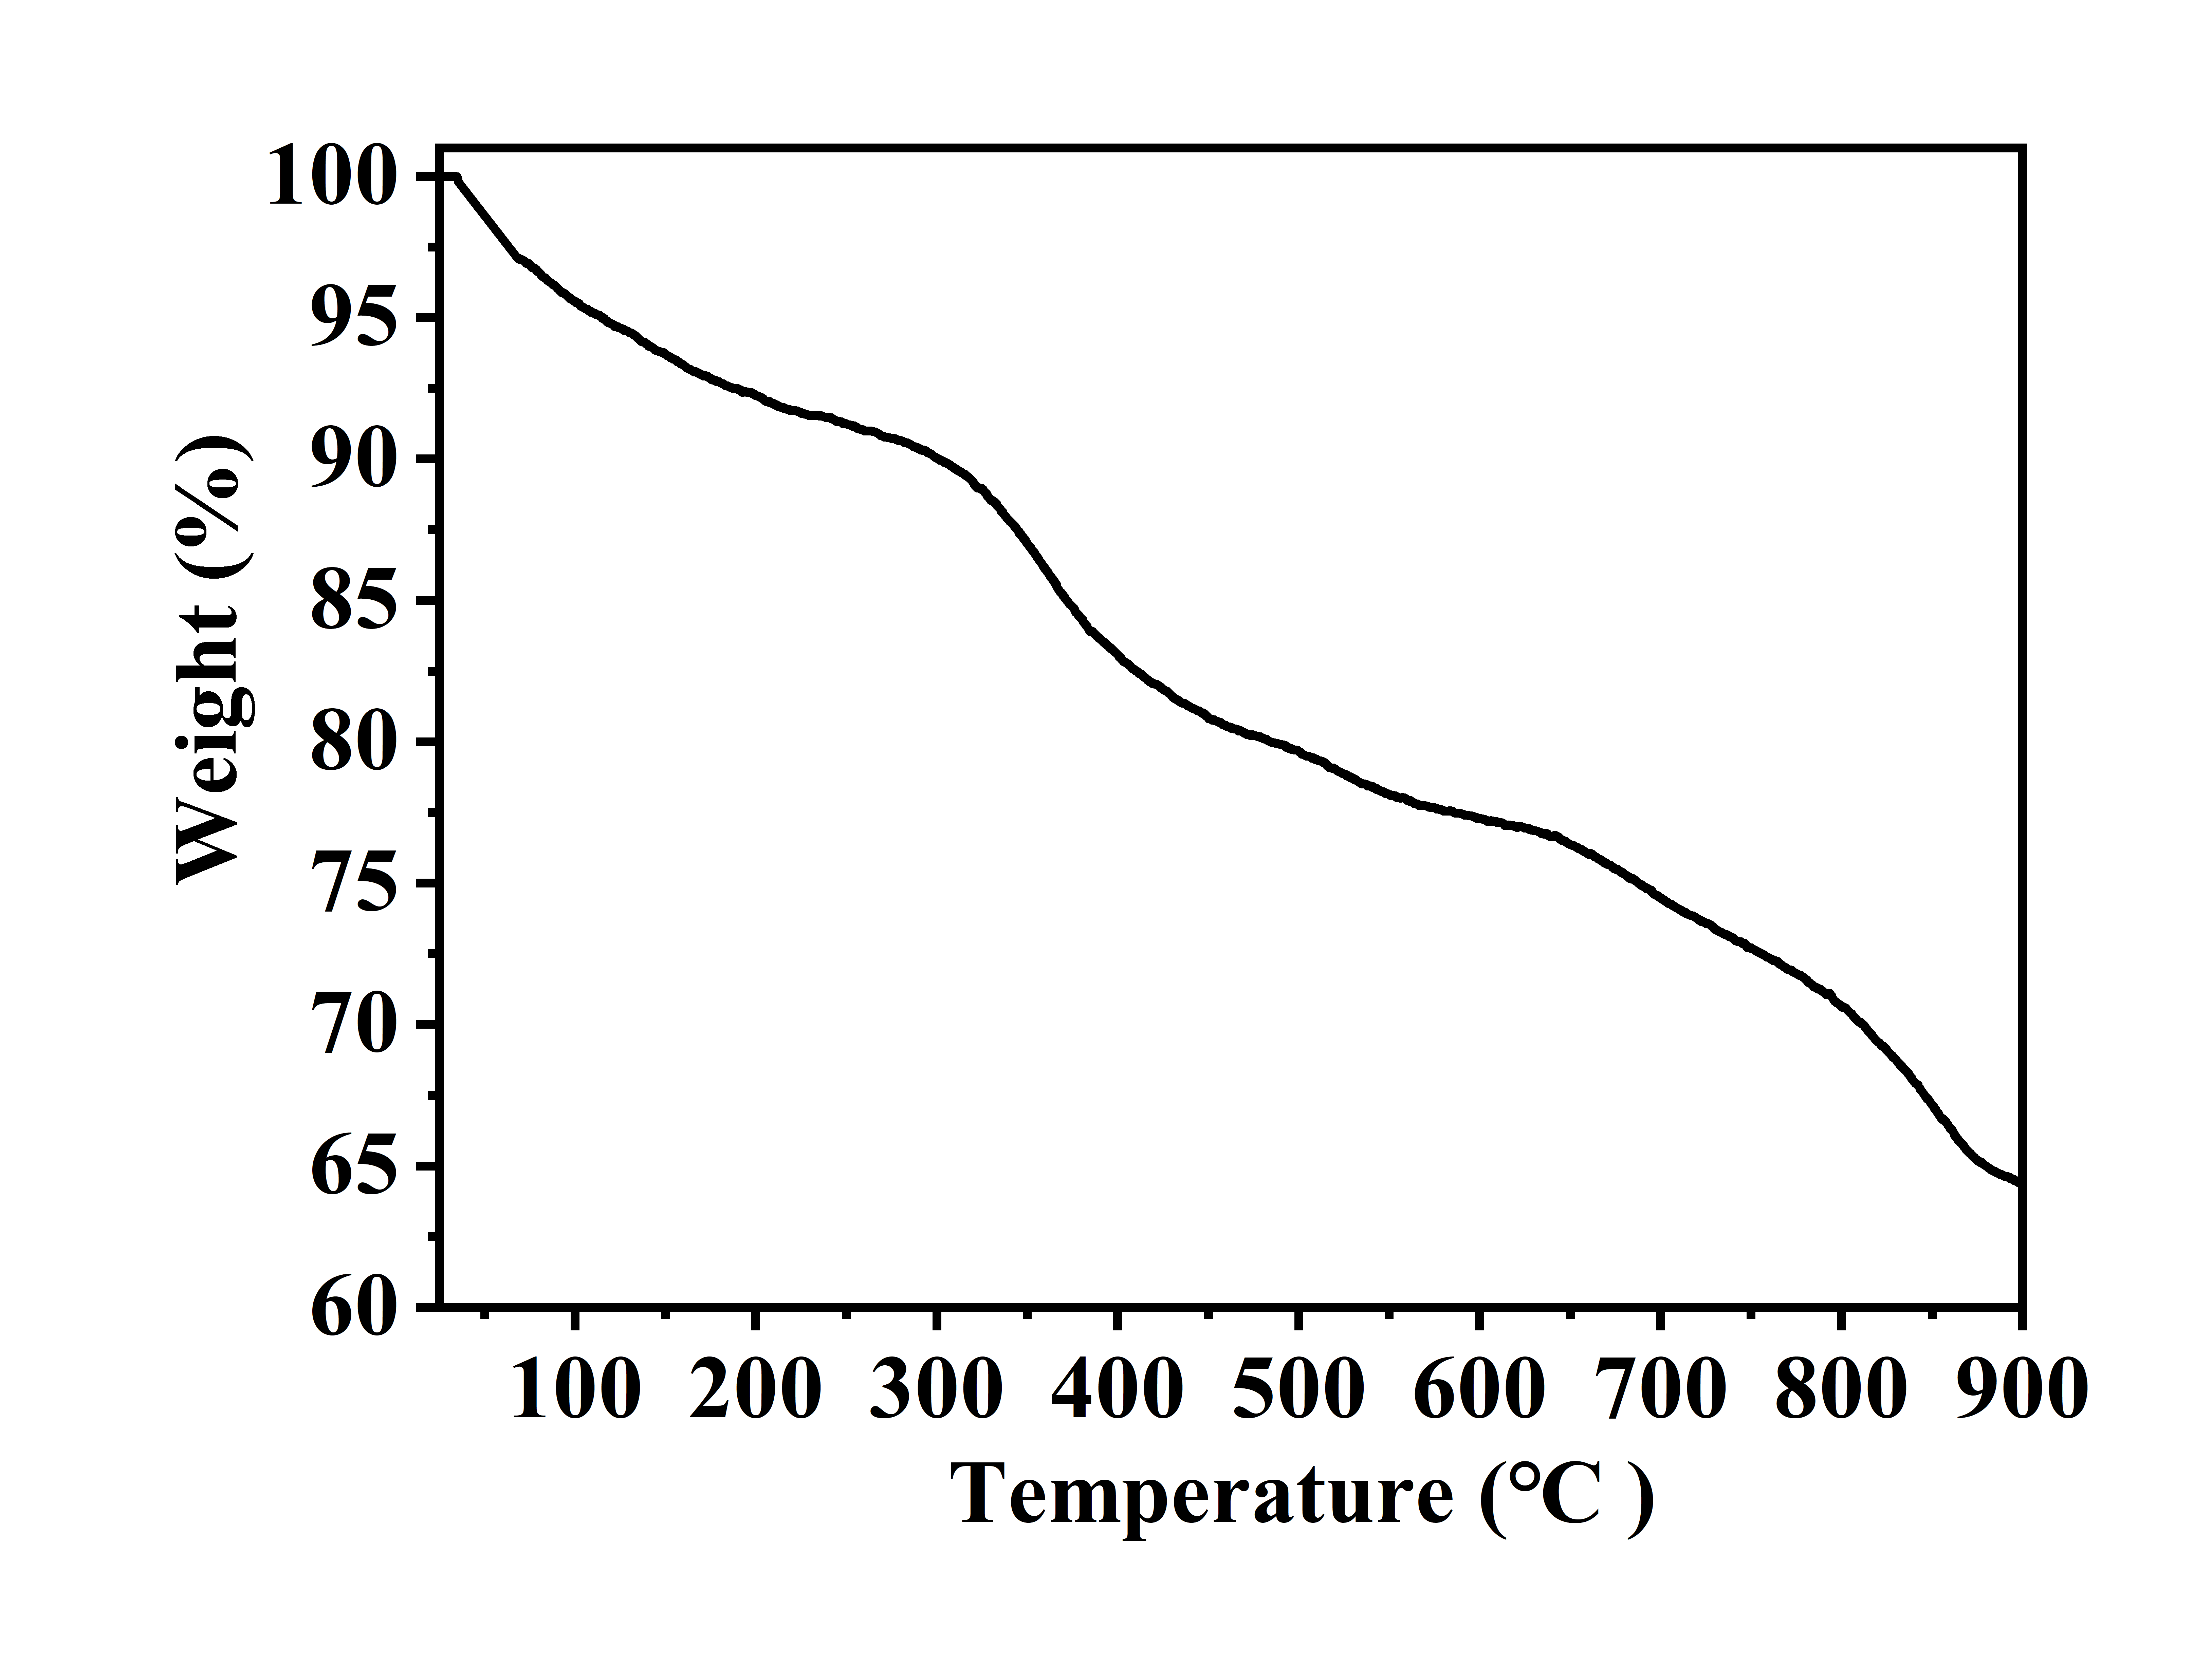


**Figure S27.** TGA curve of **Cl12@Gd158Co38**.


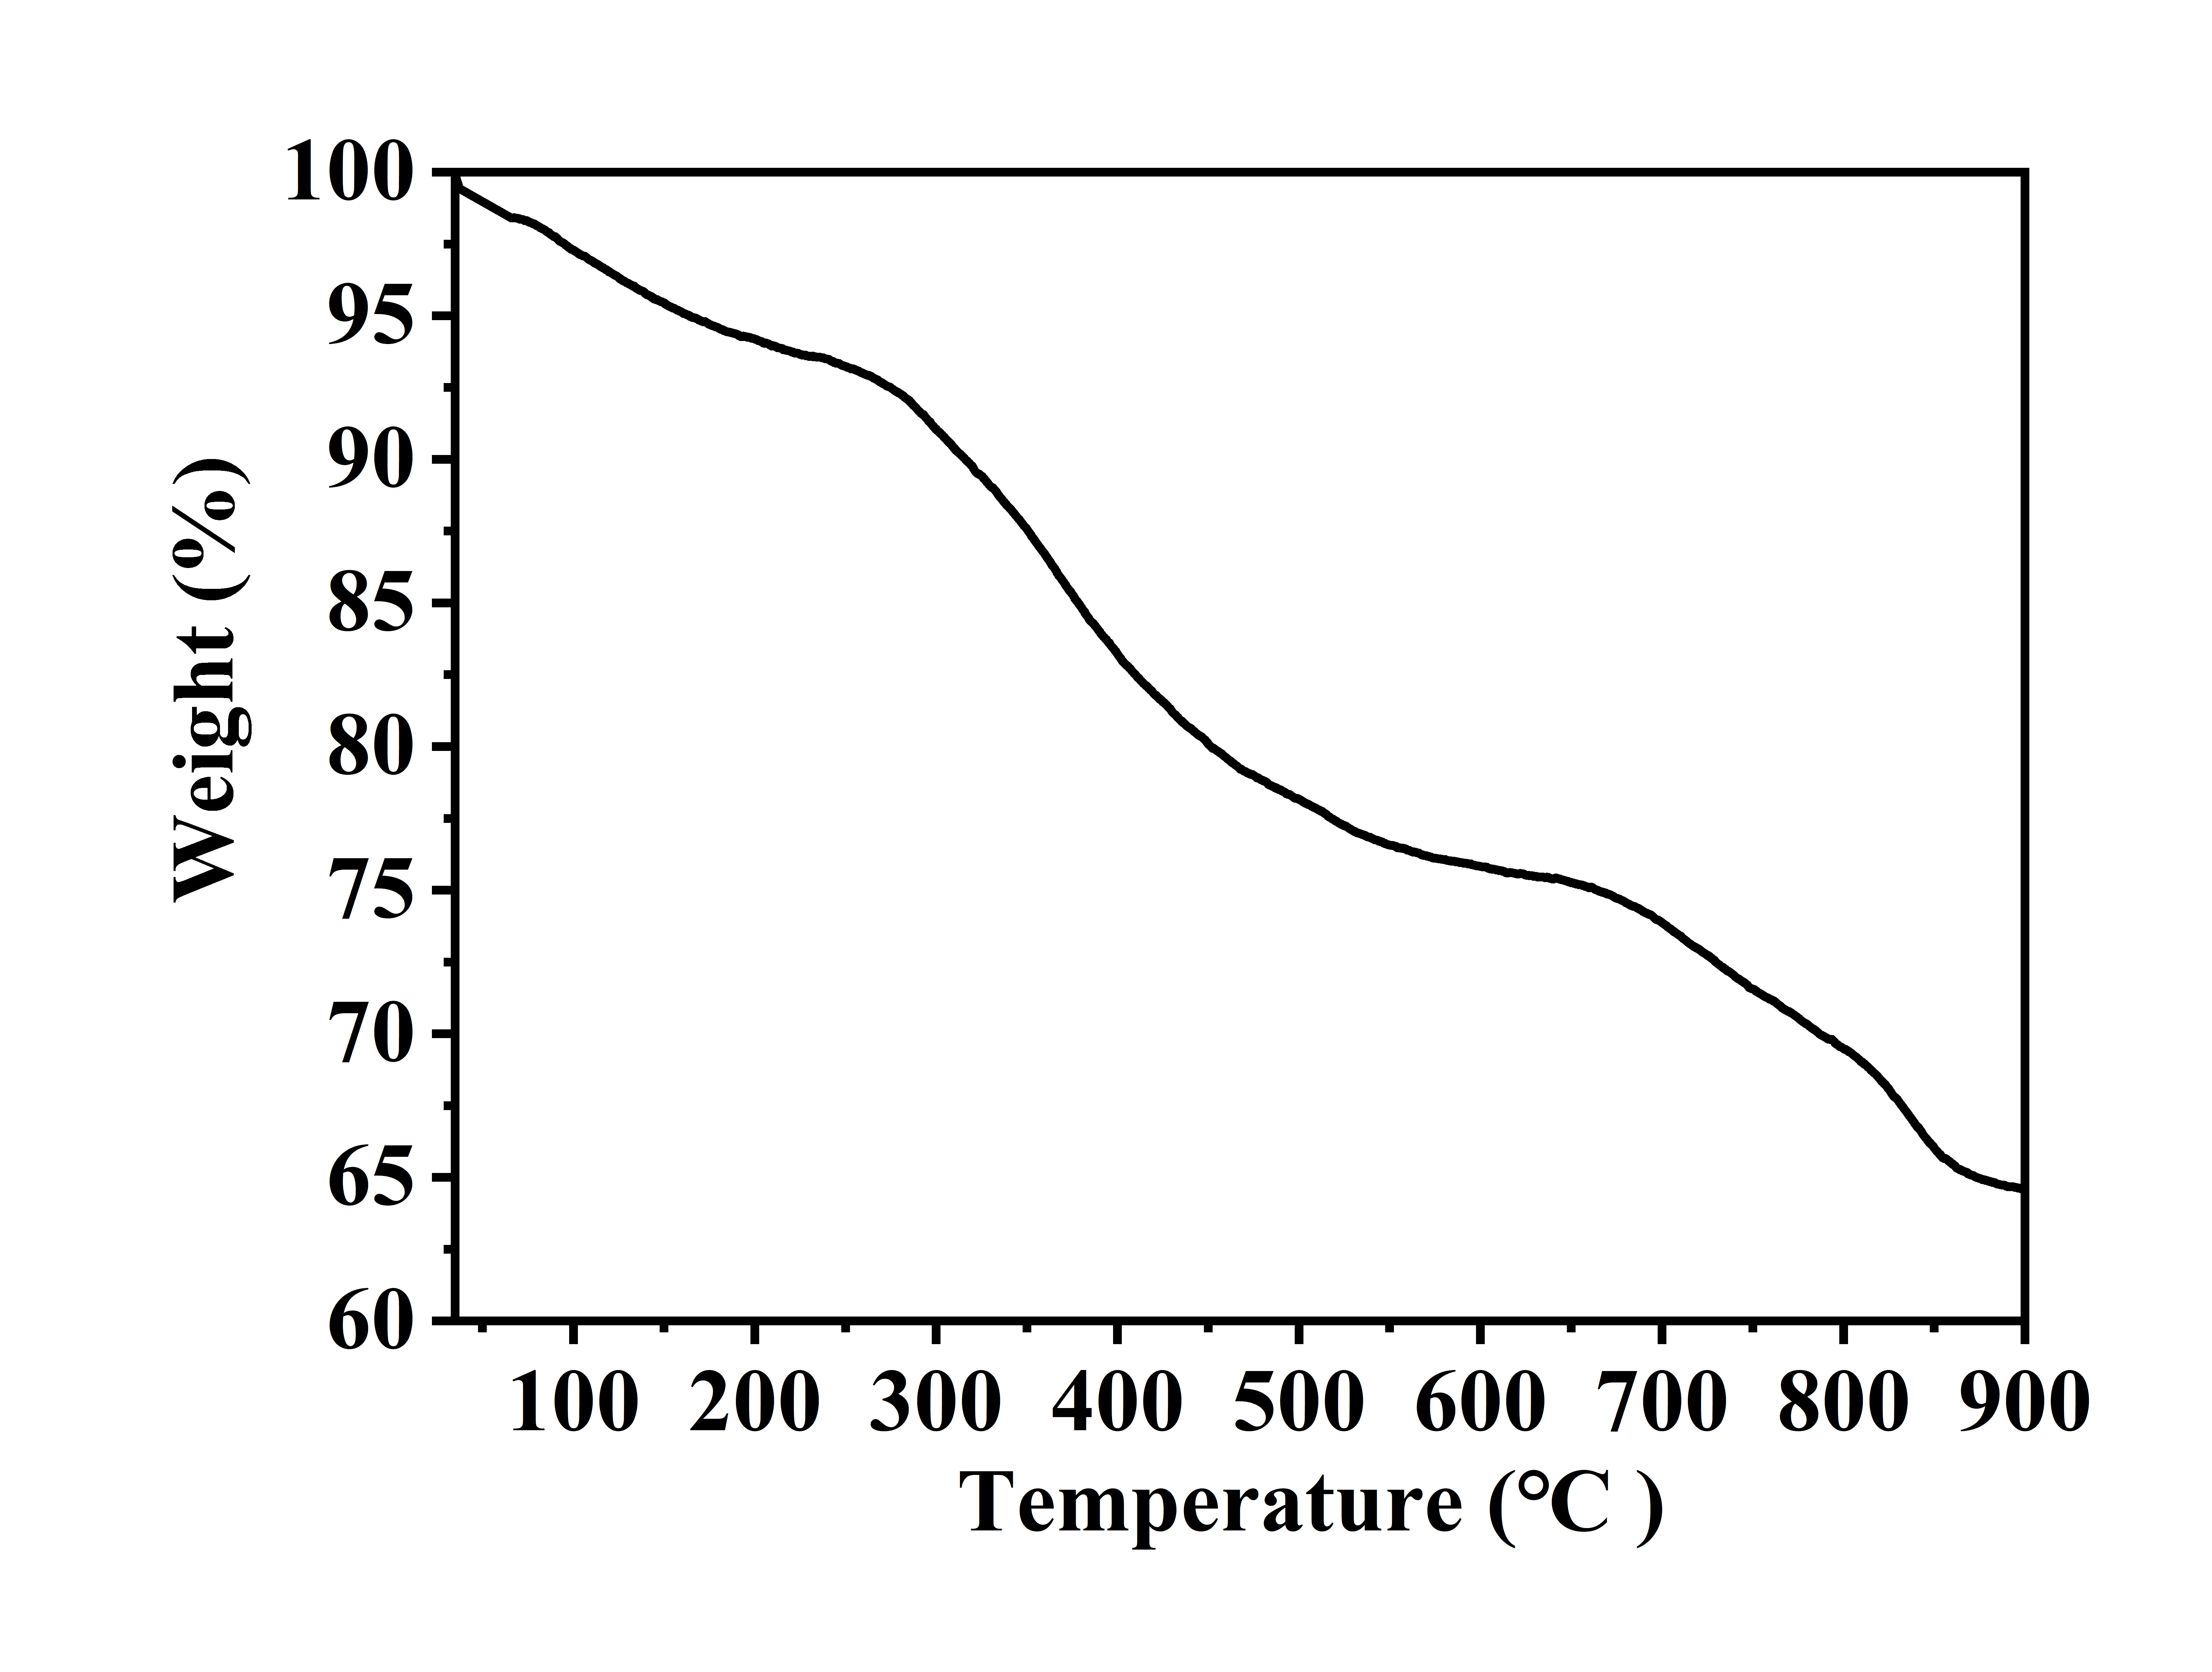


**Figure S28.** TGA curve of **Br12@Gd158Co38**.

TGA was performed (T = 25 - 900 °C) in a N2 atmosphere at a heating rate of 10 °C min–1 for **Cl12@Gd158Co38** and **Br12@Gd158Co38**. As shown in Figures S27-28, the TGA diagrams of **Cl12@Gd158Co38** and **Br12@Gd158Co38** display two weight loss phases. For **Cl12@Gd158Co38**,an initial weight loss between room temperature and 220 °C (8.29 %; calcd: 8.27 %), resulting from the removal of the 144 free H2O and 84 coordination H2O. The second weight loss between 220 °C and 900 °C is corresponding with the thermal decomposition of MIDA2- and CO32- ligands.

TGA analyses of **Br12@Gd158Co38** yielded similar results (Figure S28). The first stage of weight loss occurred between room temperature and 220 °C (6.24 %; calcd: 6.26 %), resulting from the removal of the 94 free H2O and 78 coordination H2O. The second weight loss between 220 °C and 900 °C is corresponding with the thermal decomposition of MIDA2- and CO32- ligands.

##

## XRF

**Table S2.** The XRF data of **Cl12@Gd158Co38**.

| Component | mass% |
| --- | --- |
| Cl | 2.512 |

**Table S3.** The XRF data of **Br12@Gd158Co38**.

| Component | mass% |
| --- | --- |
| Cl | 0.907 |
| Br | 3.033 |

## EDS

**Table S4.** The Cl component of **Cl12@Gd158Co38** recorded from the EDS quantitative analyses.

| component | Percentage by weight / % |
| --- | --- |
| Cl | 2.590 |


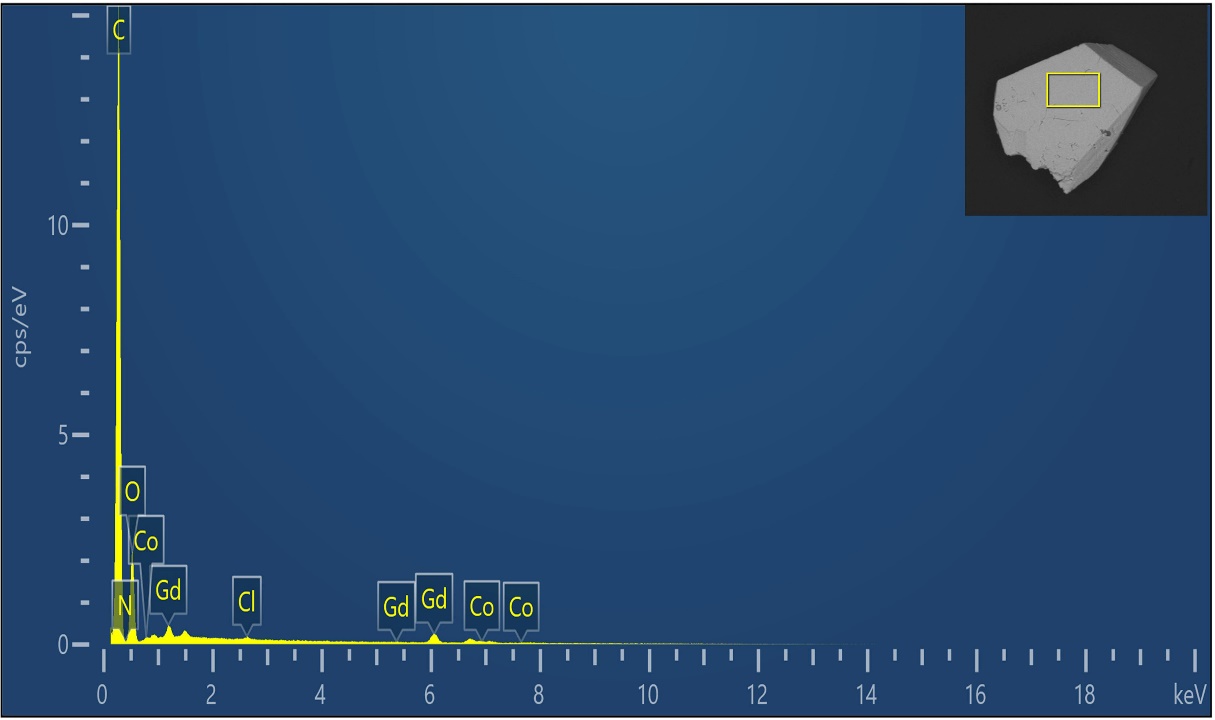


**Figure S29.** The EDS measurement of **Cl12@Gd158Co38**.


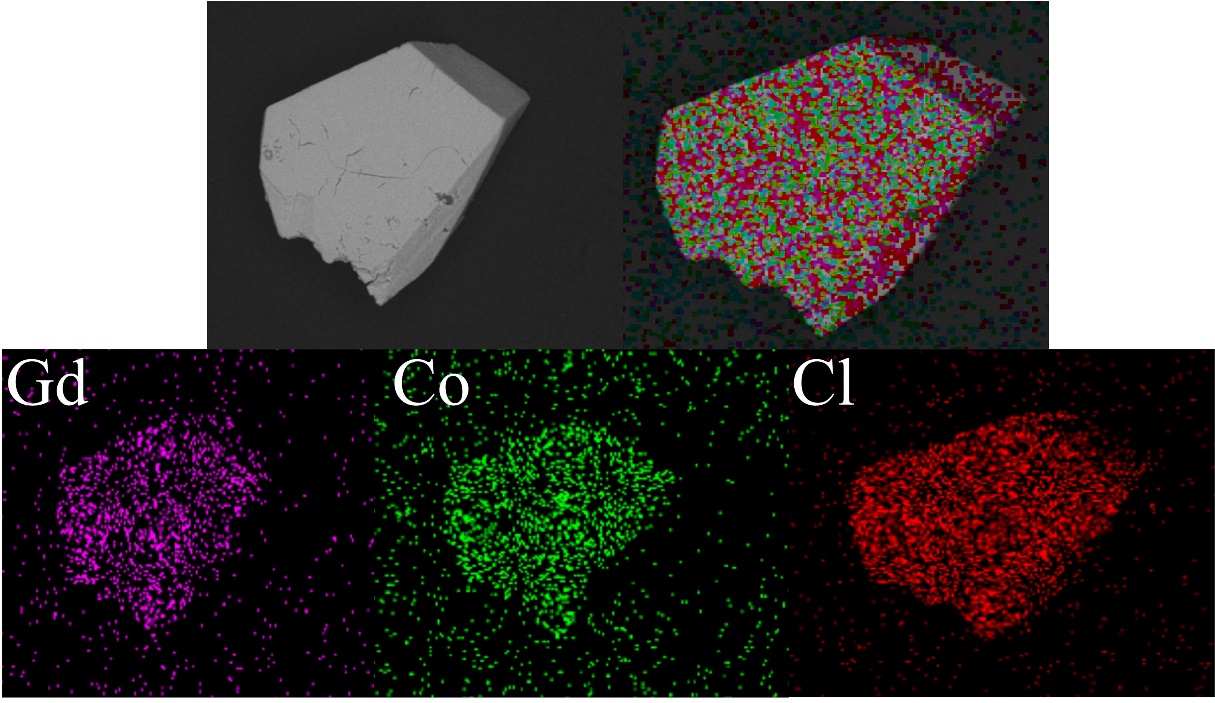


**Figure S30.** The SEM-EDS mapping of compound **Cl12@Gd158Co38**.

**Table S5.** The Cl, Br components of **Br12@Gd158Co38** recorded from the EDS quantitative analyses.

| component | Percentage by weight / % |
| --- | --- |
| Cl | 0.91 |
| Br | 3.13 |


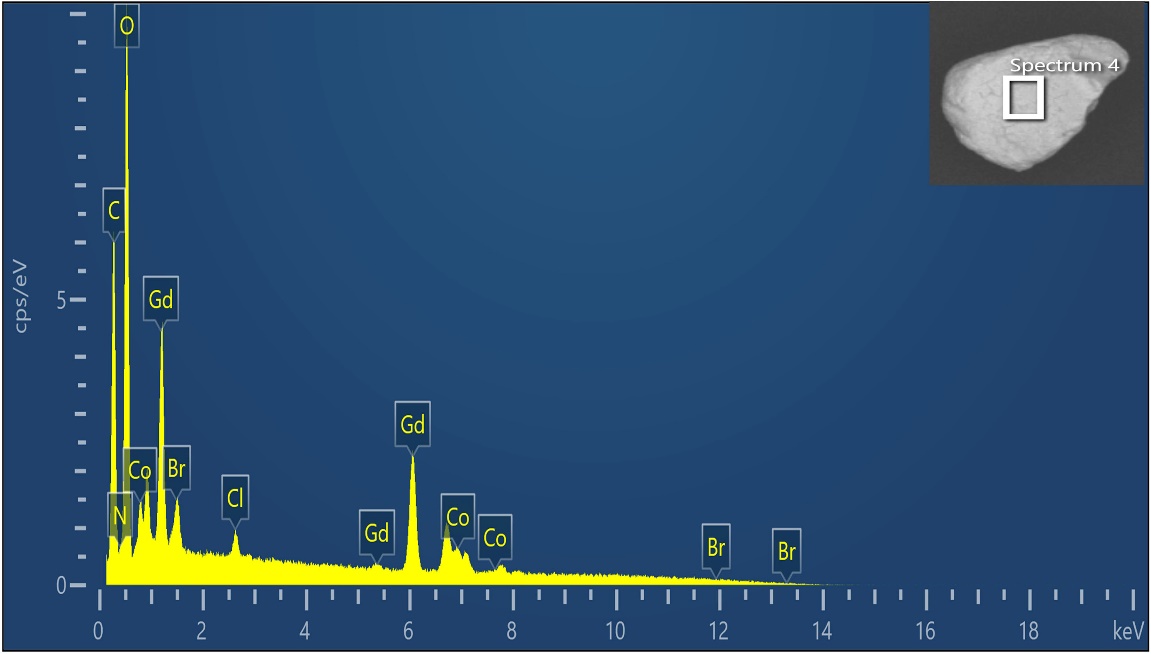


**Figure S31.** The EDS measurement of **Br12@Gd158Co38**.


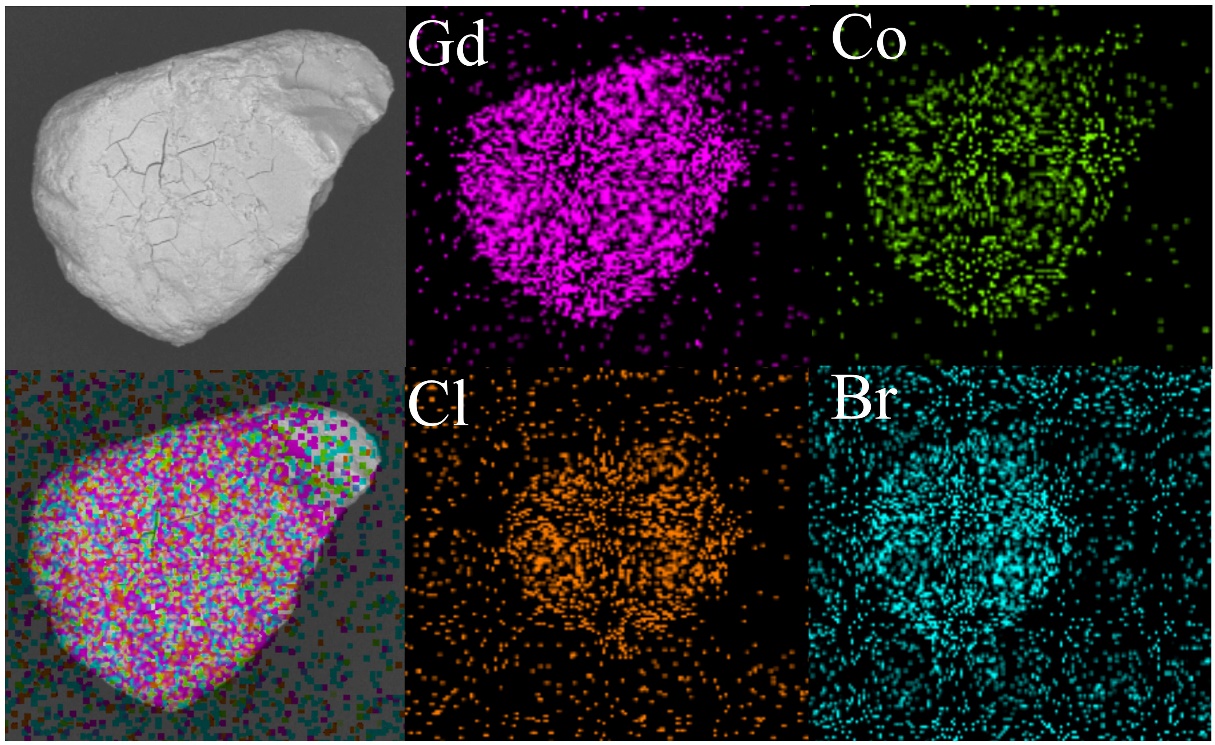


**Figure S32.** The SEM-EDS mapping of compound **Br12@Gd158Co38**.

## XPS


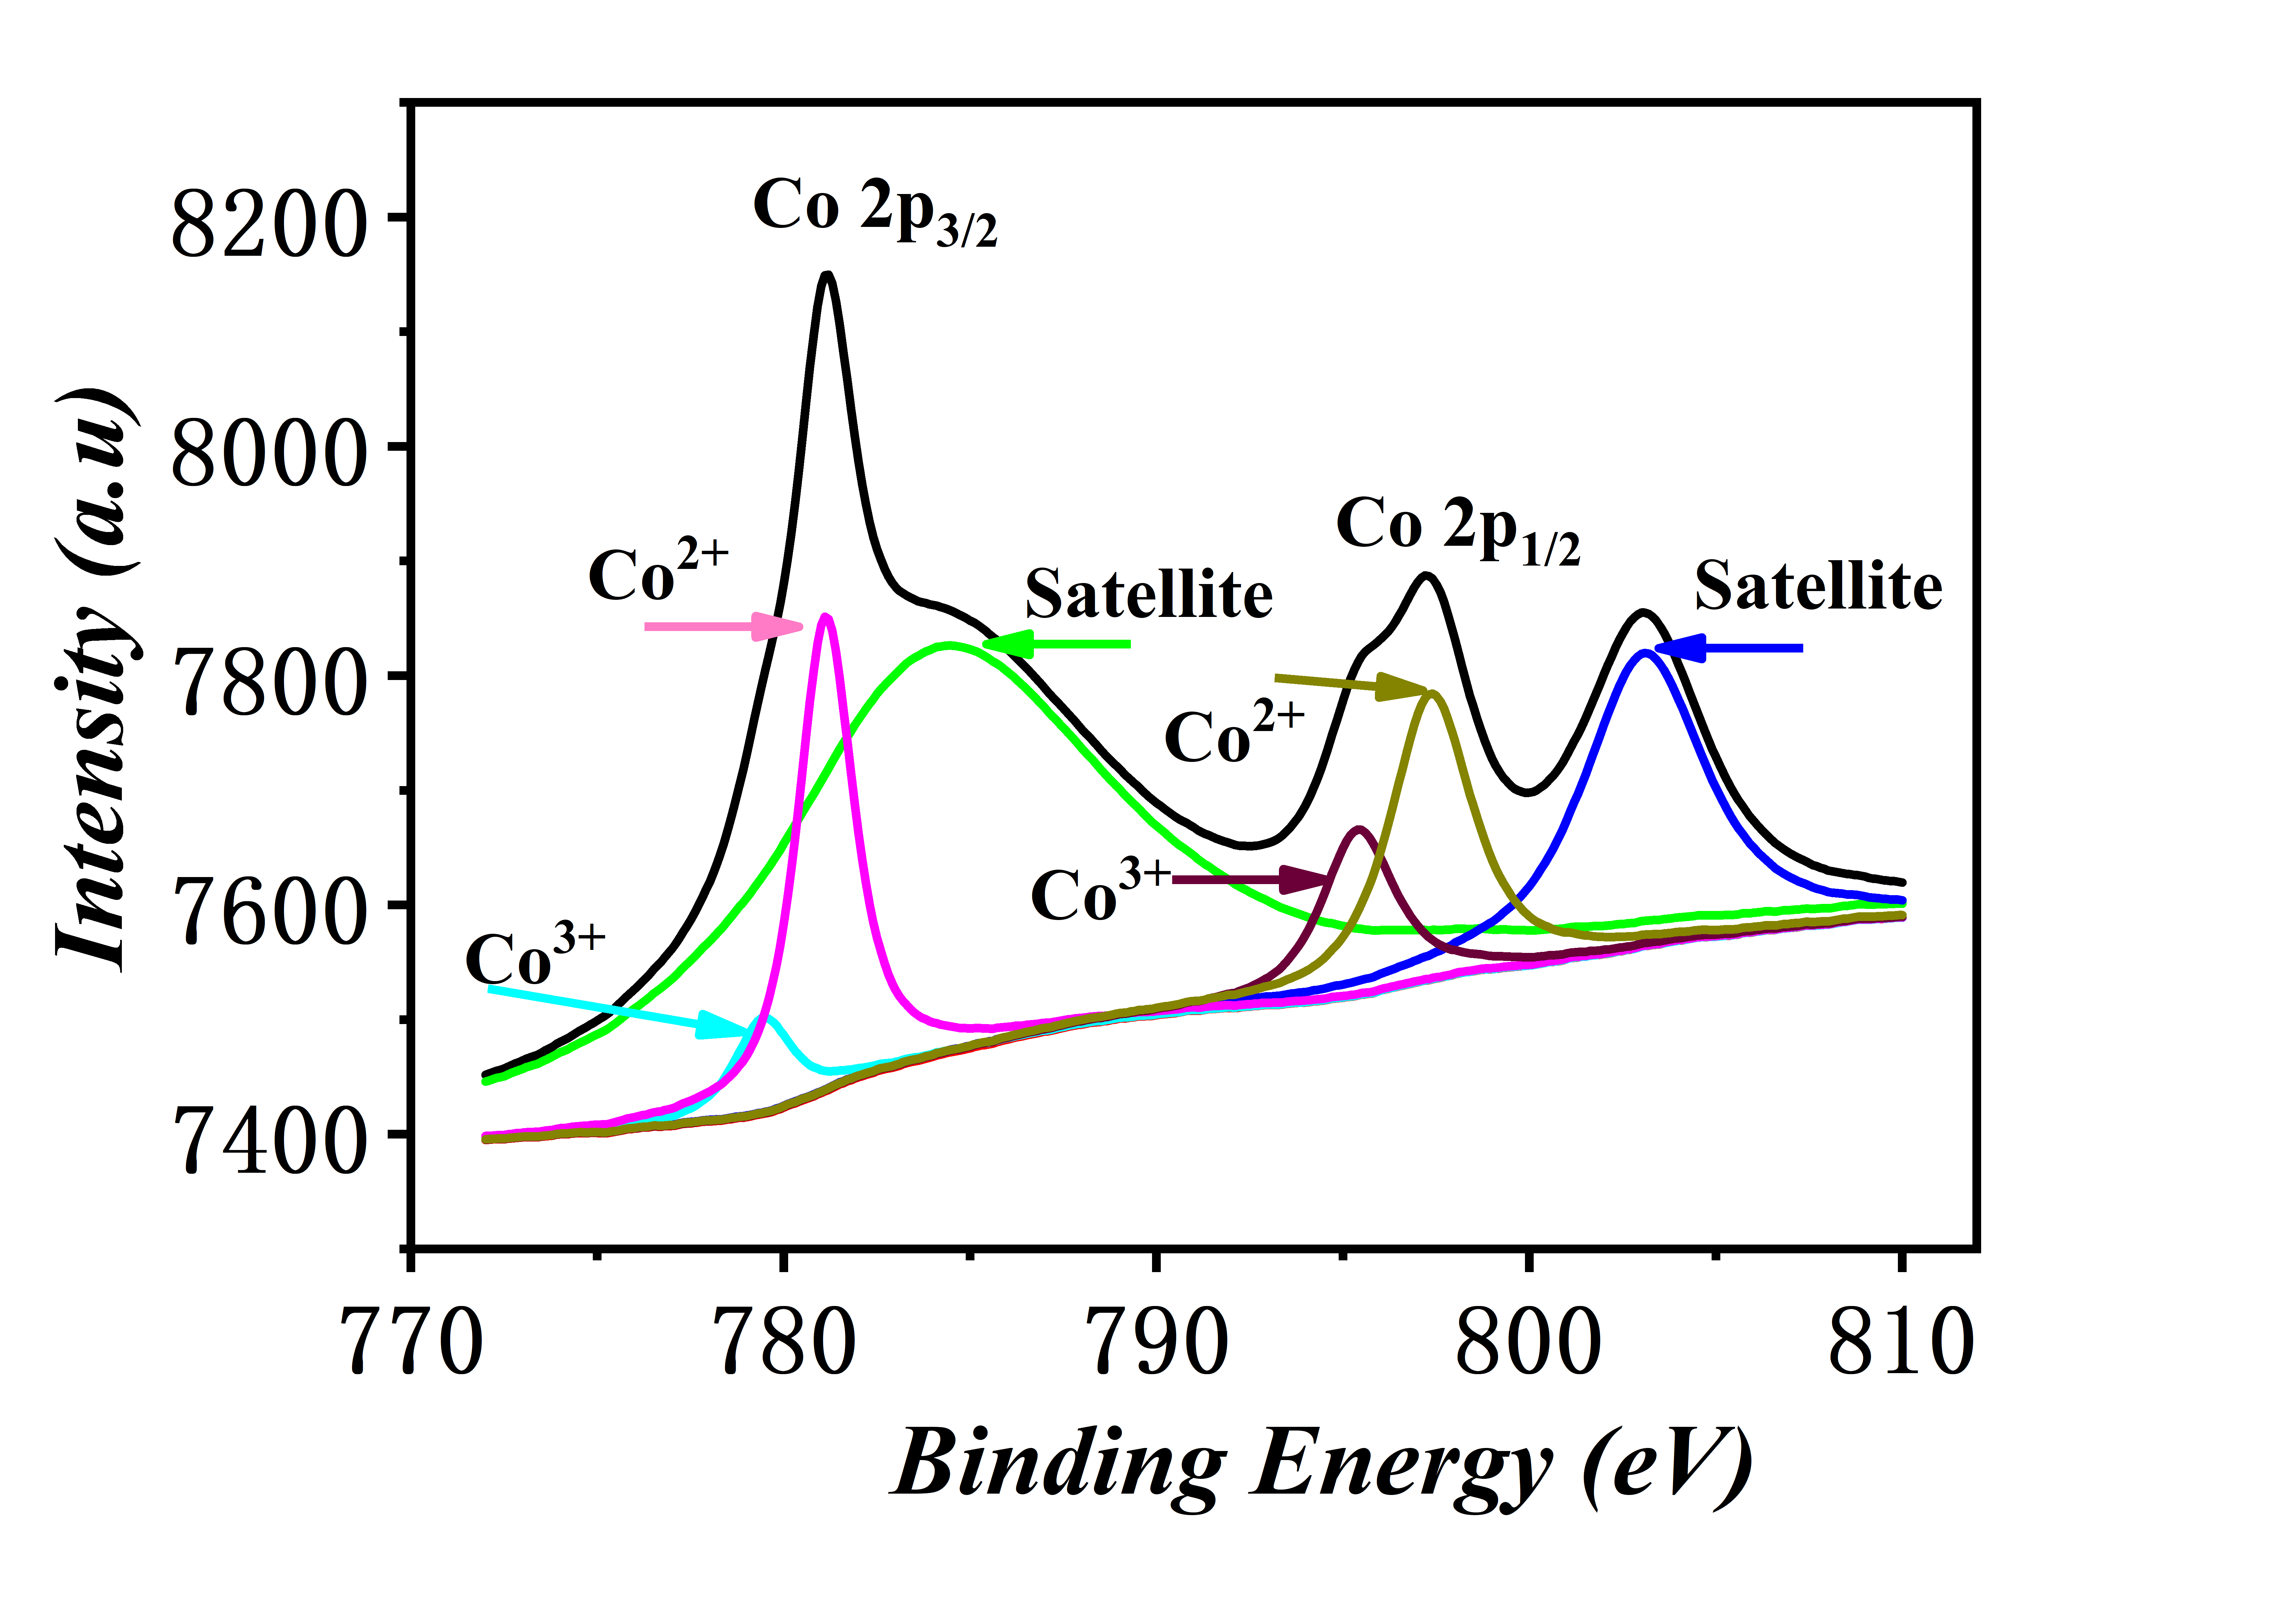


**Figure S33.** High resolution XPS spectra of Co 2p (d) of the as-synthesized **Cl12@Gd158CO38**.

In the high resolution of Co 2p XPS spectrum (Figure S33), there are three fitting peaks at 780.05 eV (Co3+), 781.28 eV (Co2+), 783.81 eV (satellite) for Co 2p3/2, and three fitting peaks at 796.09 eV (Co3+), 797.57 eV (Co2+), and 803.35 eV (satellite) for Co 2p1/2, respectively.10-11 The ratio of Co2+ and Co3+ can be determined to be about 2.8 by calculating the peak areas, which is consistent with the result obtained from the charge balance.

# Section 5. Thermal Stability


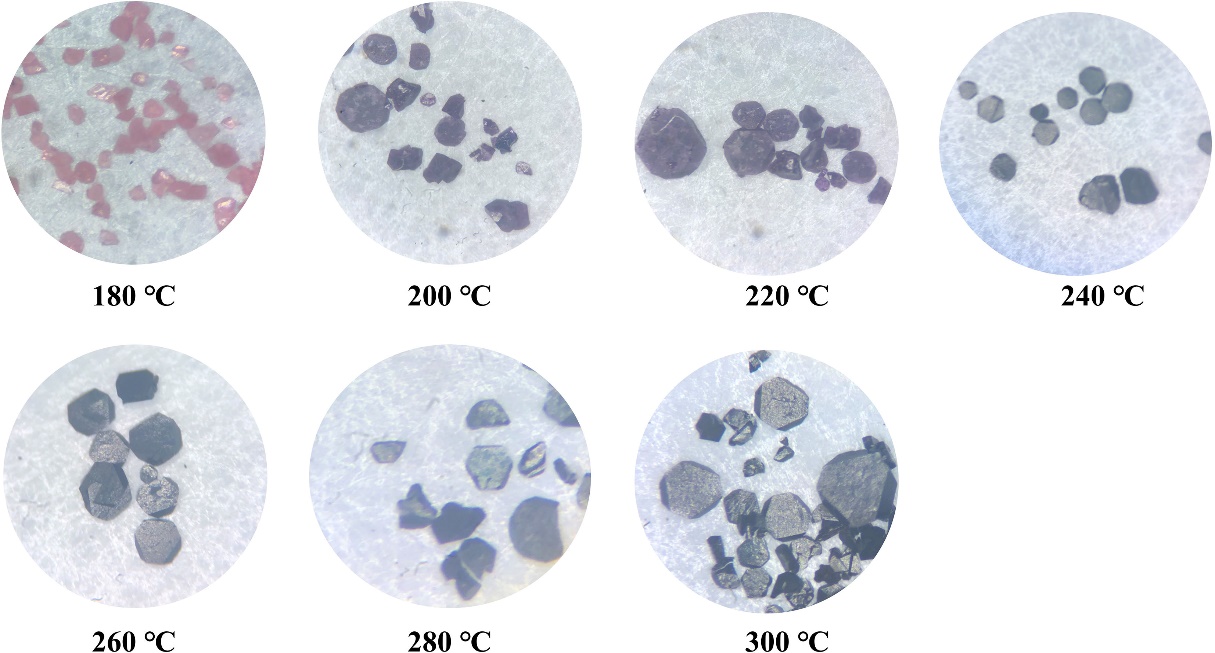


**Figure S34.** Coloration changes of **Cl12@Gd158Co38** at different temperatures.


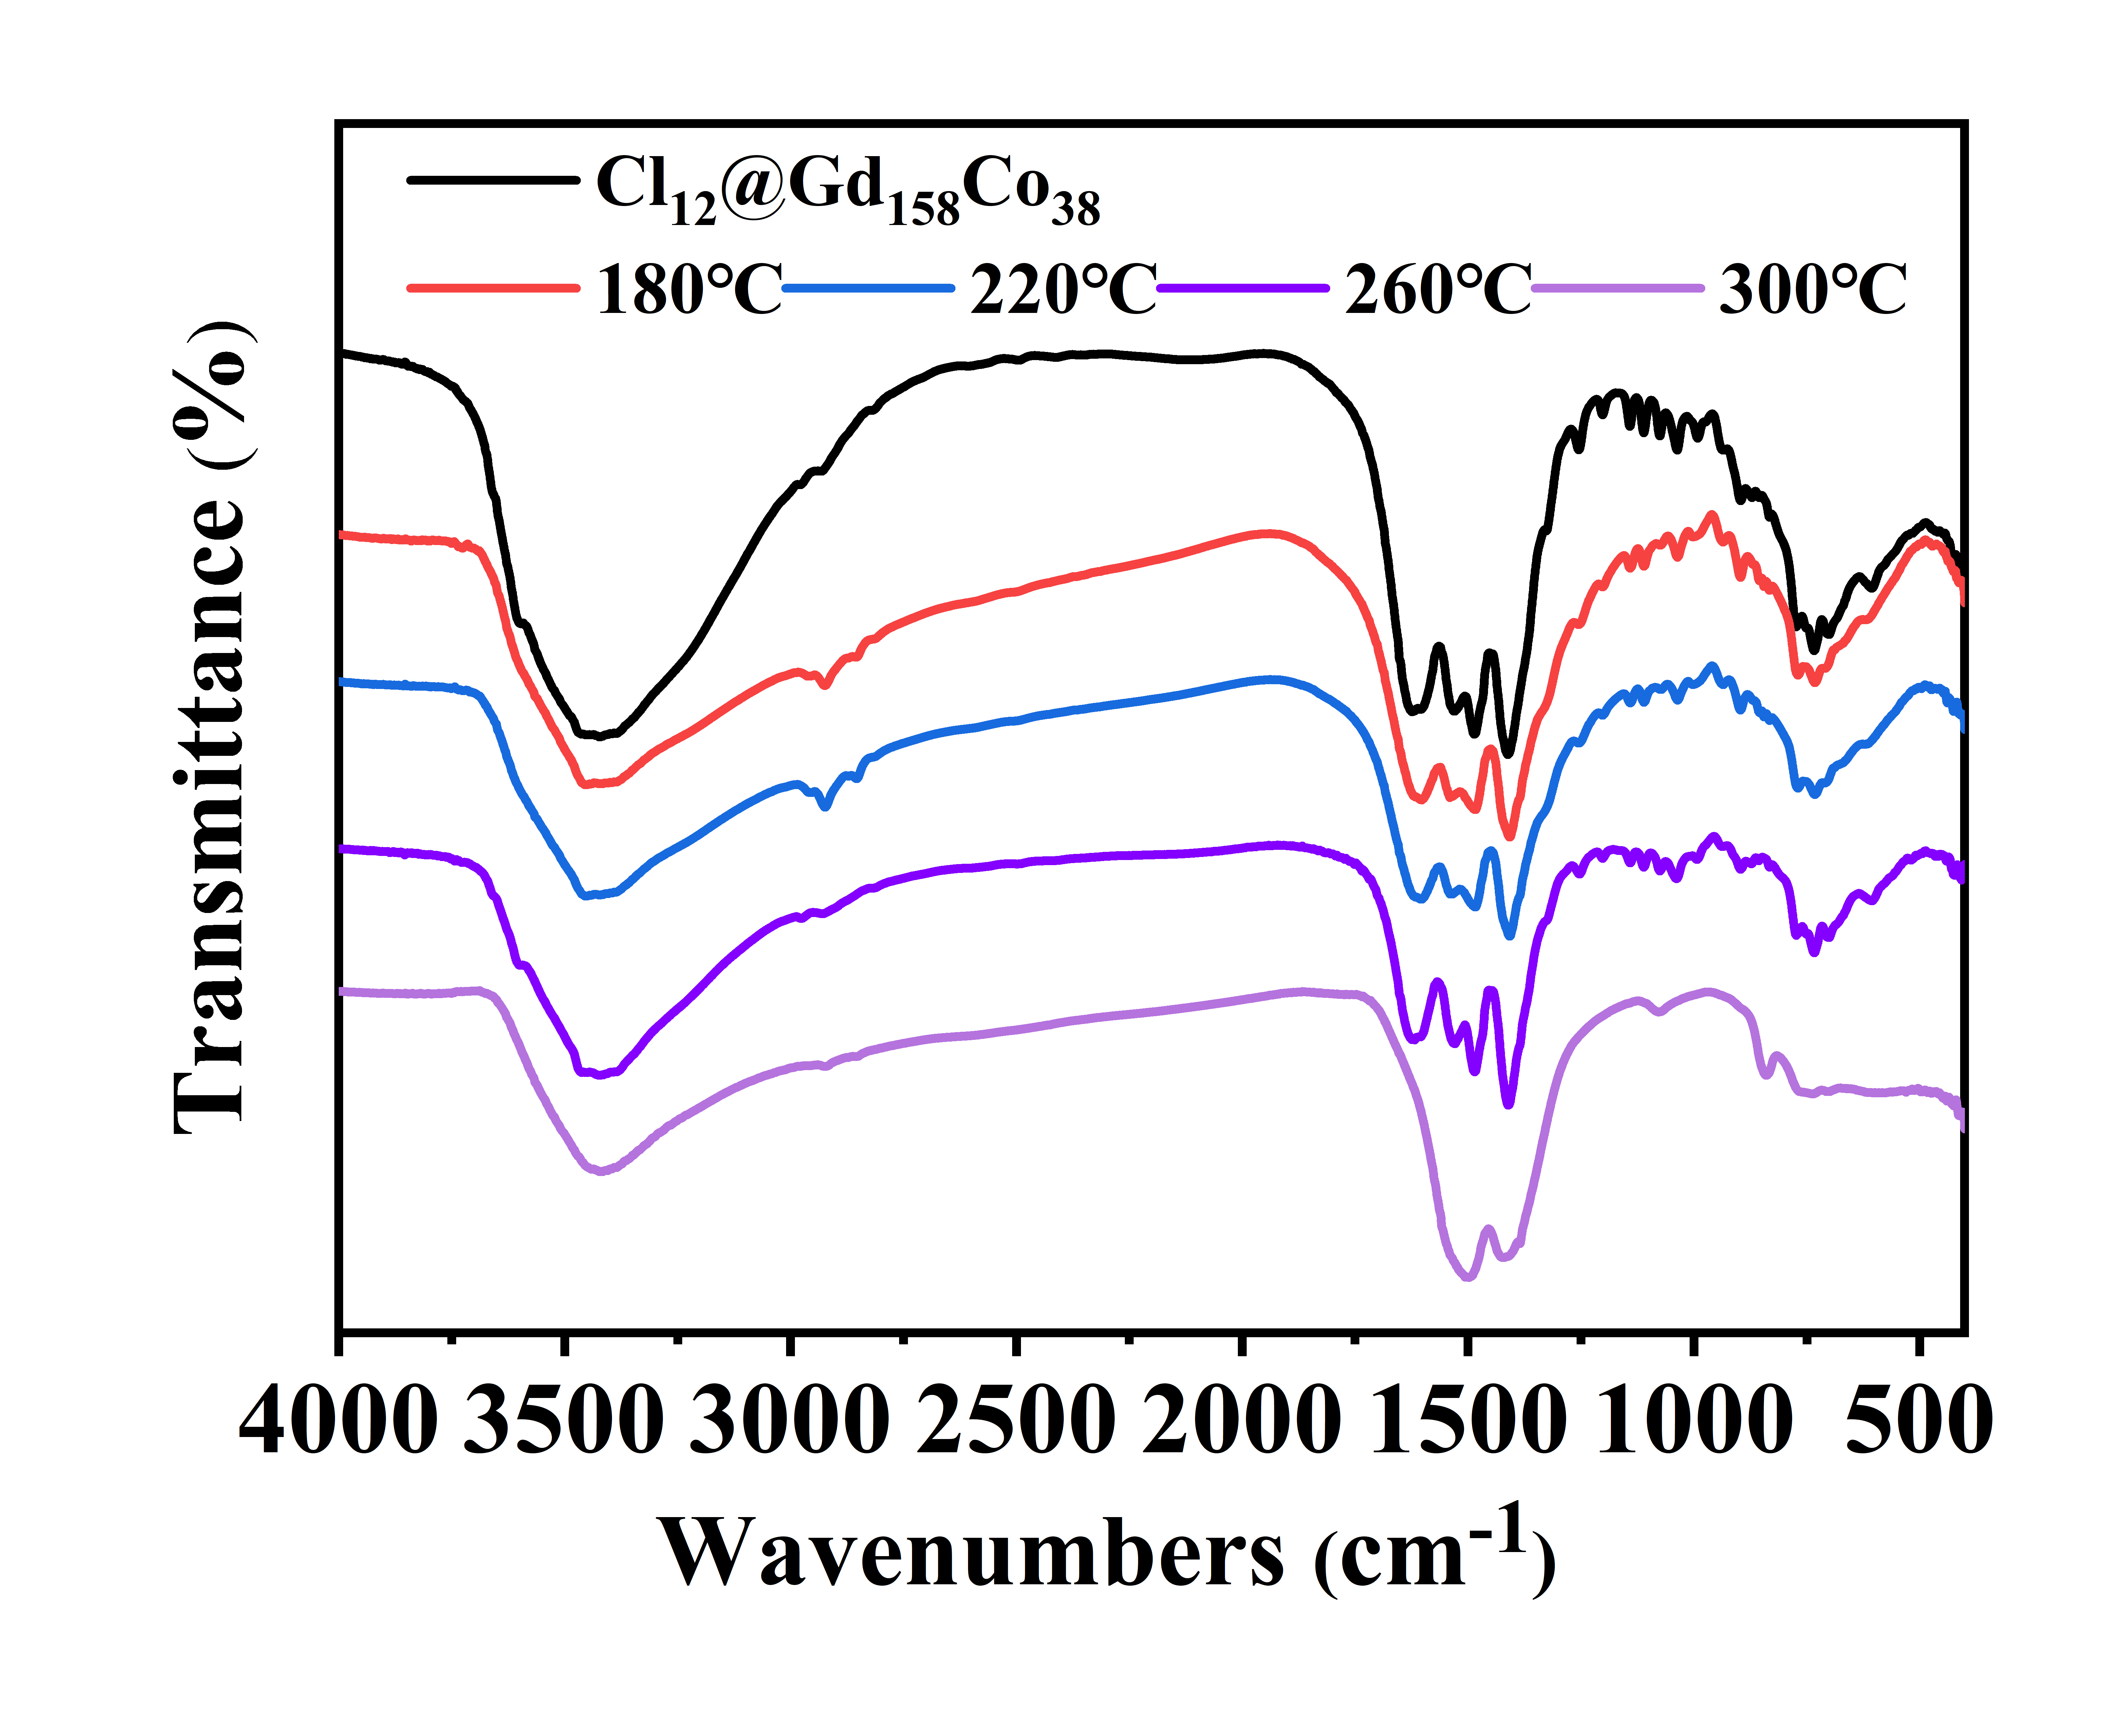


**Figure S35.** Variable-temperature FT-IR spectra for **Cl12@Gd158Co38**.
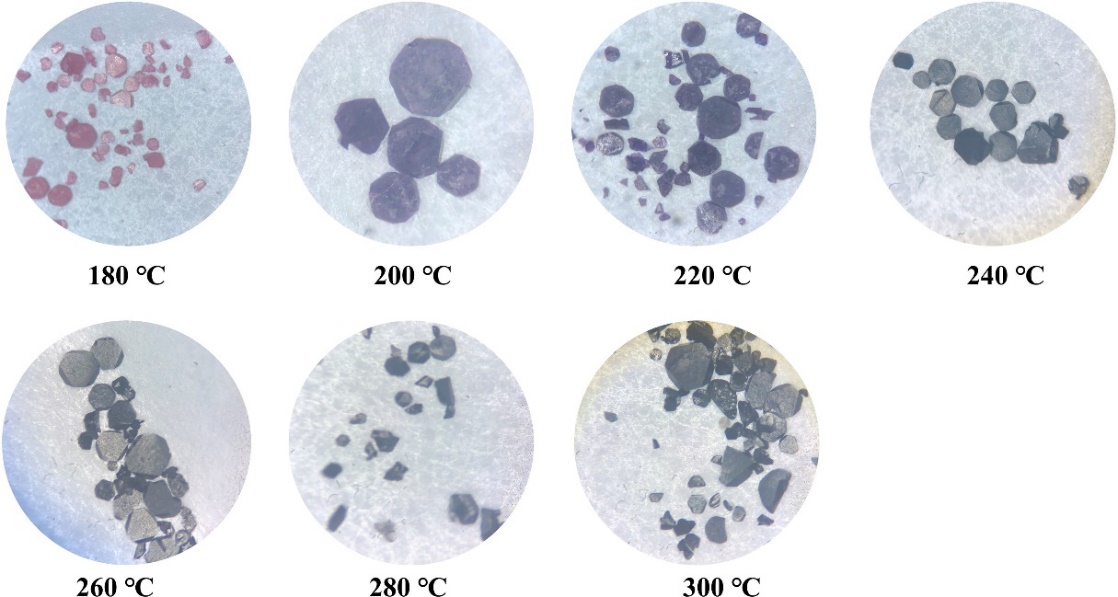


**Figure S36.** Coloration changes of **Br12@Gd158Co38** at different temperatures.


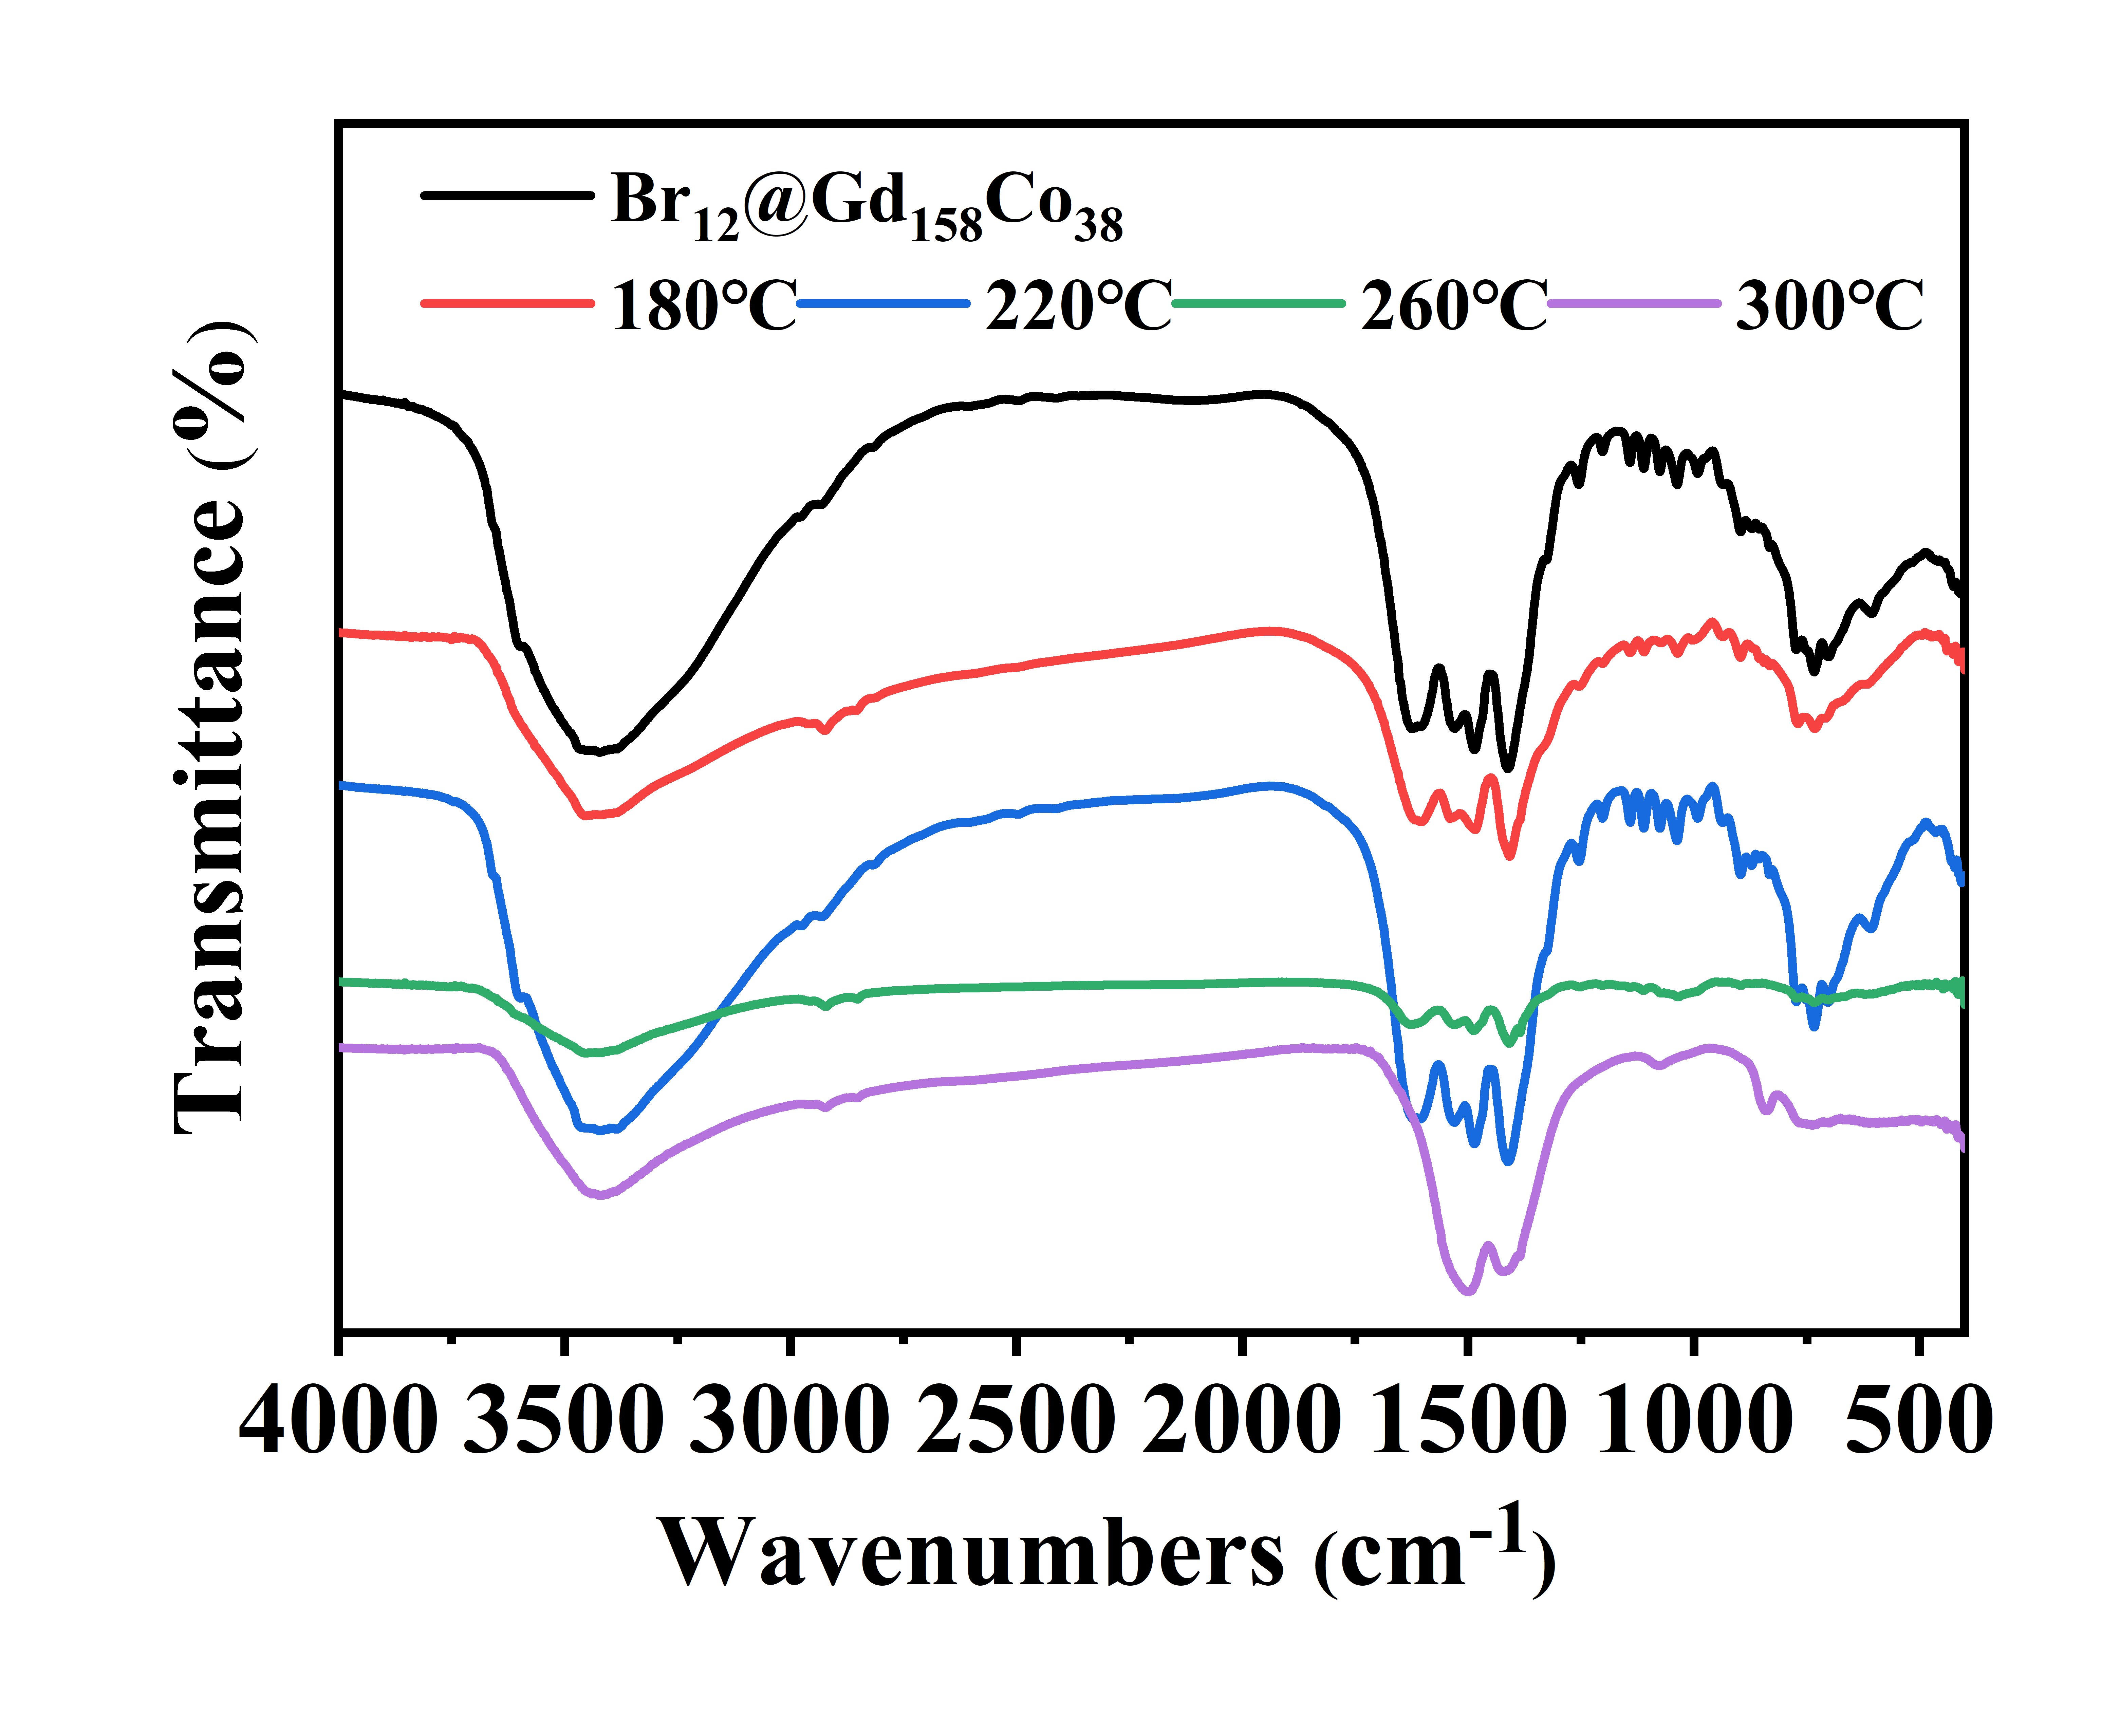


**Figure S37.** (a) Variable-temperature FT-IR spectra for **Br12@Gd158Co38**.

In order to further understand the thermal stability, the single crystals **Cl12@Gd158Co38** and **Br12@Gd158Co38** were heated from 180 - 300 ℃. Here **Cl12@Gd158Co38** as the example to be discussed, owing to the similar result. As temperature rises, the pink crystals become dark, which is derived from the carbonization of MIDA2- ligands (Figure S34, S36). Besides, the variable-temperature FT-IR spectra have been collected to study the thermal stability. As shown in Figure S35, S37, the characteristic peaks in the corresponding FT-IR spectra can be still kept. As the temperature rises to 300 °C, the *ν*(-COO-) vibration bands in IR spectra completely disappeared, which indicated the removal of CH3COO- and MIDA2-.

# Section 6. Magnetic Studies

**
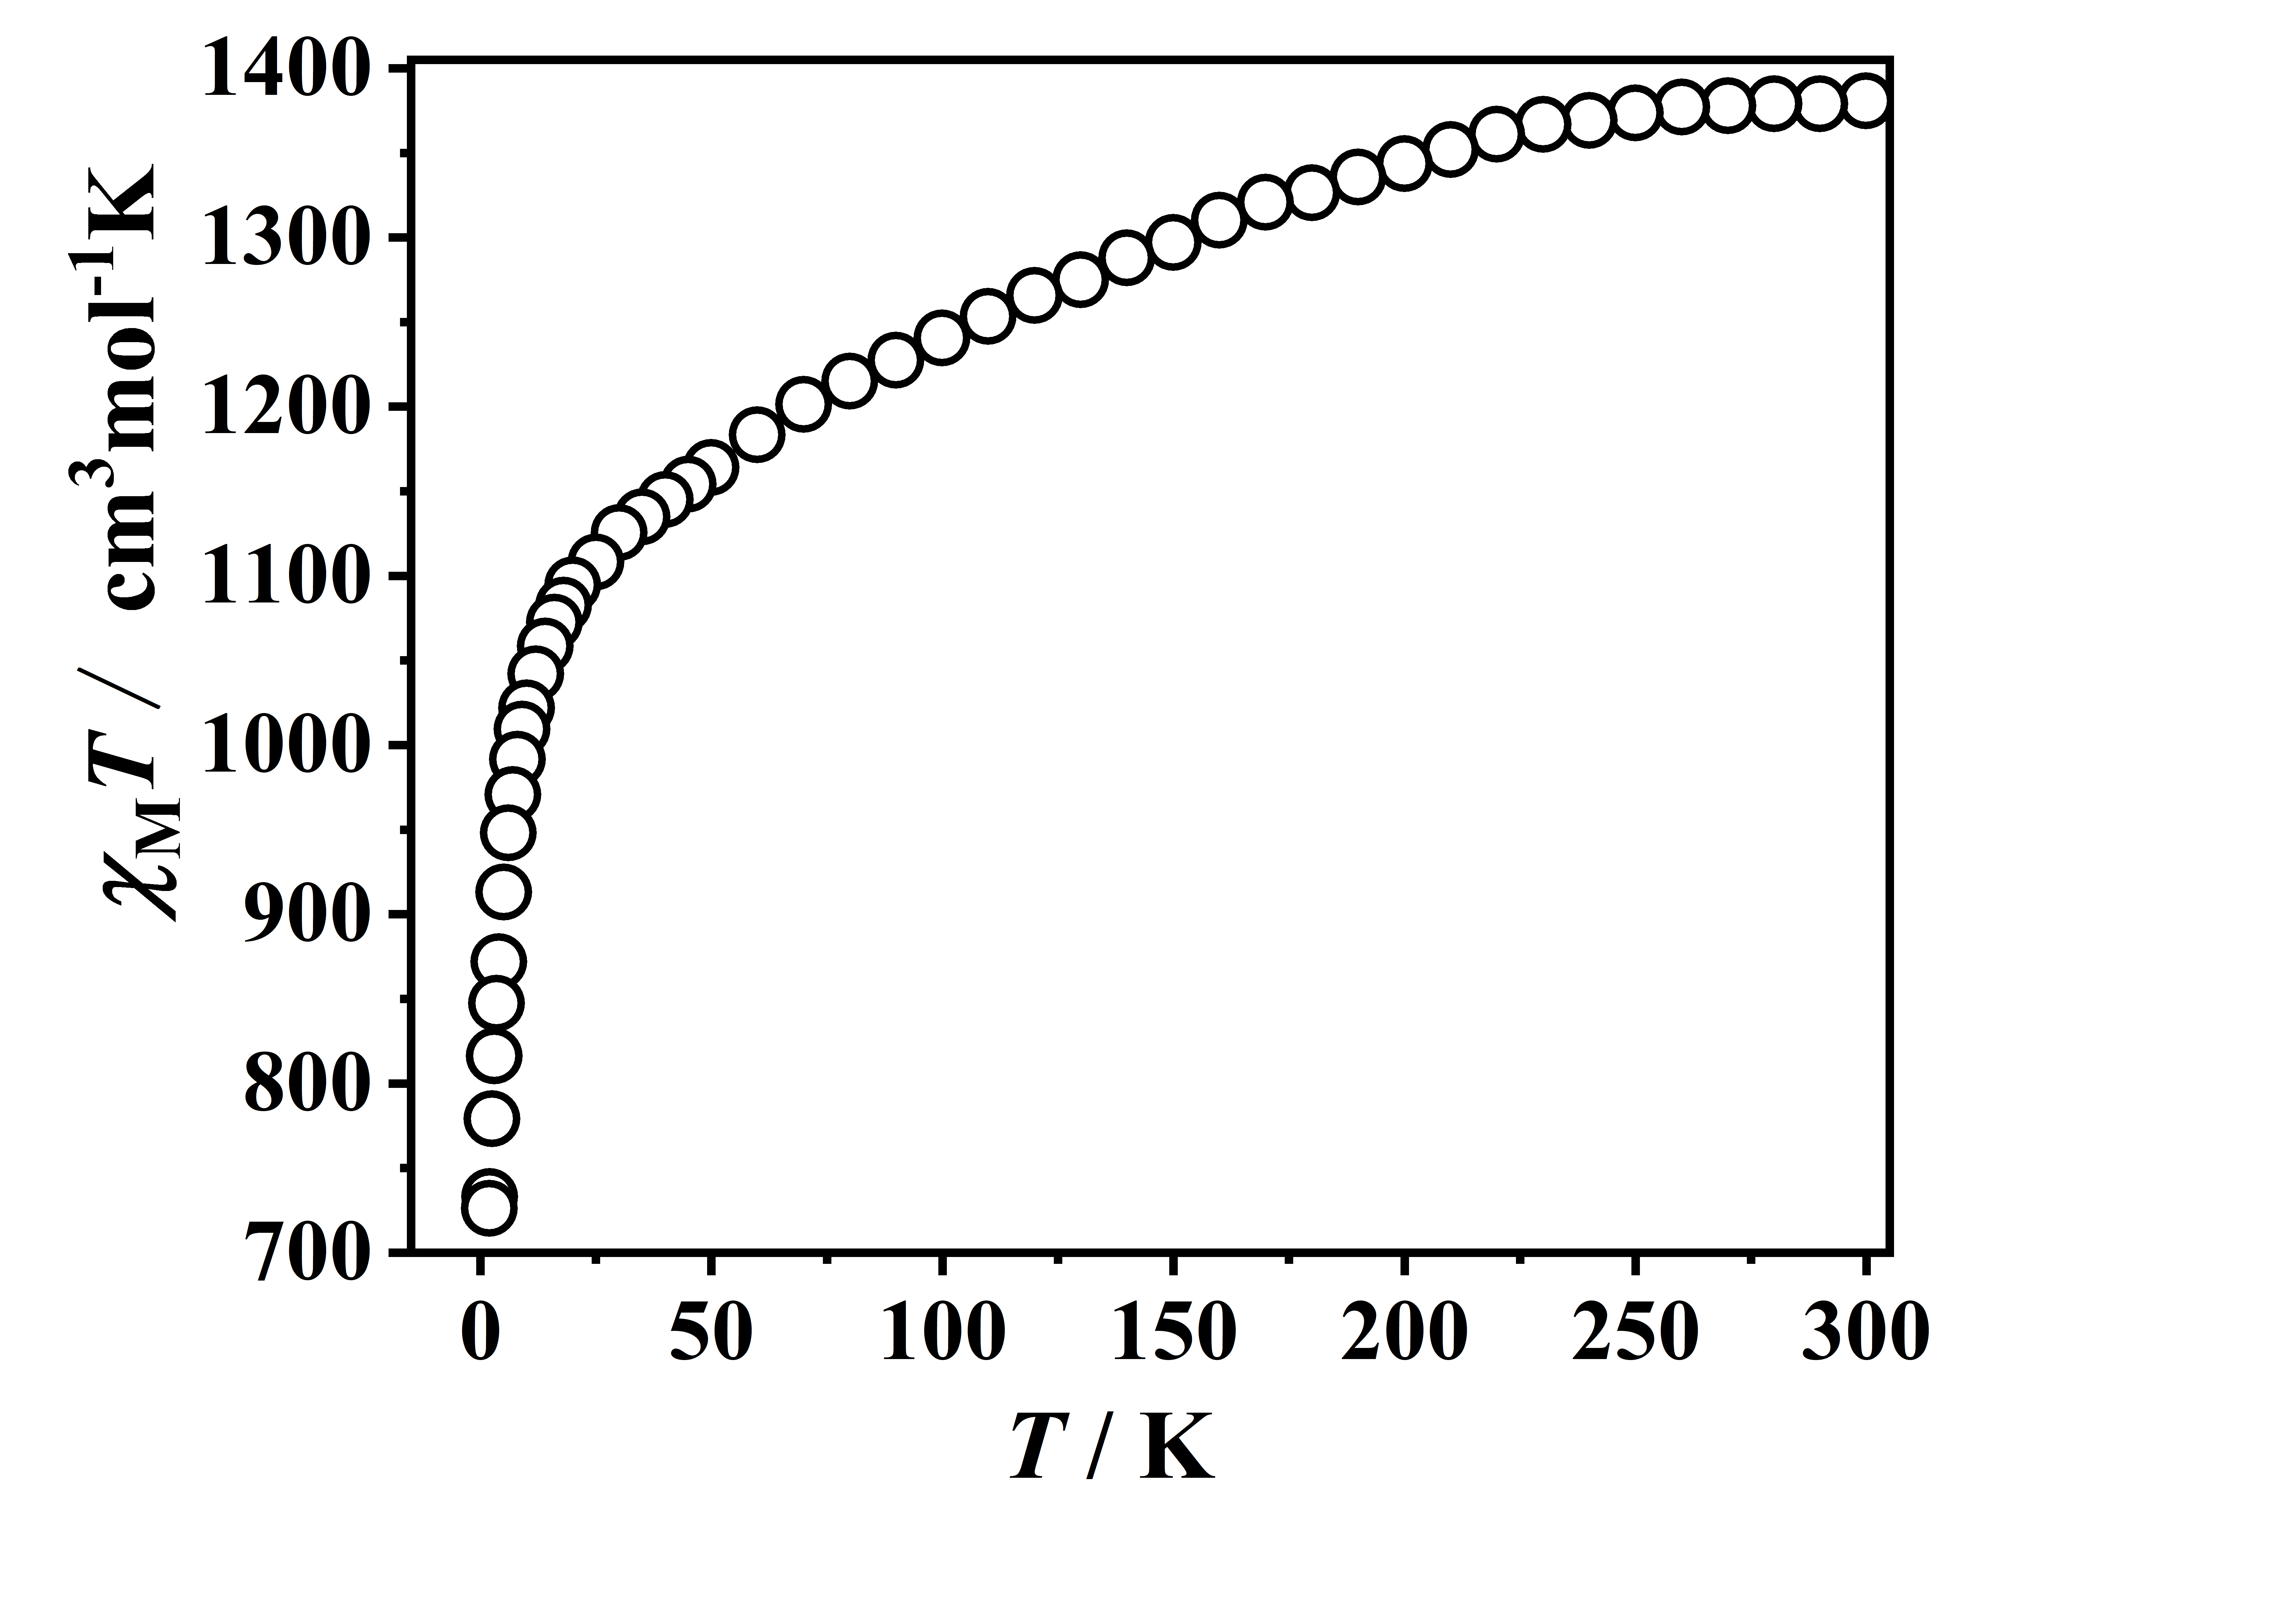
**

**Figure S38.** Magnetic susceptibility versus temperature from 1.8 to 300 K under 1.0 kOe dc field for **Cl12@Gd158Co38**.


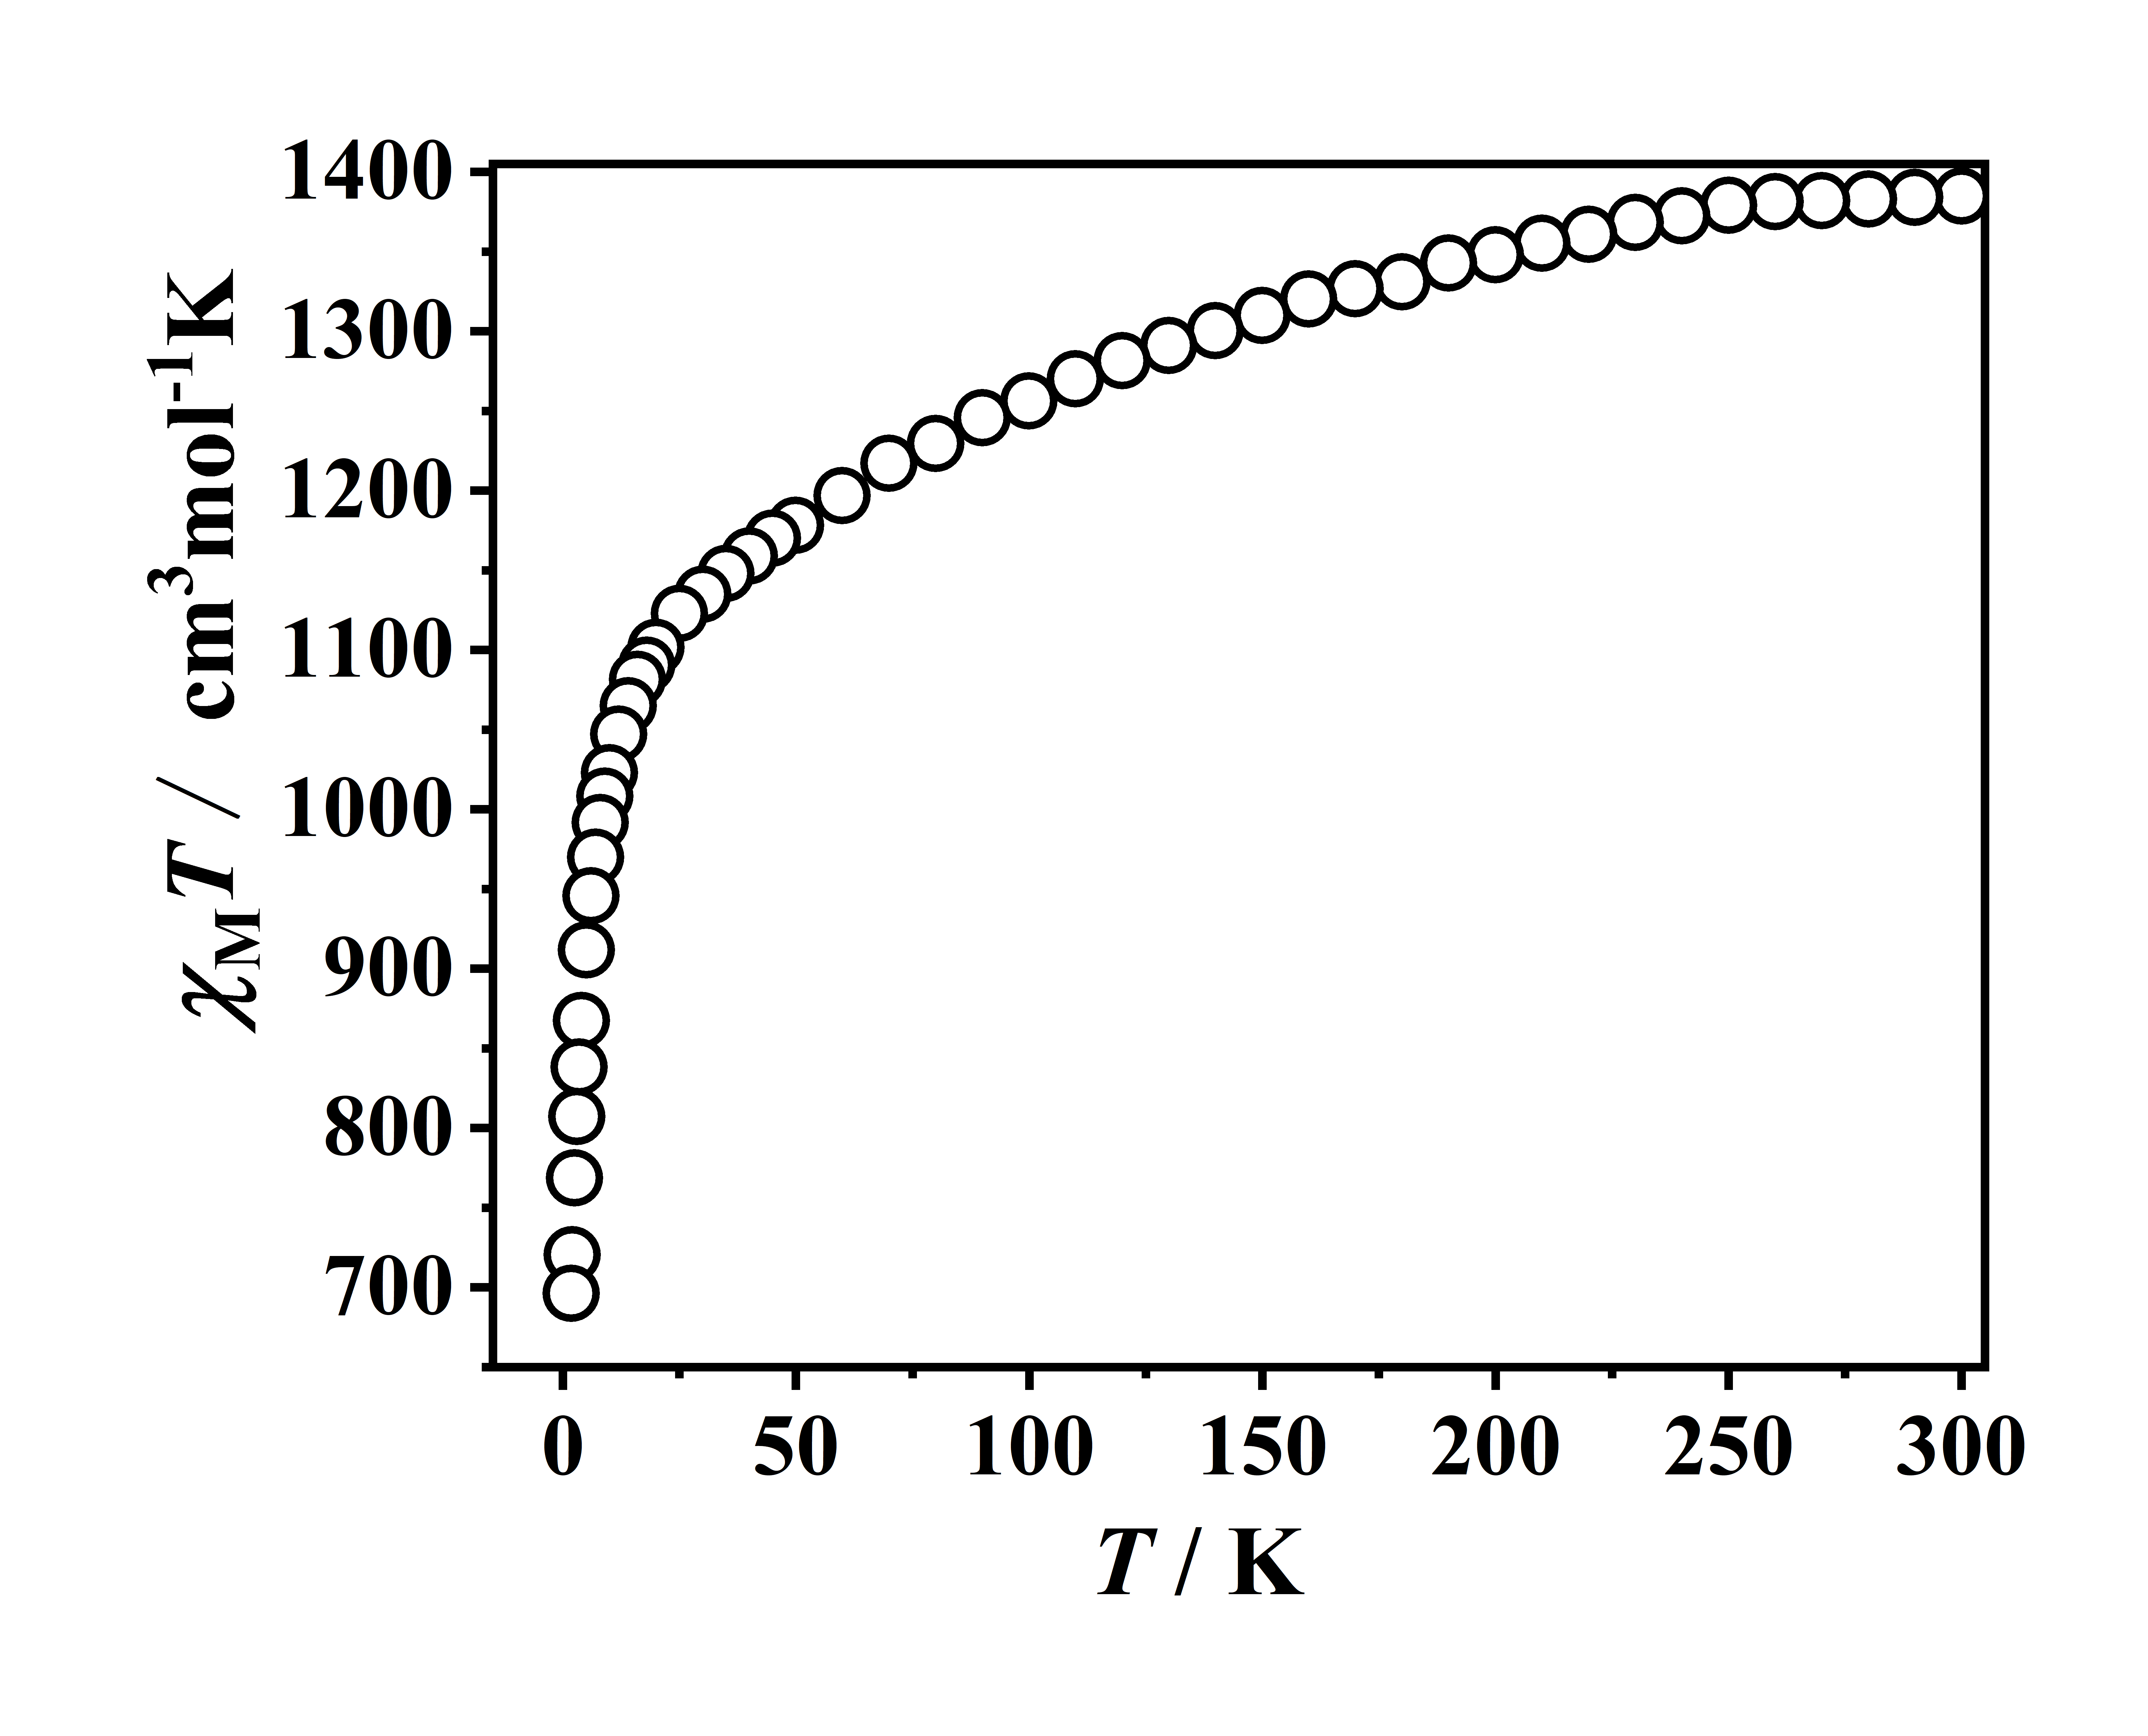


**Figure S39.** Magnetic susceptibility versus temperature from 1.8 to 300 K under 1.0 kOe dc field for **Br12@Gd158Co38**.

**
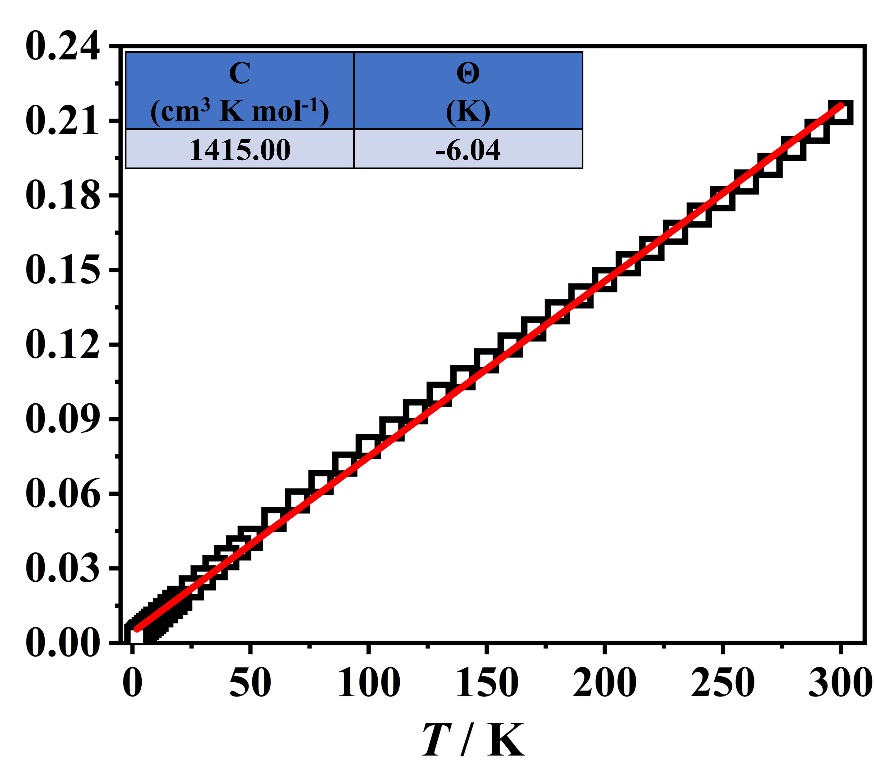
**

**Figure S40.** *χ*M-1 versus *T* plot of complex **Cl12@Gd158Co38**. The red line is fitting result with *χ*M = *C* /(*T*- *θ*).


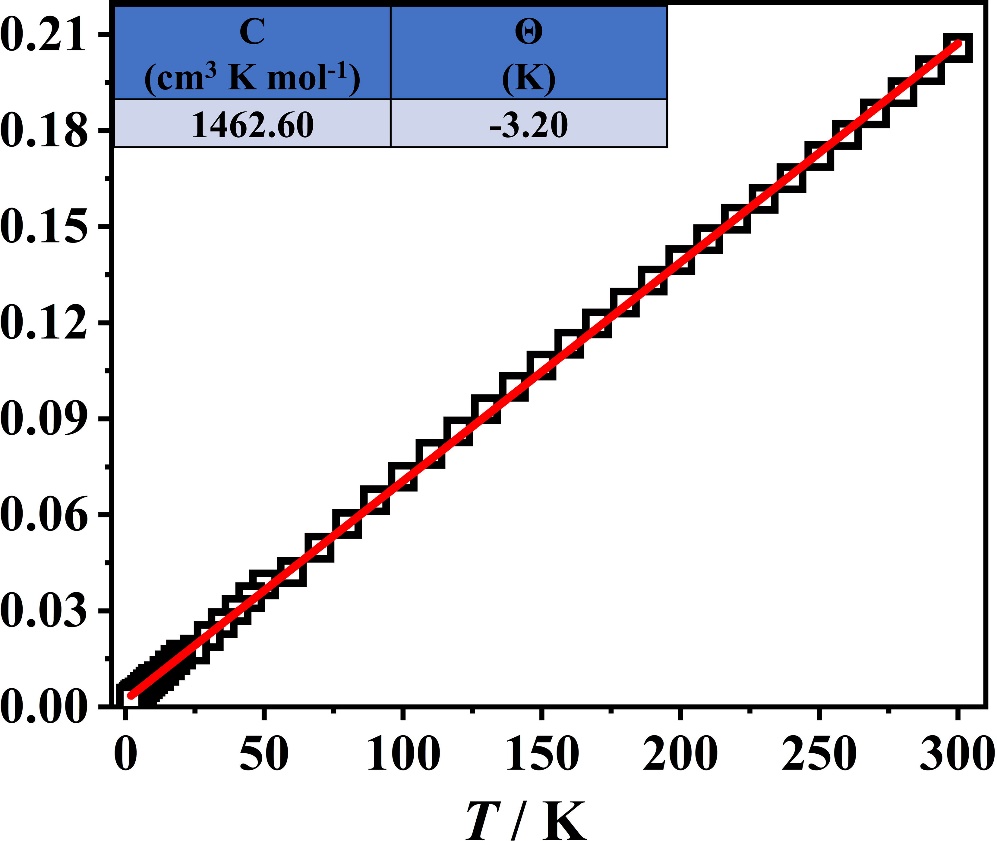


**Figure S41.** *χ*M-1 versus *T* plot of complex **Br12@Gd158Co38**. The red line is fitting result with *χ*M = *C* /(*T*- *θ*).

**
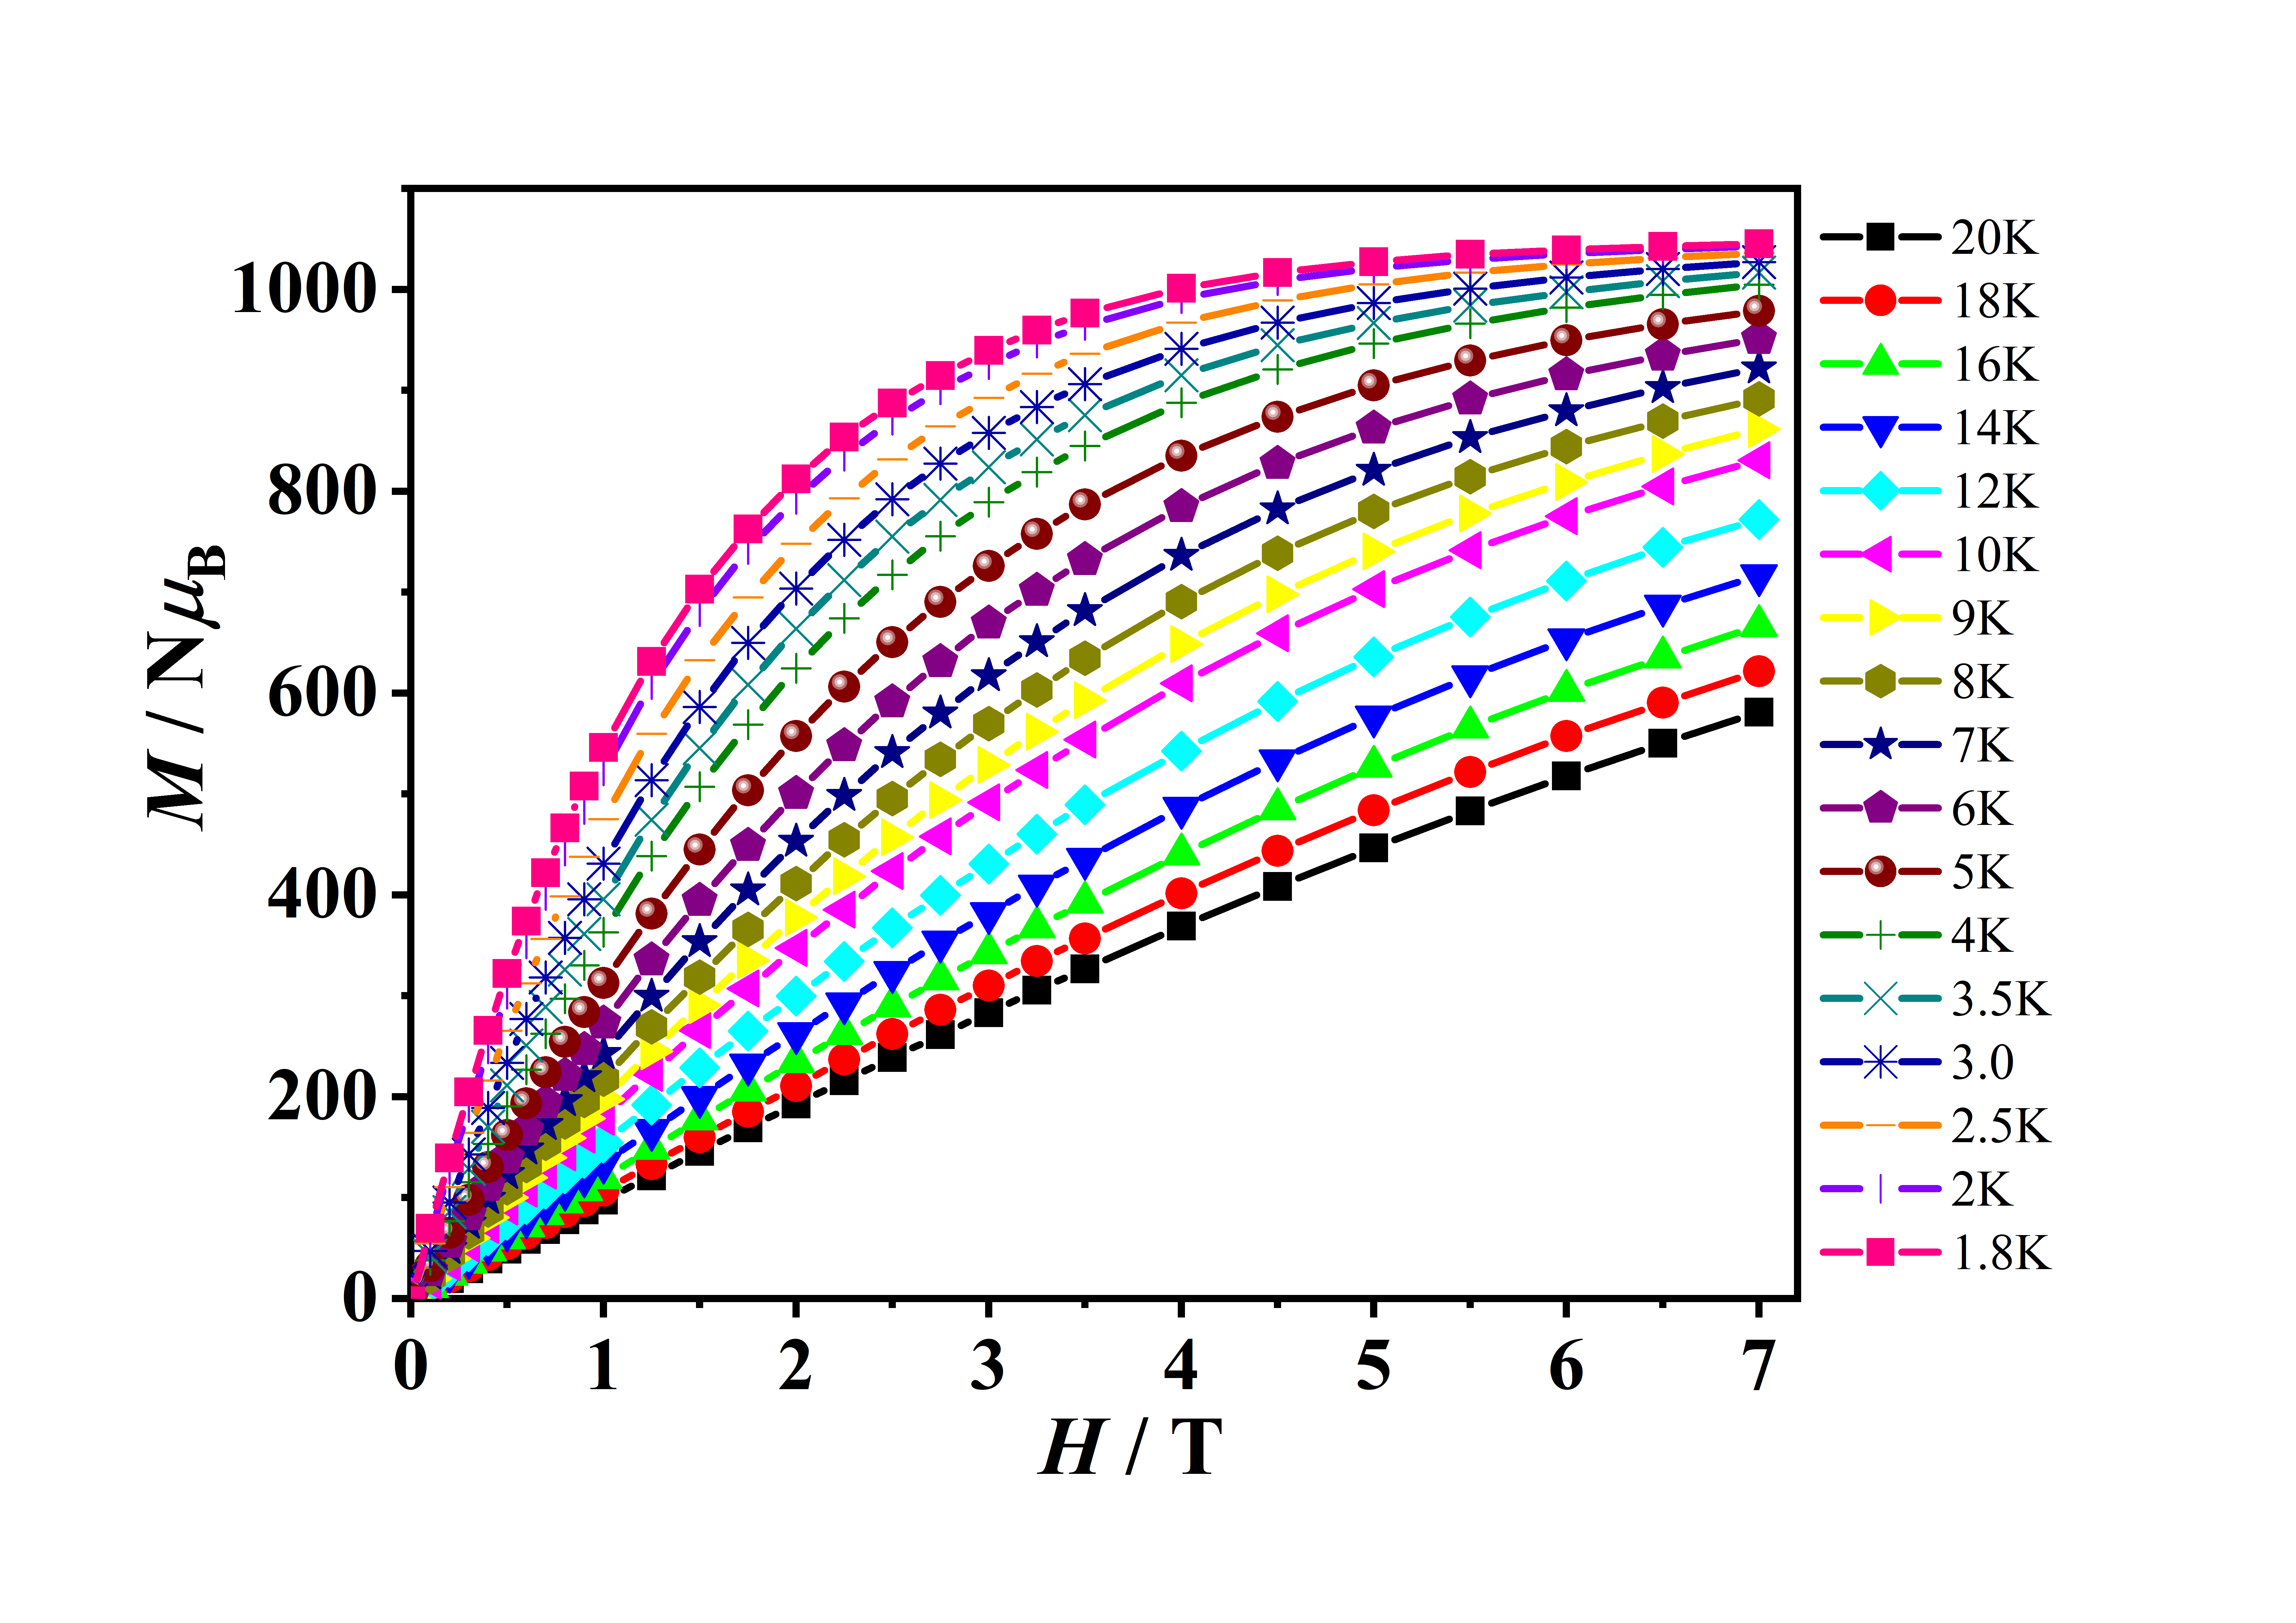
**

**Figure S42.** The isothermal field-dependence magnetization at low temperatures for **Cl12@Gd158Co38**. (1.8 - 20 K).


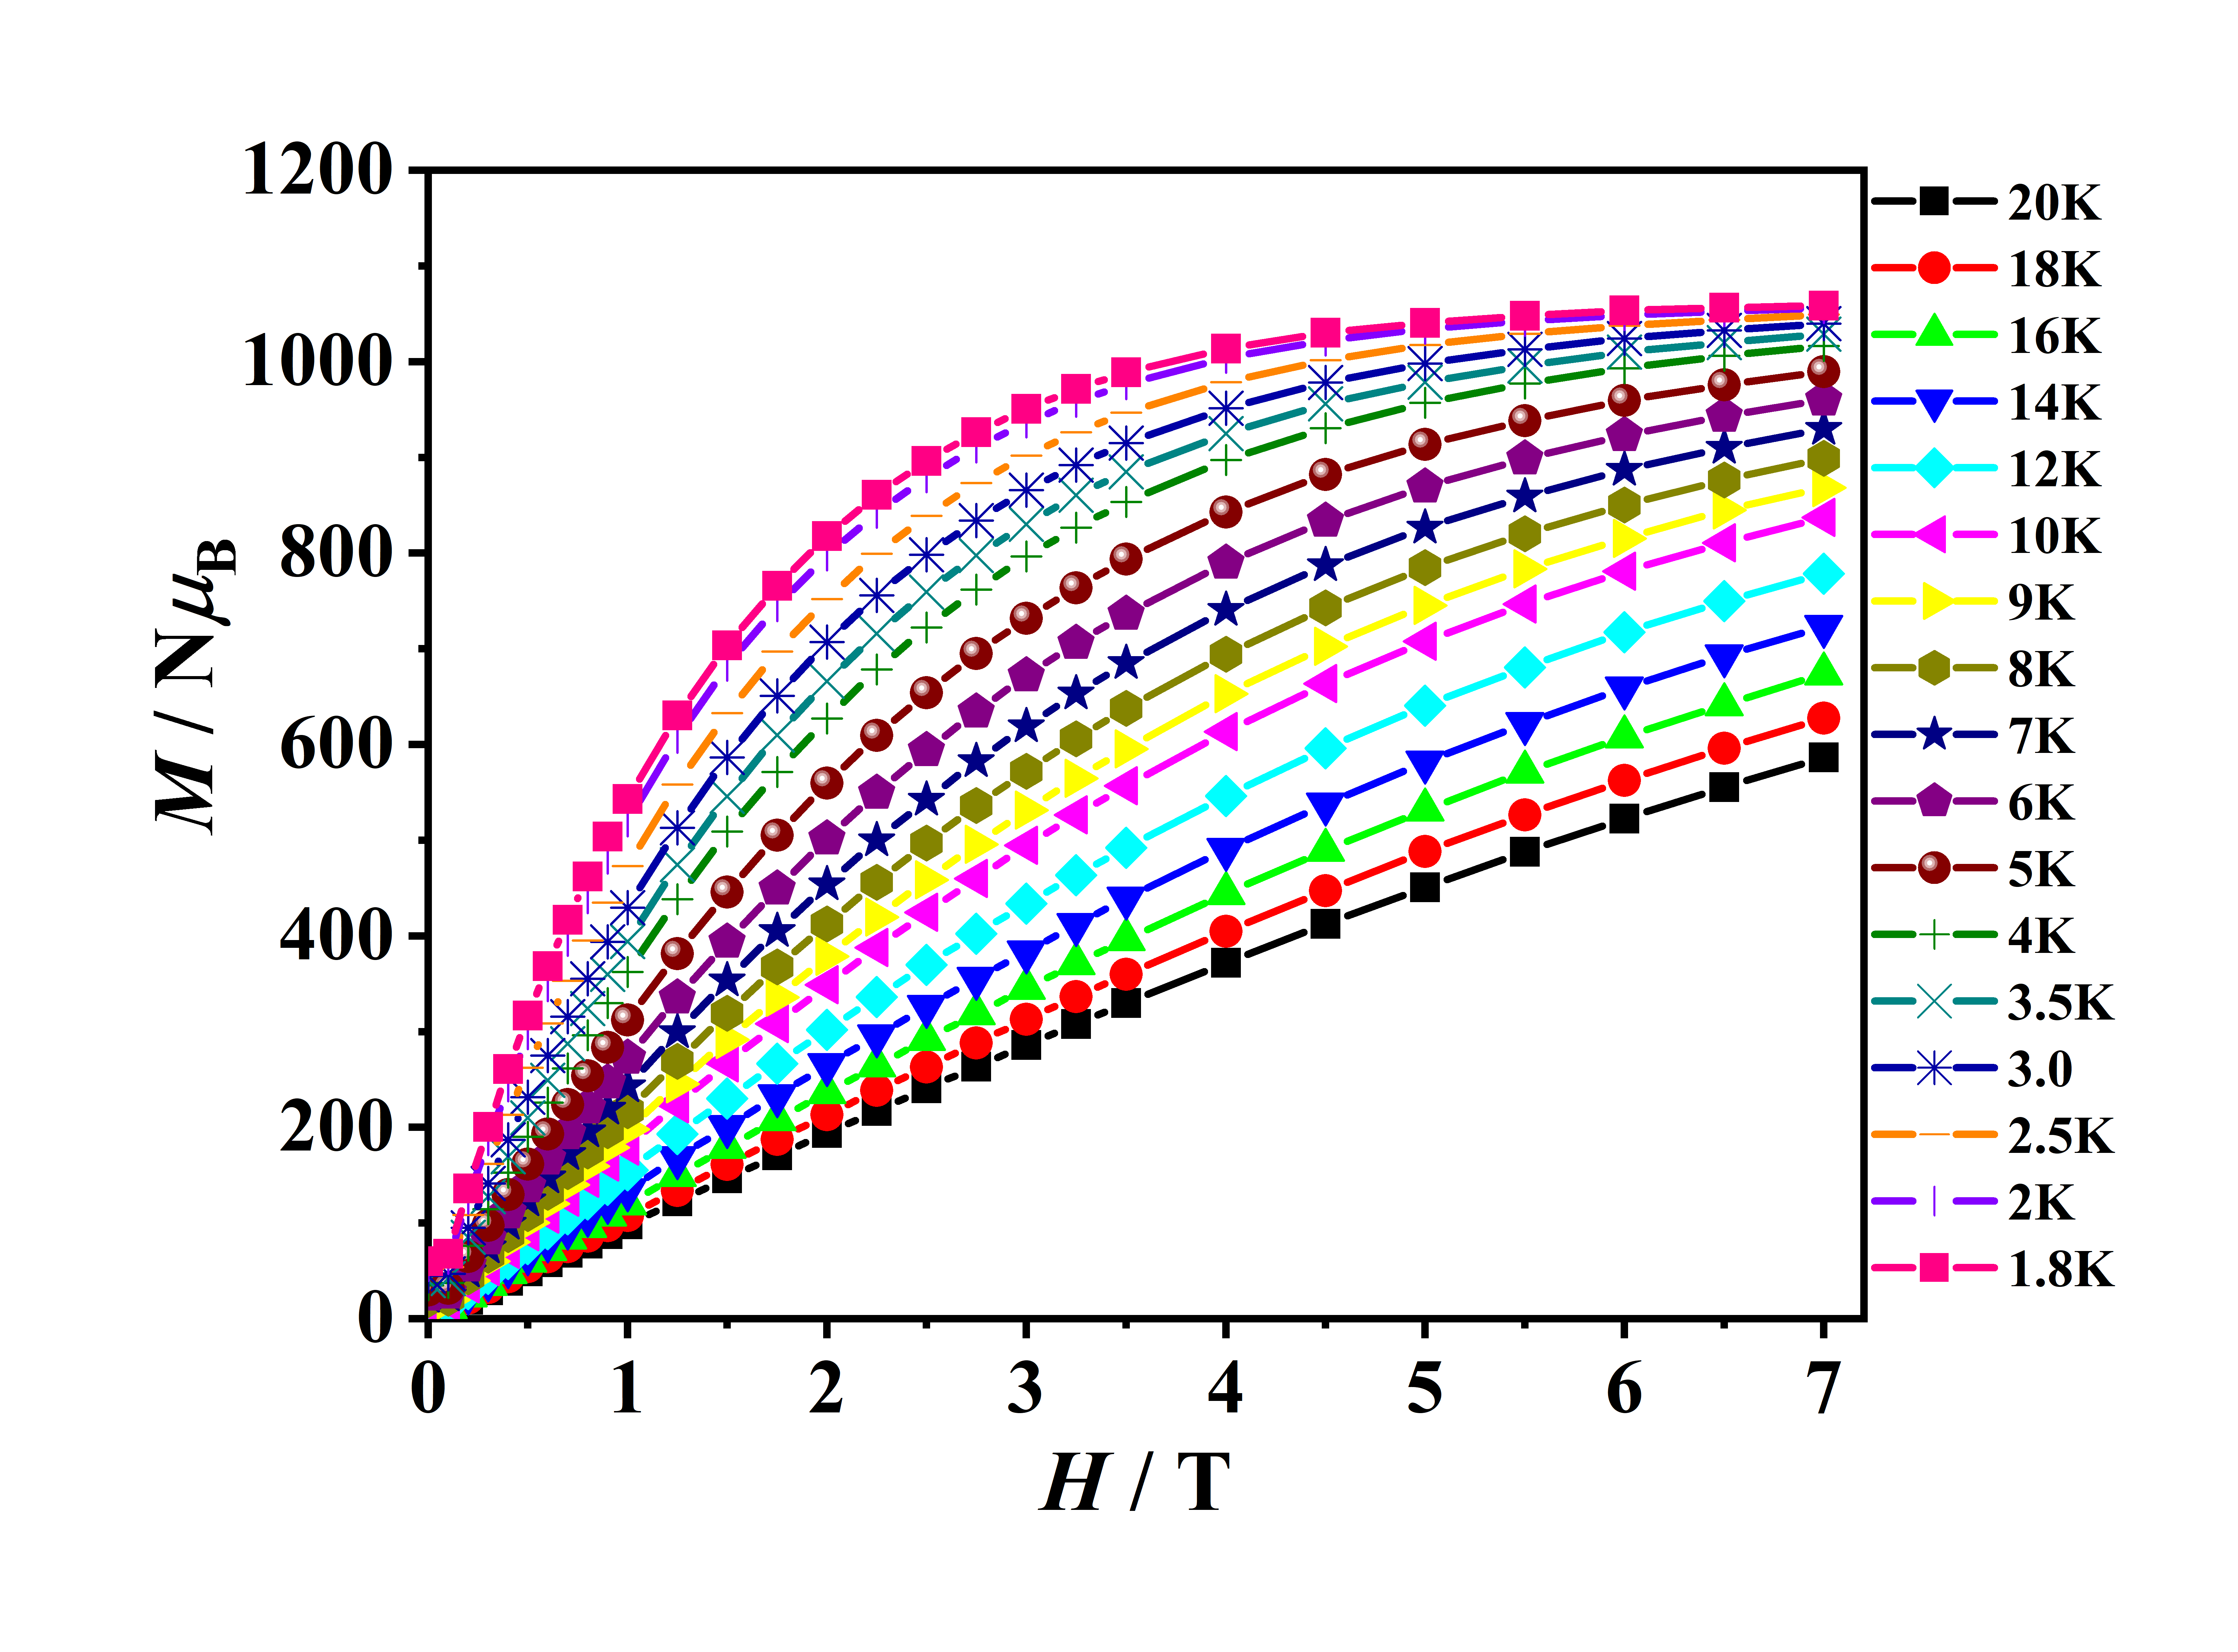


**Figure S43.** The isothermal field-dependence magnetization at low temperatures for **Cl12@Gd158Co38**. (1.8 - 20 K).


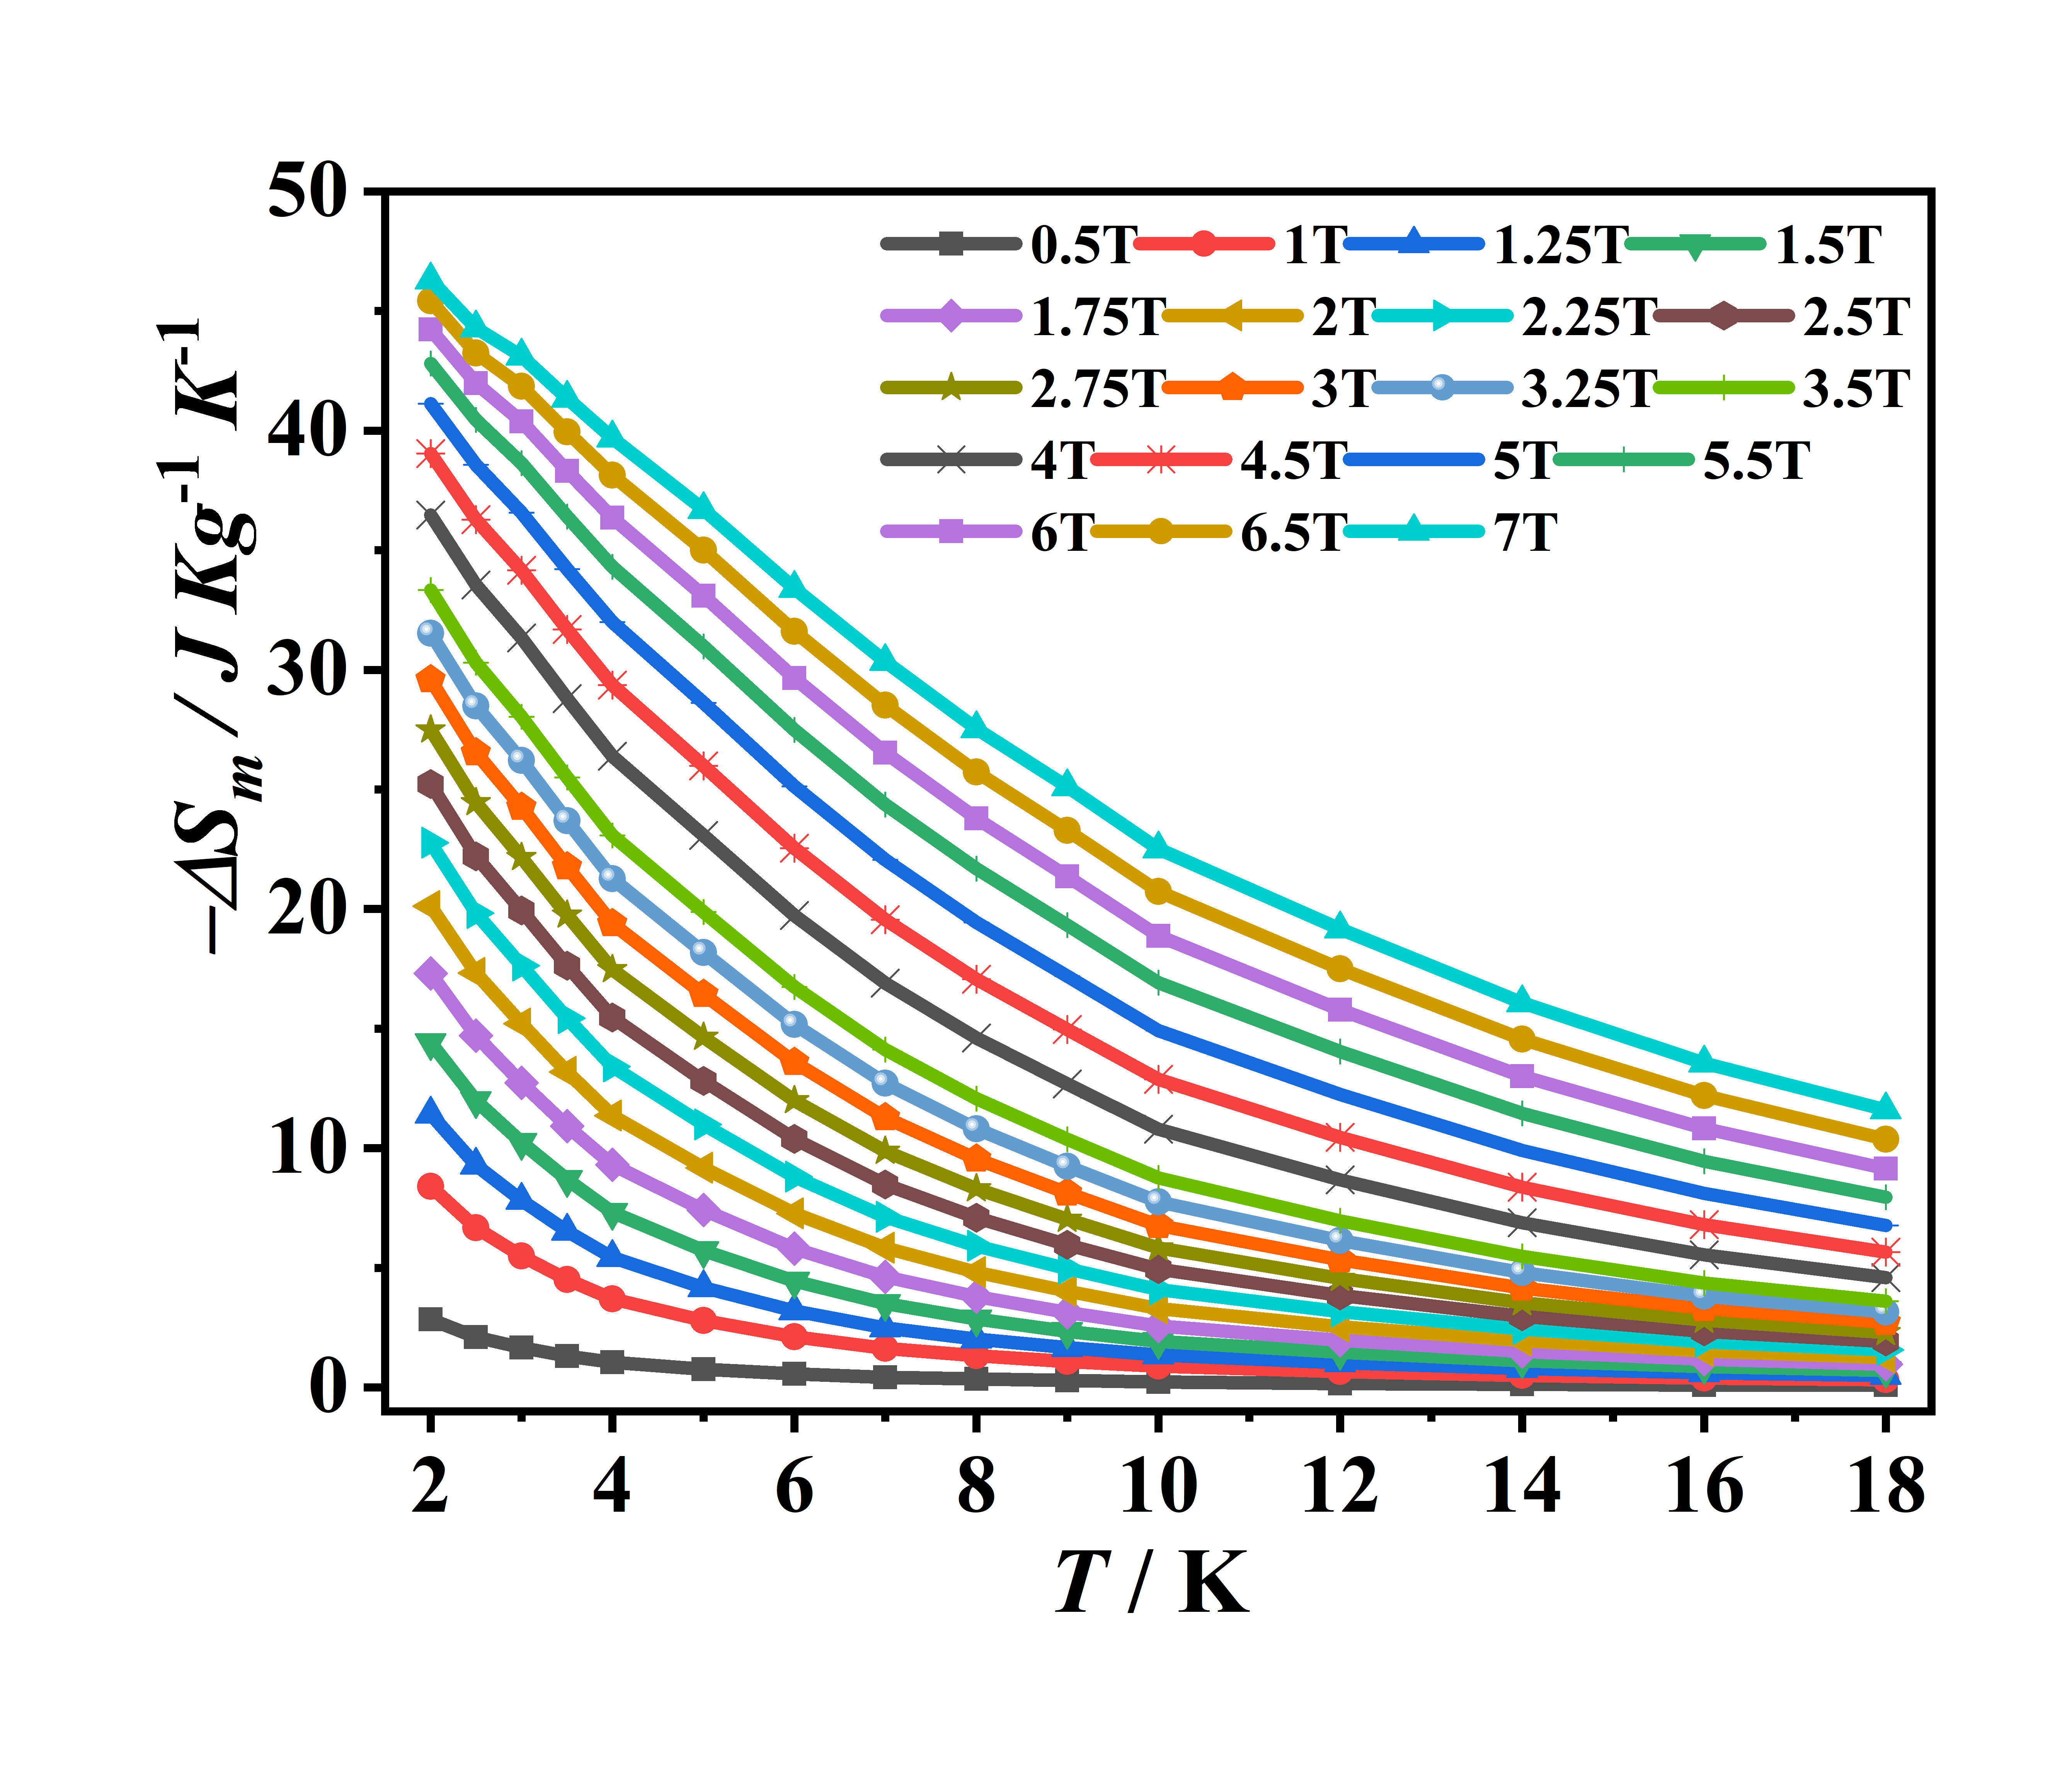


**Figure S44.** Values of -∆*S*m calculated from the magnetization data for **Cl12@Gd158Co38** at various ﬁelds (0.50-7.00 T) and temperatures (1.8 - 18 K).

**Table S6.** Summary of some reported –Δ*S*m for 3d–4f clusters.

| Compound | –Δ*S*m  (J kg–1 K–1) | –Δ*S*m  (J kg–1 K–1)  theoretical value | *T*  (K) | Δ*H*  (T) | Ref |
| --- | --- | --- | --- | --- | --- |
| **{Cl12@Gd158Co38}** | **46.95** | **64.6** | **2.0** | **7.0** | **This work** |
| **{Br12@Gd158Co38}** | **46.30** | **62.3** | **2.0** | **7.0** | **This work** |
| {Gd96Ni64} | 42.8 | 54.1 | 3.0 | 7.0 | 8 |
| {Gd102Ni36} | 41.3 | 49.3 | 2.0 | 7.0 | 12 |
| {Gd52Ni56} | 40.5 | 52.4 | 3.0 | 7.0 | 13 |
| {Gd78Ni64} | 40.6 | 65.2 | 3.0 | 7.0 | 9 |
| {Gd42Co10} | 41.3 | 51.9 | 2.0 | 7.0 | 14 |
| {Gd45Co7} | 40.5 | 53.0 | 2.0 | 7.0 | 15 |
| {Gd3Cr2} | 38.3 | 43.4 | 2.0 | 7.0 | 16 |
| {Gd45Ni7} | 38.4 | 52.7 | 2.0 | 7.0 | 15 |
| {Gd42Ni10} | 38.2 | 49.1 | 2.0 | 7.0 | 14 |
| {Gd4Ni5} | 37.3 | 49.9 | 3.0 | 7.0 | 17 |
| {Gd18Co7} | 36.9 | 43.8 | 2.0 | 7.0 | 18 |
| {Gd36Ni12} | 36.3 | 64.8 | 3.0 | 7.0 | 19 |
| {Gd40Ni44} | 36.0 | 61.2 | 3.0 | 7.0 | 6 |
| {Gd52Ni52} | 35.6 | 62.3 | 4.2 | 7.0 | 20 |
| {Gd8Cr4} | 33.8 | 50.0 | 2.0 | 7.0 | 21 |
| {Gd6Mn4} | 33.7 | 41.8 | 3.0 | 7.0 | 22 |
| {Gd9Co2} | 33.1 | 39.6 | 3.0 | 7.0 | 23 |
| {Gd10Co4} | 32.6 | 41.9 | 2.0 | 7.0 | 24 |
| {Gd4Co5} | 31.0 | 54.5 | 3.5 | 7.0 | 17 |
| {Gd8Co6} | 28.6 | 47.6 | 3.0 | 7.0 | 25 |
| {Gd9Mn9} | 28.0 | 41.8 | 3.0 | 7.0 | 26 |
| {Gd6Co2} | 27.8 | 31.3 | 3.0 | 7.0 | 23 |
| {Gd6Cu6} | 27.4 | 28.3 | 3.0 | 7.0 | 27 |
| {Gd6Ni6} | 26.5 | 37.4 | 3.0 | 7.0 | 28 |
| {Gd24Co16} | 26.0 | 44.6 | 3.8 | 7.0 | 29 |
| {Gd5Cr2} | 25.2 | 34.5 | 5.0 | 7.0 | 21 |
| {Gd6Cu6} | 23.5 | 28.3 | 2.3 | 9.0 | 30 |
| {Gd4Ni8} | 23.0 | 34.4 | 3.8 | 7.0 | 31 |
| {Gd7Cu15} | 22.2 | 33.5 | 2.5 | 9.0 | 32 |
| {Gd24Cu36} | 21.0 | 35.7 | 2.1 | 7.0 | 33 |
| {Gd4Co8} | 19.9 | 48.3 | 4.0 | 7.0 | 31 |

**Table S7.** Summary some -*∆S*m at low-field for published Gd-based heterometallic metal clusters.

| Compound | *-ΔSm*  (J·kg-1·K-1)  2.0 T | *-ΔSm*  (J·kg-1·K-1)  1.0 T | T  (K) | *Ref* |
| --- | --- | --- | --- | --- |
| {1-(Gd18Ni24)n} | 20.95 | 12.25 | 2.0 | 34 |
| {**Cl12@Co38Gd158**} | **20.81** | **8.83** | **2.0** | **This work** |
| {**Br12@Co38Gd158**} | **20.13** | **8.39** | **2.0** | **This work** |
| {Ni21Gd20} | 19.8 | 14.1 | 2.0/1.1 | 35 |
| {Ni64Gd96} | 17 | 7.0 | 3.0 | 8 |
| {Co4Gd10} | 15 | 3.7 | 3.0 | 24 |
| {Co10Gd42} | 14 | 5.0 | 2.0 | 14 |
| {Ni10Gd42} | 13.5 | 4.8 | 2.0 | 14 |
| {Mn4Gd6} | 13.5 | 5.0 | 2.0 | 22 |

# Section 6. Tables

**Table S8.** The selected bond lengths (Å) and bond angles (°) for **Cl12@Gd158Co38**.

| Gd(1)-O(12) | 2.415(12) | Gd(6)-O(53)#4 | 2.531(13) | Co(1)-O(91)#3 | 2.021(16) |
| --- | --- | --- | --- | --- | --- |
| Gd(1)-O(58)#1 | 2.429(12) | Gd(6)-O(3) | 2.860(12) | Co(1)-O(48) | 2.069(13) |
| Gd(1)-O(46)#2 | 2.434(12) | Gd(7)-O(95)#1 | 2.389(15) | Co(1)-O(13W) | 2.091(17) |
| Gd(1)-O(19) | 2.485(12) | Gd(7)-O(40) | 2.384(12) | Co(1)-O(10A) | 2.091(17) |
| Gd(1)-O(55)#1 | 2.492(12) | Gd(7)-O(14) | 2.384(12) | Co(1)-O(110) | 2.117(15) |
| Gd(1)-O(2) | 2.483(12) | Gd(7)-O(54) | 2.397(13) | Co(1)-O(111) | 2.119(18) |
| Gd(1)-O(10) | 2.482(12) | Gd(7)-O(68) | 2.451(13) | Co(1)-N(7) | 2.17(2) |
| Gd(1)-O(47) | 2.491(12) | Gd(7)-O(39) | 2.453(12) | Co(2)-O(108) | 2.042(14) |
| Gd(1)-O(13) | 2.519(12) | Gd(7)-O(57) | 2.484(14) | Co(2)-O(8W) | 2.043(15) |
| Gd(2)-O(86)#3 | 2.314(13) | Gd(7)-O(94)#1 | 2.516(14) | Co(2)-O(80) | 2.076(13) |
| Gd(2)-O(11) | 2.360(12) | Gd(8)-O(23)#1 | 2.407(11) | Co(2)-O(73) | 2.118(13) |
| Gd(2)-O(10) | 2.380(13) | Gd(8)-O(5) | 2.414(12) | Co(2)-N(4) | 2.154(17) |
| Gd(2)-O(46)#2 | 2.411(11) | Gd(8)-O(62) | 2.421(13) | Co(2)-O(28) | 2.240(14) |
| Gd(2)-O(27)#2 | 2.419(12) | Gd(8)-O(19)#1 | 2.432(12) | Co(3)-O(116) | 2.018(16) |
| Gd(2)-O(1) | 2.439(12) | Gd(8)-O(64) | 2.438(12) | Co(3)-O(10B) | 2.082(16) |
| Gd(2)-O(51)#1 | 2.512(12) | Gd(8)-O(47)#1 | 2.450(12) | Co(3)-O(12W) | 2.082(16) |
| Gd(2)-O(18) | 2.508(11) | Gd(8)-O(4)#1 | 2.487(12) | Co(3)-O(41) | 2.069(13) |
| Gd(3)-O(6) | 2.369(12) | Gd(8)-O(109) | 2.528(13) | Co(3)-O(89) | 2.106(17) |
| Gd(3)-O(23)#1 | 2.404(11) | Gd(8)-O(16)#1 | 2.772(12) | Co(3)-O(92) | 2.155(15) |
| Gd(3)-O(31) | 2.427(12) | Gd(8)-C(9A)#1 | 3.000(18) | Co(3)-N(6) | 2.17(2) |
| Gd(3)-O(55)#1 | 2.425(12) | Gd(9)-O(5) | 2.351(12) | Co(4)-O(83) | 2.098(14) |
| Gd(3)-O(62) | 2.423(12) | Gd(9)-O(118)#4 | 2.365(14) | Co(4)-O(83)#3 | 2.098(14) |
| Gd(3)-O(2) | 2.463(12) | Gd(9)-O(64) | 2.394(13) | Co(4)-O(83)#2 | 2.098(14) |
| Gd(3)-O(15) | 2.520(12) | Gd(9)-O(44) | 2.384(13) | Co(4)-O(10W) | 2.113(17) |
| Gd(3)-O(35) | 2.523(13) | Gd(9)-O(45) | 2.420(14) | Co(4)-O(10W)#2 | 2.113(18) |
| Gd(3)-O(21) | 2.833(13) | Gd(9)-O(61) | 2.424(12) | Co(4)-O(10W)#3 | 2.113(17) |
| Gd(4)-O(27) | 2.424(12) | Gd(9)-O(72) | 2.509(13) | Co(5)-O(84) | 2.091(14) |
| Gd(4)-O(27)#3 | 2.424(12) | Gd(9)-N(1) | 2.667(18) | Co(5)-O(49) | 2.111(12) |
| Gd(4)-O(27)#2 | 2.424(12) | Gd(10)-O(75)#4 | 2.378(13) | Co(5)-O(6W) | 2.137(17) |
| Gd(4)-O(11)#2 | 2.507(12) | Gd(10)-O(87)#2 | 2.389(14) | Co(5)-O(7W) | 2.125(16) |
| Gd(4)-O(11)#3 | 2.507(12) | Gd(10)-O(42)#4 | 2.371(14) | Co(5)-O(1W) | 2.108(17) |
| Gd(4)-O(11) | 2.507(12) | Gd(10)-O(76)#2 | 2.400(14) | Co(5)-O(42) | 2.096(14) |
| Gd(4)-O(25)#2 | 2.503(13) | Gd(10)-O(66) | 2.452(13) | Co(6)-O(82) | 2.057(15) |
| Gd(4)-O(25)#3 | 2.503(13) | Gd(10)-O(9) | 2.490(12) | Co(6)-O(52) | 2.033(15) |
| Gd(4)-O(25) | 2.503(13) | Gd(10)-O(84)#4 | 2.499(14) | Co(6)-O(36) | 2.056(13) |
| Gd(5)-O(67) | 2.329(13) | Gd(10)-O(79) | 2.525(12) | Co(6)-O(78) | 2.104(13) |
| Gd(5)-O(47) | 2.368(12) | Gd(10)-O(8) | 2.573(12) | Co(6)-N(5) | 2.162(18) |
| Gd(5)-O(55) | 2.392(11) | Gd(11)-O(9) | 2.334(12) | Co(6)-O(81) | 2.216(14) |
| Gd(5)-O(12) | 2.396(11) | Gd(11)-O(54) | 2.361(13) | Co(7)-O(101) | 2.062(15) |
| Gd(5)-O(58) | 2.415(12) | Gd(11)-O(57) | 2.366(13) | Co(7)-O(96) | 2.097(15) |
| Gd(5)-O(23) | 2.454(12) | Gd(11)-O(66) | 2.375(13) | Co(7)-O(70) | 2.132(13) |
| Gd(5)-O(51)#4 | 2.528(12) | Gd(11)-O(37) | 2.387(12) | Co(7)-O(100) | 2.116(15) |
| Gd(5)-O(18)#2 | 2.525(12) | Gd(11)-O(117) | 2.404(16) | Co(7)-N(2) | 2.189(18) |
| Gd(6)-O(7) | 2.383(12) | Gd(11)-O(24) | 2.419(13) | Co(7)-O(9W) | 2.22(2) |
|  |  |  |  |  |  |
| O(12)-Gd(1)-O(58)#1 | 74.1(4) | O(86)#3-Gd(2)-O(11) | 82.3(4) | O(91)#3-Co(1)-O(48) | 98.8(6) |
| O(58)#1-Gd(1)-O(46)#2 | 74.0(4) | O(11)-Gd(2)-O(10) | 133.4(4) | O(48)-Co(1)-O(13W) | 97.5(6) |
| O(58)#1-Gd(1)-O(19) | 137.6(4) | O(11)-Gd(2)-O(46)#2 | 119.3(4) | O(48)-Co(1)-O(10A) | 97.5(6) |
| O(46)#2-Gd(1)-O(19) | 139.1(4) | O(10)-Gd(2)-O(46)#2 | 69.9(4) | O(91)#3-Co(1)-O(110) | 91.1(6) |
| O(12)-Gd(1)-O(55)#1 | 72.2(4) | O(86)#3-Gd(2)-O(27)#2 | 152.3(4) | O(48)-Co(1)-O(110) | 85.8(6) |
| O(58)#1-Gd(1)-O(55)#1 | 68.1(4) | O(11)-Gd(2)-O(27)#2 | 70.2(4) | O(13W)-Co(1)-O(110) | 175.2(7) |
| O(46)#2-Gd(1)-O(55)#1 | 134.4(4) | O(10)-Gd(2)-O(27)#2 | 118.6(4) | O(10A)-Co(1)-O(110) | 175.2(7) |
| O(19)-Gd(1)-O(55)#1 | 69.7(4) | O(46)#2-Gd(2)-O(27)#2 | 53.4(4) | O(91)#3-Co(1)-O(111) | 177.2(7) |
| O(12)-Gd(1)-O(2) | 139.4(4) | O(86)#3-Gd(2)-O(1) | 93.0(4) | O(48)-Co(1)-O(111) | 84.0(6) |
| O(58)#1-Gd(1)-O(2) | 89.4(4) | O(11)-Gd(2)-O(1) | 68.4(4) | O(13W)-Co(1)-O(111) | 88.1(7) |
| O(46)#2-Gd(1)-O(2) | 137.2(4) | O(10)-Gd(2)-O(1) | 68.7(4) | O(10A)-Co(1)-O(111) | 88.1(7) |
| O(19)-Gd(1)-O(2) | 78.1(4) | O(46)#2-Gd(2)-O(1) | 80.6(4) | O(110)-Co(1)-O(111) | 88.7(7) |
| O(55)#1-Gd(1)-O(2) | 67.2(4) | O(27)#2-Gd(2)-O(1) | 80.0(4) | O(91)#3-Co(1)-N(7) | 98.0(8) |
| O(12)-Gd(1)-O(10) | 134.4(4) | O(86)#3-Gd(2)-O(51)#1 | 81.4(4) | O(48)-Co(1)-N(7) | 158.3(7) |
| O(58)#1-Gd(1)-O(10) | 72.1(4) | O(11)-Gd(2)-O(51)#1 | 139.6(4) | O(13W)-Co(1)-N(7) | 95.5(7) |
| O(46)#2-Gd(1)-O(10) | 67.8(4) | O(10)-Gd(2)-O(51)#1 | 80.3(4) | O(10A)-Co(1)-N(7) | 95.5(7) |
| O(19)-Gd(1)-O(10) | 136.1(4) | O(46)#2-Gd(2)-O(51)#1 | 90.2(4) | O(110)-Co(1)-N(7) | 80.3(7) |
| O(55)#1-Gd(1)-O(10) | 120.1(4) | O(27)#2-Gd(2)-O(51)#1 | 117.7(4) | O(111)-Co(1)-N(7) | 79.2(7) |
| O(2)-Gd(1)-O(10) | 69.6(4) | O(1)-Gd(2)-O(51)#1 | 149.0(4) | O(108)-Co(2)-O(8W) | 92.9(7) |
| O(12)-Gd(1)-O(47) | 68.0(4) | O(86)#3-Gd(2)-O(18) | 82.5(4) | O(108)-Co(2)-O(80) | 97.5(6) |
| O(58)#1-Gd(1)-O(47) | 134.5(4) | O(11)-Gd(2)-O(18) | 80.9(4) | O(8W)-Co(2)-O(80) | 98.1(6) |
| O(46)#2-Gd(1)-O(47) | 72.1(4) | O(10)-Gd(2)-O(18) | 139.6(4) | O(108)-Co(2)-O(73) | 87.8(6) |
| O(19)-Gd(1)-O(47) | 67.0(4) | O(46)#2-Gd(2)-O(18) | 116.2(4) | O(8W)-Co(2)-O(73) | 176.5(7) |
| O(55)#1-Gd(1)-O(47) | 120.1(4) | O(27)#2-Gd(2)-O(18) | 90.0(4) | O(80)-Co(2)-O(73) | 85.1(5) |
| O(2)-Gd(1)-O(47) | 136.0(4) | O(1)-Gd(2)-O(18) | 149.3(4) | O(108)-Co(2)-N(4) | 107.7(7) |
| O(10)-Gd(1)-O(47) | 119.7(4) | O(51)#1-Gd(2)-O(18) | 60.4(4) | O(8W)-Co(2)-N(4) | 96.1(7) |

**Table S9.** The selected bond lengths (Å) and bond angles (°) for **Br12@Gd158Co38Br18**.

| Gd(1)-O(12A) | 2.344(10) | Gd(5)-O(22B) | 2.409(9) | Gd(9)-O(33A) | 2.521(8) |
| --- | --- | --- | --- | --- | --- |
| Gd(1)-O(27B) | 2.359(9) | Gd(5)-O(23B) | 2.419(10) | Gd(9)-O(27A)#2 | 2.527(9) |
| Gd(1)-O(22B) | 2.365(9) | Gd(5)-O(26B) | 2.419(9) | Gd(9)-O(26A)#2 | 2.543(10) |
| Gd(1)-O(19A) | 2.405(9) | Gd(5)-O(32A)#3 | 2.449(9) | Gd(9)-O(1) | 2.551(9) |
| Gd(1)-O(21A) | 2.409(9) | Gd(5)-O(24A) | 2.492(9) | Gd(10)-O(34) | 2.350(9) |
| Gd(1)-O(25B) | 2.438(9) | Gd(5)-O(27A) | 2.505(9) | Gd(10)-O(12B) | 2.359(9) |
| Gd(1)-O(43A)#1 | 2.502(9) | Gd(5)-O(33A)#3 | 2.822(9) | Gd(10)-O(11B) | 2.360(10) |
| Gd(1)-O(20A)#2 | 2.516(9) | Gd(5)-C(11A)#3 | 3.035(14) | Gd(10)-O(24B) | 2.376(9) |
| Gd(1)-C(7A) | 2.874(13) | Gd(6)-O(44A) | 2.413(9) | Gd(10)-O(23B) | 2.392(9) |
| Gd(2)-O(19A) | 2.410(9) | Gd(6)-O(44A)#4 | 2.414(9) | Gd(10)-O(1C) | 2.478(10) |
| Gd(2)-O(45A)#1 | 2.413(9) | Gd(6)-O(44A)#1 | 2.414(9) | Gd(10)-O(1W) | 2.499(9) |
| Gd(2)-O(21A)#3 | 2.426(9) | Gd(6)-O(14A)#1 | 2.480(9) | Gd(10)-O(5A) | 2.648(11) |
| Gd(2)-O(32A)#4 | 2.473(9) | Gd(6)-O(14A) | 2.480(9) | Gd(11)-O(10B)#2 | 2.380(9) |
| Gd(2)-O(22A)#3 | 2.477(9) | Gd(6)-O(14A)#4 | 2.480(9) | Gd(11)-O(1B) | 2.382(9) |
| Gd(2)-O(27B) | 2.479(9) | Gd(6)-O(21B) | 2.487(9) | Gd(11)-O(1A) | 2.413(9) |
| Gd(2)-O(15B)#4 | 2.481(9) | Gd(6)-O(21B)#1 | 2.487(9) | Gd(11)-O(2A) | 2.417(9) |
| Gd(2)-O(22B)#3 | 2.493(9) | Gd(6)-O(21B)#4 | 2.487(9) | Gd(11)-O(11B)#2 | 2.444(9) |
| Gd(2)-O(17A) | 2.504(9) | Gd(7)-O(9B) | 2.384(9) | Gd(11)-O(24B)#2 | 2.455(9) |
| Gd(3)-O(11A)#1 | 2.316(9) | Gd(7)-O(28A) | 2.393(10) | Gd(11)-O(3B) | 2.466(10) |
| Gd(3)-O(15B)#1 | 2.369(9) | Gd(7)-O(12B) | 2.402(9) | Gd(11)-O(24A)#2 | 2.484(9) |
| Gd(3)-O(21B)#1 | 2.372(9) | Gd(7)-O(11B) | 2.441(9) | Gd(11)-O(33A) | 2.539(9) |
| Gd(3)-O(45A) | 2.405(9) | Gd(7)-O(8B) | 2.450(9) | Gd(12)-O(36B)#1 | 2.384(9) |
| Gd(3)-O(44A) | 2.417(9) | Gd(7)-O(7) | 2.501(9) | Gd(12)-O(18B) | 2.385(9) |
| Gd(3)-O(18B)#1 | 2.444(9) | Gd(7)-O(26A)#2 | 2.523(10) | Gd(12)-O(21B) | 2.418(9) |
| Gd(3)-O(20A)#5 | 2.501(9) | Gd(7)-O(25A)#2 | 2.530(9) | Gd(12)-O(19B) | 2.422(9) |
| Gd(3)-O(43A)#4 | 2.505(9) | Gd(7)-O(23A) | 2.555(9) | Gd(12)-O(20B) | 2.427(9) |
| Gd(3)-C(15A) | 2.879(14) | Gd(8)-O(14B) | 2.363(9) | Gd(12)-O(14A)#1 | 2.460(9) |
| Gd(3)-Gd(8)#1 | 3.8663(9) | Gd(8)-O(18B) | 2.383(9) | Gd(12)-O(15A) | 2.488(9) |
| Gd(4)-O(25B) | 2.405(9) | Gd(8)-O(15B) | 2.414(9) | Gd(12)-O(34A)#1 | 2.518(10) |
| Gd(4)-O(26B) | 2.406(9) | Gd(8)-O(19B) | 2.428(9) | Gd(12)-O(13A)#1 | 2.859(9) |
| Gd(4)-O(29B) | 2.412(9) | Gd(8)-O(16B) | 2.434(8) | Gd(13)-O(9B) | 2.364(9) |
| Gd(4)-O(22A)#3 | 2.413(9) | Gd(8)-O(17A)#1 | 2.452(9) | Gd(13)-O(5A) | 2.371(9) |
| Gd(4)-O(28B) | 2.427(9) | Gd(8)-O(35A)#1 | 2.464(10) | Gd(13)-O(6B) | 2.380(9) |
| Gd(4)-O(27B) | 2.433(8) | Gd(8)-O(31A) | 2.483(9) | Gd(13)-O(5B) | 2.405(9) |
| Gd(4)-O(18A) | 2.477(10) | Gd(8)-O(16A)#1 | 2.865(9) | Gd(13)-O(12) | 2.430(10) |
| Gd(4)-O(25A) | 2.511(9) | Gd(9)-O(6B) | 2.369(9) | Gd(13)-O(12B) | 2.435(10) |
| Gd(4)-O(23A)#3 | 2.770(9) | Gd(9)-O(1A) | 2.396(9) | Gd(13)-O(13B) | 2.463(11) |
| Gd(4)-C(8A)#3 | 3.020(15) | Gd(9)-O(7B) | 2.400(9) | Gd(13)-O(34) | 2.520(10) |
| Gd(5)-O(24B) | 2.367(9) | Gd(9)-O(4B) | 2.402(9) | Gd(14)-O(10B) | 2.368(9) |
| Gd(5)-O(25B) | 2.387(8) | Gd(9)-O(5B) | 2.488(10) | Gd(14)-O(2B)#3 | 2.387(10) |
|  |  |  |  |  |  |
| O(12A)-Gd(1)-O(27B) | 80.8(3) | O(45A)#1-Gd(2)-O(22B)#3 | 133.5(3) | O(3A)-Co(1)-O(7B) | 96.9(4) |
| O(12A)-Gd(1)-O(22B) | 81.9(3) | O(21A)#3-Gd(2)-O(22B)#3 | 67.9(3) | O(3A)-Co(1)-O(31) | 88.9(4) |
| O(27B)-Gd(1)-O(22B) | 133.6(3) | O(32A)#4-Gd(2)-O(22B)#3 | 67.2(3) | O(7B)-Co(1)-O(31) | 97.0(4) |
| O(12A)-Gd(1)-O(19A) | 151.3(3) | O(22A)#3-Gd(2)-O(22B)#3 | 70.1(3) | O(3A)-Co(1)-O(1) | 90.3(4) |
| O(27B)-Gd(1)-O(19A) | 70.5(3) | O(27B)-Gd(2)-O(22B)#3 | 120.2(3) | O(7B)-Co(1)-O(1) | 85.7(4) |
| O(22B)-Gd(1)-O(19A) | 119.2(3) | O(15B)#4-Gd(2)-O(22B)#3 | 119.8(3) | O(31)-Co(1)-O(1) | 177.2(4) |
| O(12A)-Gd(1)-O(21A) | 152.1(3) | O(19A)-Gd(2)-O(17A) | 137.6(3) | O(3A)-Co(1)-N(1) | 102.7(5) |
| O(27B)-Gd(1)-O(21A) | 119.8(3) | O(45A)#1-Gd(2)-O(17A) | 90.8(3) | O(7B)-Co(1)-N(1) | 156.8(5) |
| O(22B)-Gd(1)-O(21A) | 70.2(3) | O(21A)#3-Gd(2)-O(17A) | 140.2(3) | O(31)-Co(1)-N(1) | 95.6(5) |
| O(19A)-Gd(1)-O(21A) | 53.6(3) | O(32A)#4-Gd(2)-O(17A) | 77.7(3) | O(1)-Co(1)-N(1) | 82.0(4) |
| O(12A)-Gd(1)-O(25B) | 91.2(3) | O(22A)#3-Gd(2)-O(17A) | 77.1(3) | O(3A)-Co(1)-O(3) | 177.9(4) |
| O(27B)-Gd(1)-O(25B) | 68.9(3) | O(27B)-Gd(2)-O(17A) | 69.3(3) | O(7B)-Co(1)-O(3) | 85.1(4) |
| O(22B)-Gd(1)-O(25B) | 68.8(3) | O(15B)#4-Gd(2)-O(17A) | 67.8(3) | O(31)-Co(1)-O(3) | 91.0(4) |
| O(19A)-Gd(1)-O(25B) | 80.3(3) | O(22B)#3-Gd(2)-O(17A) | 135.6(3) | O(1)-Co(1)-O(3) | 89.7(4) |
| O(21A)-Gd(1)-O(25B) | 80.6(3) | O(11A)#1-Gd(3)-O(15B)#1 | 82.3(3) | N(1)-Co(1)-O(3) | 75.2(4) |
| O(12A)-Gd(1)-O(43A)#1 | 83.7(3) | O(11A)#1-Gd(3)-O(21B)#1 | 81.9(3) | O(3B)-Co(2)-O(1B) | 82.3(4) |
| O(27B)-Gd(1)-O(43A)#1 | 80.7(3) | O(15B)#1-Gd(3)-O(21B)#1 | 133.6(3) | O(3B)-Co(2)-O(2B) | 82.0(4) |
| O(22B)-Gd(1)-O(43A)#1 | 139.2(3) | O(11A)#1-Gd(3)-O(45A) | 152.0(3) | O(1B)-Co(2)-O(2B) | 82.1(4) |
| O(19A)-Gd(1)-O(43A)#1 | 89.9(3) | O(15B)#1-Gd(3)-O(45A) | 70.0(3) | O(3B)-Co(2)-O(4W) | 93.0(4) |
| O(21A)-Gd(1)-O(43A)#1 | 116.3(3) | O(21B)#1-Gd(3)-O(45A) | 120.1(3) | O(1B)-Co(2)-O(4W) | 93.7(4) |
| O(25B)-Gd(1)-O(43A)#1 | 149.6(3) | O(11A)#1-Gd(3)-O(44A) | 152.2(3) | O(2B)-Co(2)-O(4W) | 173.8(4) |
| O(12A)-Gd(1)-O(20A)#2 | 83.8(3) | O(15B)#1-Gd(3)-O(44A) | 119.2(3) | O(3B)-Co(2)-O(5W) | 174.0(4) |
| O(27B)-Gd(1)-O(20A)#2 | 139.4(3) | O(21B)#1-Gd(3)-O(44A) | 70.4(3) | O(1B)-Co(2)-O(5W) | 93.5(4) |
| O(22B)-Gd(1)-O(20A)#2 | 80.2(3) | O(45A)-Gd(3)-O(44A) | 53.9(3) | O(2B)-Co(2)-O(5W) | 93.3(4) |
| O(19A)-Gd(1)-O(20A)#2 | 117.0(3) | O(11A)#1-Gd(3)-O(18B)#1 | 92.9(3) | O(4W)-Co(2)-O(5W) | 91.5(4) |
| O(21A)-Gd(1)-O(20A)#2 | 89.6(3) | O(15B)#1-Gd(3)-O(18B)#1 | 68.8(3) | O(3B)-Co(2)-O(6W) | 93.6(4) |
| O(25B)-Gd(1)-O(20A)#2 | 149.0(3) | O(21B)#1-Gd(3)-O(18B)#1 | 68.7(3) | O(1B)-Co(2)-O(6W) | 173.4(4) |
| O(43A)#1-Gd(1)-O(20A)#2 | 60.3(3) | O(45A)-Gd(3)-O(18B)#1 | 81.0(3) | O(2B)-Co(2)-O(6W) | 92.3(4) |
| O(19A)-Gd(2)-O(45A)#1 | 73.5(3) | O(44A)-Gd(3)-O(18B)#1 | 80.3(3) | O(4W)-Co(2)-O(6W) | 91.7(4) |
| O(19A)-Gd(2)-O(21A)#3 | 73.0(3) | O(11A)#1-Gd(3)-O(20A)#5 | 81.7(3) | O(5W)-Co(2)-O(6W) | 90.2(4) |
| O(45A)#1-Gd(2)-O(21A)#3 | 72.9(3) | O(15B)#1-Gd(3)-O(20A)#5 | 80.2(3) | O(30A)-Co(3)-O(3W) | 93.2(4) |
| O(19A)-Gd(2)-O(32A)#4 | 139.2(3) | O(21B)#1-Gd(3)-O(20A)#5 | 139.4(3) | O(30A)-Co(3)-O(8B) | 97.4(4) |
| O(45A)#1-Gd(2)-O(32A)#4 | 137.1(3) | O(45A)-Gd(3)-O(20A)#5 | 89.5(3) | O(3W)-Co(3)-O(8B) | 100.0(4) |
| O(21A)#3-Gd(2)-O(32A)#4 | 89.8(3) | O(44A)-Gd(3)-O(20A)#5 | 117.4(3) | O(30A)-Co(3)-O(7) | 87.4(4) |
| O(19A)-Gd(2)-O(22A)#3 | 89.7(3) | O(18B)#1-Gd(3)-O(20A)#5 | 149.0(3) | O(3W)-Co(3)-O(7) | 174.5(4) |
| O(45A)#1-Gd(2)-O(22A)#3 | 139.4(3) | O(11A)#1-Gd(3)-O(43A)#4 | 82.1(3) | O(8B)-Co(3)-O(7) | 85.3(4) |
| O(21A)#3-Gd(2)-O(22A)#3 | 137.7(3) | O(15B)#1-Gd(3)-O(43A)#4 | 139.3(3) | O(30A)-Co(3)-N(2) | 108.2(5) |
| O(32A)#4-Gd(2)-O(22A)#3 | 78.5(3) | O(21B)#1-Gd(3)-O(43A)#4 | 80.6(3) | O(3W)-Co(3)-N(2) | 94.2(5) |
| O(19A)-Gd(2)-O(27B) | 68.5(3) | O(45A)-Gd(3)-O(43A)#4 | 116.5(3) | O(8B)-Co(3)-N(2) | 149.9(5) |
| O(45A)#1-Gd(2)-O(27B) | 72.7(3) | O(44A)-Gd(3)-O(43A)#4 | 90.1(3) | O(7)-Co(3)-N(2) | 80.4(4) |
| O(21A)#3-Gd(2)-O(15B)#4 | 72.4(3) | O(25B)-Gd(4)-O(22A)#3 | 82.9(3) | O(9)-Co(4)-O(4) | 96.2(4) |
| O(32A)#4-Gd(2)-O(15B)#4 | 69.4(3) | O(26B)-Gd(4)-O(22A)#3 | 149.0(3) | O(9)-Co(4)-O(6) | 89.4(4) |
| O(22A)#3-Gd(2)-O(15B)#4 | 136.2(3) | O(29B)-Gd(4)-O(22A)#3 | 117.2(3) | O(4)-Co(4)-O(6) | 94.1(4) |
| O(27B)-Gd(2)-O(15B)#4 | 120.0(3) | O(25B)-Gd(4)-O(28B) | 109.1(3) | O(9)-Co(4)-O(11) | 158.1(4) |
| O(19A)-Gd(2)-O(22B)#3 | 72.0(3) | O(26B)-Gd(4)-O(28B) | 70.2(3) | O(4)-Co(4)-O(11) | 105.3(4) |

# Supplementary References

1. X. M. Luo, Z. B. Hu, Q. F. Lin, W. Cheng, J. P. Cao, C. H. Cui, H. Mei, Y. Song, Y. Xu, *J. Am. Chem. Soc*. **2018**, *140*, 11219-11222.
2. X. M. Luo, N.-F. Li, Z.-B. Hu, J.-P. Cao, C.-H. Cui, Q.-F. Lin, Y. Xu, *Inorg. Chem*. **2019**, *58*, 2463-2470.
3. C. Cui, W. W. Ju, X. M. Luo, Q. F. Lin, J. P. Cao, Y. Xu, *Inorg. Chem*. **2018**, 57, 8608-8614.
4. W.-X. Chen, G.-L. Zhuang, S.-T. Wu, *Z. Anorg. Allg. Chem.* **2013**, *639*, 817-820.
5. R. Meier, M. Molinier, C. Anson, A. K. Powell, B. Eldik, R. V.Bernd, *Dalton Trans*. **2006**, *46*, 5506-5514.
6. N.-F. Li, Q.-F. Lin, X.-M. Luo, J.-P. Cao, Y. Xu, *Inorg. Chem*. **2019**, *58*, 10883-10889.
7. M.-H. Du, X.-Y. Zheng, X.-J. Kong, L.-S. Long, L.-S. Zheng, *Matter* **2020**, *3*, 1-16.
8. W.-P. Chen, P.-Q. Liao, Y. Yu, Z. Zheng, X.-M. Chen, Y. Zheng, *Angew. Chem., Int. Ed*. **2016**, *128*, 9521-9525.
9. Q.-F. Lin, J. Li, X.-M. Luo, C.-H. Cui, Y. Song, Y. Xu, *Inorg.Chem*., **2018**, *57*, 4799-4802.
10. B.-W. Qin, K-C. Huang, Y. Zhang, L. Zhou, Z. Cui, K. Zhang, X. Y. Zhang, J.-P. Zhang, *Chem. Eur. J*. **2018**, *24*, 1962-1970.
11. X. Hang, W. Yang, S. Wang, H. Han, W. Liao, B. Jia, *ACS Appl. Nano Mater*. **2019**, *2*, 4232-4237.
12. W.-P. Chen, P.-Q. Liao, P.-B. Jin, L. Zhang, B.-K. Ling, S.-C. Wang, Y.-T. Chan, X.-M. Chen, Y.-Z. Zheng, *J. Am. Chem. Soc*. **2020,** *142*, 4663-4670.
13. D.-P. Liu, X.-P. Lin, H. Zhang, X.-Y. Zheng, G.-L. Zhuang, X.-J. Kong, L.-S. Long, L.-S. Zheng, *Angew. Chem., Int. Ed*. **2016**, *55*, 4532-4536.
14. J. B. Peng, Q. C. Zhang, X. J. Kong, Y. Z. Zheng, Y. P. Ren, L. S. Long, R. B. Huang, L. S. Zheng, Z. Zheng, *J. Am. Chem. Soc*. **2012**, *134*, 3314-3317.
15. S. Fan, S.-H. Xu, X.-Y. Zheng, Z.-H. Yan, X.-J. Long, L.-S. Zheng, *CrystEngComm*. **2018**, *20*, 2120-2125.
16. K. S. Pedersen, G. Lorusso, J. J. Morales, T. Weyhermüller, S. Piligkos, S. K. Singh, D. Larsen, M. Schau-Magnussen, G. Rajaraman, M. Evangelisti, J.Bendix, *Angew. Chem., Int. Ed*. **2014**, *53*, 2394-2397.
17. F. Shao, J.-J. Zhuang, M.-G. Chen, N. Wang, H.-Y. Shi, J.-P. Tong, G. Luo, J. Tao, L.-S. Zheng, *Dalton Trans*. **2018**, *47*, 16850-16854.
18. H.-J. Lun, M.-H. Du, D.-H. Wang, X.-J. Kong, L.-S. Long, L.-S. Zheng, *Inorg. Chem*. **2020**, *59*, 7900-7904.
19. J. B. Peng, Q. C. Zhang, X. J. Kong, Y. P. Ren, L. S. Long, R. B. Huang, L. S. Zheng, Z. Zheng, *Angew. Chem., Int. Ed.* **2011**, *50*, 10649-10652.
20. Q. Lin, J. Li, Y. Dong, G. Zhou, Y. Song, Y. Xu, *Dalton Trans*. **2017**, *46*, 9745-9749.
21. J.-J. Yin, C. Chen, G.-L. Zhuang, J. Zheng, X.-Y. Zheng, X.-J. Kong, *Inorg. Chem*. **2020**, *59*, 1959-1966.
22. Y.-Z. Zheng, E. M. Pineda, M. Helliwell, R. E. P. Winpenny, *Chem. Eur. J*. **2012**, *18*, 4161-4165.
23. J. A. Sheikh, A. Clearfield, *Inorg. Chem.* **2016**, *55*, 8254-8256.
24. E. Moreno Pineda, F. Tuna, R. G. Pritchard, A. C. Regan, R. E. P. Winpenny, E. J. L. McInnes, *Chem. Commun*. **2013**, *49*, 3522-3524.
25. Y.-Z. Zheng, M. Evangelisti, R. E. P. Winpenny, *J. Am. Chem. Soc*. **2012**, *134*, 1057-1065.
26. Y.-Z. Zheng, E. M. Pineda, M. Helliwell, R. E. P. Winpenny, *Chem. Eur. J.* **2012**, *18*, 4161-4165.
27. A. S. Dinca, A. Ghirri, A. M. Madalan, M. Affronte, M. Andruh, *Inorg. Chem*. **2012**, *51*, 3935-3937.
28. Y.-Z. Zheng, M. Evangelisti, R. E. P. Winpenny, *Angew. Chem., Int. Ed*. **2011**, *50*, 3692-3695.
29. Z.-M. Zhang, L.-Y. Pan, W.-Q. Lin, J.-D. Leng, F.-S. Guo, Y.-C. Chen, J.-L. Liu, M.-L. Tong, *Chem. Commun*. **2013**, *49*, 8081-8083.
30. A. S. Dinca, A. Ghirri, A. M. Madalan, M. Affronte, M. Andruh, *Inorg. Chem*. **2012**, *51*, 3935-3937.
31. T. N. Hooper, R. Inglis, G. Lorusso, J. Ujma, P. E. Barran, D. Uhrin, J. Schnack, S. Piligkos, M. Evangelisti, E. K. Brechin, *Inorg. Chem*. **2016**, *55*, 10535-10546.
32. D. Dermitzaki, G. Lorusso, C. P. Raptopoulou, V. Psycharis, A. Escuer, M. Evangelisti, S. P. Perlepes, T. C. Stamatatos, *Inorg. Chem*. **2013**, *52*, 10235-10237.
33. H. Ke, X. Lu, W. Wei, W. Wang, G. Xie, S. Chen, *Dalton Trans*. **2017**, *46*, 8138-8145.
34. N. Li, Q. Lin, Y. Han, Z. Du, Y. Xu, *Chin. Chem. Letter*. **2021**, DOI: 10.1016/j.cclet.2021.04.042.
35. W. P. Chen, J. Singleton, L. Qin, A. Camon, L. Engelhardt, F. Luis, R. E. P. Winpenny, Y. Z. Zheng, *Nat. Commun.* **2018**, *9*, 1-6.
